# Supplementary material
Source: publisher figshare collection journal article supplement (https://gsajournals.figshare.com/ndownloader/files/21399360)
Supplement: Supplementary file 1 [file 21399360]

## Sheet: 2014_All
Table S6. All Trait Correlations
Trait 1	Trait 2	Pearson Correlation	Pearson p-value	Spearman Correlation	Spearman p-value
Days_to_Heading_Raw	Fifty_Kernel_Weight_Raw	-0.18	7.13972e-07	-0.16	1.62109e-05
Days_to_Heading_Raw	Percent_Productive_Tillers	0.27	1.15463e-14	0.23	7.23896e-11
Days_to_Heading_Raw	Plant_Height_Raw	0.11	0.00282735	0.17	1.58464e-06
Days_to_Heading_Raw	Seeds_Per_Spike_Raw	-0.1	0.00584888	-0.07	0.0440756
Days_to_Heading_Raw	Spike_Density	-0.19	3.60326e-07	-0.2	4.64841e-08
Days_to_Heading_Raw	Spike_Length_Raw	0.14	0.000111549	0.27	8.59313e-14
Days_to_Heading_Raw	Spike_Row_Type	-0.13	0.000244832	-0.17	2.22163e-06
Days_to_Heading_Raw	Stem_Diameter_Raw	0	0.942217	0.11	0.00664041
Days_to_Heading_Raw	Tiller_Number_Maximum_Raw	0.39	0	0.38	0
Days_to_Heading_Raw	Tiller_Number_Non_Productive_Raw	-0.09	0.0130159	-0.06	0.115912
Days_to_Heading_Raw	Tiller_Number_Productive_Raw	0.45	0	0.4	0
Days_to_Heading_Raw	Tiller_Number_Week_2	-0.11	0.00177393	-0.09	0.012868
Days_to_Heading_Raw	Tiller_Number_Week_3_Raw	-0.09	0.0117228	-0.07	0.0444126
Days_to_Heading_Raw	Tiller_Number_Week_4	0	0.929555	0.03	0.388785
Days_to_Heading_Raw	Tiller_Number_Week_5_Raw	0.18	1.06417e-06	0.21	3.28495e-09
Days_to_Heading_Raw	Tiller_Number_Week_6_Raw	0.34	0	0.36	0
Days_to_Heading_Raw	Tiller_Number_Week_7_Raw	0.45	0	0.44	0
Days_to_Heading_Raw	Tillering_Rate	0.2	1.10428e-08	0.21	5.86878e-09
Days_to_Heading_Raw	Weeks_Increasing_Raw	0.47	0	0.46	0
Fifty_Kernel_Weight_Raw	Percent_Productive_Tillers	0.19	1.2214e-07	0.18	7.47447e-07
Fifty_Kernel_Weight_Raw	Plant_Height_Raw	0.21	1.03035e-08	0.21	1.75329e-08
Fifty_Kernel_Weight_Raw	Seeds_Per_Spike_Raw	-0.23	4.99428e-10	-0.23	2.03333e-10
Fifty_Kernel_Weight_Raw	Spike_Density	-0.32	0	-0.32	0
Fifty_Kernel_Weight_Raw	Spike_Length_Raw	0.27	2.34923e-13	0.27	4.04787e-13
Fifty_Kernel_Weight_Raw	Spike_Row_Type	-0.36	0	-0.36	0
Fifty_Kernel_Weight_Raw	Stem_Diameter_Raw	-0.07	0.0852109	-0.07	0.104374
Fifty_Kernel_Weight_Raw	Tiller_Number_Maximum_Raw	0.05	0.177828	0.05	0.142573
Fifty_Kernel_Weight_Raw	Tiller_Number_Non_Productive_Raw	-0.16	1.76845e-05	-0.14	0.000190135
Fifty_Kernel_Weight_Raw	Tiller_Number_Productive_Raw	0.12	0.0010346	0.13	0.000368834
Fifty_Kernel_Weight_Raw	Tiller_Number_Week_2	0.18	6.19503e-07	0.17	3.7038e-06
Fifty_Kernel_Weight_Raw	Tiller_Number_Week_3_Raw	0.21	1.90302e-08	0.19	2.74638e-07
Fifty_Kernel_Weight_Raw	Tiller_Number_Week_4	0.09	0.0154516	0.08	0.0268717
Fifty_Kernel_Weight_Raw	Tiller_Number_Week_5_Raw	0.05	0.207943	0.06	0.136473
Fifty_Kernel_Weight_Raw	Tiller_Number_Week_6_Raw	0.08	0.0241585	0.08	0.0223837
Fifty_Kernel_Weight_Raw	Tiller_Number_Week_7_Raw	0.09	0.0135963	0.1	0.0074509
Fifty_Kernel_Weight_Raw	Tillering_Rate	0.02	0.676236	0.03	0.470983
Fifty_Kernel_Weight_Raw	Weeks_Increasing_Raw	0.08	0.0276205	0.08	0.0274728
Percent_Productive_Tillers	Plant_Height_Raw	0.1	0.00810973	0.06	0.0728711
Percent_Productive_Tillers	Seeds_Per_Spike_Raw	-0.19	2.09487e-07	-0.18	1.05338e-06
Percent_Productive_Tillers	Spike_Density	-0.23	7.05588e-10	-0.23	1.27081e-09
Percent_Productive_Tillers	Spike_Length_Raw	0.15	6.12195e-05	0.15	5.68237e-05
Percent_Productive_Tillers	Spike_Row_Type	-0.21	5.15997e-09	-0.2	2.11926e-08
Percent_Productive_Tillers	Stem_Diameter_Raw	-0.1	0.0137285	-0.12	0.00224824
Percent_Productive_Tillers	Tiller_Number_Maximum_Raw	0.22	6.52712e-10	0.2	1.02926e-08
Percent_Productive_Tillers	Tiller_Number_Non_Productive_Raw	-0.74	0	-0.83	0
Percent_Productive_Tillers	Tiller_Number_Productive_Raw	0.55	0	0.55	0
Percent_Productive_Tillers	Tiller_Number_Week_2	-0.05	0.139067	-0.09	0.0122494
Percent_Productive_Tillers	Tiller_Number_Week_3_Raw	-0.01	0.772736	-0.05	0.134828
Percent_Productive_Tillers	Tiller_Number_Week_4	-0.01	0.855193	-0.03	0.361417
Percent_Productive_Tillers	Tiller_Number_Week_5_Raw	0.06	0.104154	0.04	0.313994
Percent_Productive_Tillers	Tiller_Number_Week_6_Raw	0.21	2.02904e-09	0.2	2.21818e-08
Percent_Productive_Tillers	Tiller_Number_Week_7_Raw	0.38	0	0.38	0
Percent_Productive_Tillers	Tillering_Rate	0.03	0.46999	-0.01	0.825697
Percent_Productive_Tillers	Weeks_Increasing_Raw	0.54	0	0.57	0
Plant_Height_Raw	Seeds_Per_Spike_Raw	0.29	8.88178e-16	0.28	1.11022e-14
Plant_Height_Raw	Spike_Density	0.01	0.864756	0	0.968062
Plant_Height_Raw	Spike_Length_Raw	0.47	0	0.46	0
Plant_Height_Raw	Spike_Row_Type	0.02	0.530021	0.02	0.530546
Plant_Height_Raw	Stem_Diameter_Raw	0.5	0	0.48	0
Plant_Height_Raw	Tiller_Number_Maximum_Raw	0.42	0	0.44	0
Plant_Height_Raw	Tiller_Number_Non_Productive_Raw	0.15	2.32224e-05	0.16	6.01287e-06
Plant_Height_Raw	Tiller_Number_Productive_Raw	0.37	0	0.4	0
Plant_Height_Raw	Tiller_Number_Week_2	0.38	0	0.36	0
Plant_Height_Raw	Tiller_Number_Week_3_Raw	0.47	0	0.47	0
Plant_Height_Raw	Tiller_Number_Week_4	0.45	0	0.44	0
Plant_Height_Raw	Tiller_Number_Week_5_Raw	0.45	0	0.47	0
Plant_Height_Raw	Tiller_Number_Week_6_Raw	0.44	0	0.46	0
Plant_Height_Raw	Tiller_Number_Week_7_Raw	0.37	0	0.39	0
Plant_Height_Raw	Tillering_Rate	0.44	0	0.46	0
Plant_Height_Raw	Weeks_Increasing_Raw	0	0.98599	0	0.953009
Ppd_H1_Geno	Days_to_Heading_Raw	0.33	0	0.42	0
Ppd_H1_Geno	Fifty_Kernel_Weight_Raw	0.05	0.141142	0.05	0.170223
Ppd_H1_Geno	Percent_Productive_Tillers	0.15	1.89203e-05	0.16	7.50935e-06
Ppd_H1_Geno	Plant_Height_Raw	0.24	9.26415e-12	0.24	4.08831e-11
Ppd_H1_Geno	Seeds_Per_Spike_Raw	-0.14	0.000136491	-0.15	2.29276e-05
Ppd_H1_Geno	Spike_Density	-0.31	0	-0.33	0
Ppd_H1_Geno	Spike_Length_Raw	0.47	0	0.48	0
Ppd_H1_Geno	Spike_Row_Type	-0.36	0	-0.36	0
Ppd_H1_Geno	Stem_Diameter_Raw	0.18	4.11581e-06	0.16	3.61662e-05
Ppd_H1_Geno	Tiller_Number_Maximum_Raw	0.27	2.53131e-14	0.31	0
Ppd_H1_Geno	Tiller_Number_Non_Productive_Raw	-0.01	0.792224	0	0.892028
Ppd_H1_Geno	Tiller_Number_Productive_Raw	0.29	4.44089e-16	0.33	0
Ppd_H1_Geno	Tiller_Number_Week_2	0.19	7.59144e-08	0.19	1.28061e-07
Ppd_H1_Geno	Tiller_Number_Week_3_Raw	0.17	1.10089e-06	0.17	2.41236e-06
Ppd_H1_Geno	Tiller_Number_Week_4	0.18	3.10824e-07	0.2	3.753e-08
Ppd_H1_Geno	Tiller_Number_Week_5_Raw	0.21	4.7848e-09	0.23	4.77973e-11
Ppd_H1_Geno	Tiller_Number_Week_6_Raw	0.28	1.9984e-15	0.31	0
Ppd_H1_Geno	Tiller_Number_Week_7_Raw	0.3	0	0.34	0
Ppd_H1_Geno	Tillering_Rate	0.19	7.6785e-08	0.22	9.79705e-10
Ppd_H1_Geno	Weeks_Increasing_Raw	0.24	3.48426e-11	0.24	1.4867e-11
Seeds_Per_Spike_Raw	Spike_Density	0.86	0	0.88	0
Seeds_Per_Spike_Raw	Spike_Length_Raw	-0.13	0.000336164	-0.15	4.87116e-05
Seeds_Per_Spike_Raw	Spike_Row_Type	0.69	0	0.72	0
Seeds_Per_Spike_Raw	Stem_Diameter_Raw	0.52	0	0.47	0
Seeds_Per_Spike_Raw	Tiller_Number_Maximum_Raw	-0.07	0.0672995	-0.04	0.303178
Seeds_Per_Spike_Raw	Tiller_Number_Non_Productive_Raw	0.15	5.02204e-05	0.15	3.76172e-05
Seeds_Per_Spike_Raw	Tiller_Number_Productive_Raw	-0.14	0.00020499	-0.1	0.00493939
Seeds_Per_Spike_Raw	Tiller_Number_Week_2	-0.13	0.000260265	-0.15	5.60466e-05
Seeds_Per_Spike_Raw	Tiller_Number_Week_3_Raw	-0.03	0.406718	-0.02	0.681656
Seeds_Per_Spike_Raw	Tiller_Number_Week_4	0	0.905226	-0.01	0.858356
Seeds_Per_Spike_Raw	Tiller_Number_Week_5_Raw	0.01	0.882563	0.02	0.540167
Seeds_Per_Spike_Raw	Tiller_Number_Week_6_Raw	-0.09	0.0171995	-0.05	0.133543
Seeds_Per_Spike_Raw	Tiller_Number_Week_7_Raw	-0.13	0.000355726	-0.1	0.00549682
Seeds_Per_Spike_Raw	Tillering_Rate	0.03	0.467566	0.04	0.239915
Seeds_Per_Spike_Raw	Weeks_Increasing_Raw	-0.21	5.61697e-09	-0.22	2.26235e-09
Spike_Density	Tillering_Rate	-0.13	0.000769917	-0.11	0.00456347
Spike_Length_Raw	Spike_Density	-0.56	0	-0.57	0
Spike_Length_Raw	Spike_Row_Type	-0.48	0	-0.49	0
Spike_Length_Raw	Stem_Diameter_Raw	0.21	1.05424e-07	0.2	6.94825e-07
Spike_Length_Raw	Tiller_Number_Maximum_Raw	0.3	4.44089e-16	0.33	0
Spike_Length_Raw	Tiller_Number_Non_Productive_Raw	0.06	0.105466	0.05	0.182683
Spike_Length_Raw	Tiller_Number_Productive_Raw	0.29	3.9968e-15	0.33	0
Spike_Length_Raw	Tiller_Number_Week_2	0.34	0	0.34	0
Spike_Length_Raw	Tiller_Number_Week_3_Raw	0.32	0	0.31	0
Spike_Length_Raw	Tiller_Number_Week_4	0.29	4.44089e-16	0.29	1.33227e-15
Spike_Length_Raw	Tiller_Number_Week_5_Raw	0.29	2.22045e-15	0.3	2.22045e-16
Spike_Length_Raw	Tiller_Number_Week_6_Raw	0.32	0	0.34	0
Spike_Length_Raw	Tiller_Number_Week_7_Raw	0.3	0	0.34	0
Spike_Length_Raw	Tillering_Rate	0.27	1.26121e-13	0.28	9.32587e-15
Spike_Length_Raw	Weeks_Increasing_Raw	0.13	0.000457779	0.14	0.000228629
Spike_Row_Type	Spike_Density	0.77	0	0.8	0
Spike_Row_Type	Tillering_Rate	-0.1	0.00373625	-0.12	0.000998455
Stem_Diameter_Raw	Spike_Density	0.32	3.10862e-15	0.28	3.19256e-12
Stem_Diameter_Raw	Spike_Row_Type	0.29	7.99361e-14	0.29	1.47882e-13
Stem_Diameter_Raw	Tiller_Number_Maximum_Raw	0.15	0.00019023	0.2	3.94035e-07
Stem_Diameter_Raw	Tiller_Number_Non_Productive_Raw	0.21	5.64923e-08	0.21	7.81642e-08
Stem_Diameter_Raw	Tiller_Number_Productive_Raw	0.07	0.0958536	0.12	0.00153961
Stem_Diameter_Raw	Tiller_Number_Week_2	0.14	0.000229588	0.13	0.000662849
Stem_Diameter_Raw	Tiller_Number_Week_3_Raw	0.21	4.84019e-08	0.22	1.50771e-08
Stem_Diameter_Raw	Tiller_Number_Week_4	0.25	3.0698e-10	0.25	1.2915e-10
Stem_Diameter_Raw	Tiller_Number_Week_5_Raw	0.22	3.53587e-08	0.24	1.58249e-09
Stem_Diameter_Raw	Tiller_Number_Week_6_Raw	0.14	0.000294783	0.19	1.74552e-06
Stem_Diameter_Raw	Tiller_Number_Week_7_Raw	0.07	0.0629913	0.13	0.00145989
Stem_Diameter_Raw	Tillering_Rate	0.24	3.94654e-10	0.27	6.10756e-12
Stem_Diameter_Raw	Weeks_Increasing_Raw	-0.17	1.24447e-05	-0.17	1.3014e-05
Tiller_Number_Maximum_Raw	Spike_Density	-0.21	1.77422e-08	-0.2	1.5172e-07
Tiller_Number_Maximum_Raw	Spike_Row_Type	-0.18	3.8757e-07	-0.2	1.77944e-08
Tiller_Number_Maximum_Raw	Tiller_Number_Non_Productive_Raw	0.33	0	0.26	1.16795e-13
Tiller_Number_Maximum_Raw	Tiller_Number_Productive_Raw	0.91	0	0.91	0
Tiller_Number_Maximum_Raw	Tiller_Number_Week_2	0.54	0	0.56	0
Tiller_Number_Maximum_Raw	Tiller_Number_Week_3_Raw	0.66	0	0.67	0
Tiller_Number_Maximum_Raw	Tiller_Number_Week_4	0.78	0	0.79	0
Tiller_Number_Maximum_Raw	Tiller_Number_Week_5_Raw	0.91	0	0.92	0
Tiller_Number_Maximum_Raw	Tiller_Number_Week_6_Raw	0.95	0	0.96	0
Tiller_Number_Maximum_Raw	Tiller_Number_Week_7_Raw	0.94	0	0.93	0
Tiller_Number_Maximum_Raw	Tillering_Rate	0.91	0	0.91	0
Tiller_Number_Maximum_Raw	Weeks_Increasing_Raw	0.27	3.10862e-14	0.25	1.60094e-12
Tiller_Number_Non_Productive_Raw	Spike_Density	0.08	0.0406277	0.11	0.0049711
Tiller_Number_Non_Productive_Raw	Spike_Row_Type	0.07	0.0704277	0.07	0.0657833
Tiller_Number_Non_Productive_Raw	Tiller_Number_Productive_Raw	-0.09	0.0132817	-0.1	0.00391063
Tiller_Number_Non_Productive_Raw	Tiller_Number_Week_2	0.36	0	0.39	0
Tiller_Number_Non_Productive_Raw	Tiller_Number_Week_3_Raw	0.39	0	0.39	0
Tiller_Number_Non_Productive_Raw	Tiller_Number_Week_4	0.47	0	0.43	0
Tiller_Number_Non_Productive_Raw	Tiller_Number_Week_5_Raw	0.47	0	0.41	0
Tiller_Number_Non_Productive_Raw	Tiller_Number_Week_6_Raw	0.33	0	0.27	6.66134e-14
Tiller_Number_Non_Productive_Raw	Tiller_Number_Week_7_Raw	0.13	0.000203056	0.07	0.0476723
Tiller_Number_Non_Productive_Raw	Tillering_Rate	0.49	0	0.44	0
Tiller_Number_Non_Productive_Raw	Weeks_Increasing_Raw	-0.34	0	-0.43	0
Tiller_Number_Productive_Raw	Spike_Density	-0.25	7.03904e-12	-0.25	9.16556e-12
Tiller_Number_Productive_Raw	Spike_Row_Type	-0.22	7.17642e-10	-0.26	5.53779e-13
Tiller_Number_Productive_Raw	Tiller_Number_Week_2	0.42	0	0.44	0
Tiller_Number_Productive_Raw	Tiller_Number_Week_3_Raw	0.53	0	0.54	0
Tiller_Number_Productive_Raw	Tiller_Number_Week_4	0.61	0	0.65	0
Tiller_Number_Productive_Raw	Tiller_Number_Week_5_Raw	0.75	0	0.77	0
Tiller_Number_Productive_Raw	Tiller_Number_Week_6_Raw	0.86	0	0.88	0
Tiller_Number_Productive_Raw	Tiller_Number_Week_7_Raw	0.93	0	0.94	0
Tiller_Number_Productive_Raw	Tillering_Rate	0.75	0	0.75	0
Tiller_Number_Productive_Raw	Weeks_Increasing_Raw	0.43	0	0.43	0
Tiller_Number_Week_2	Spike_Density	-0.27	2.12719e-13	-0.27	1.49214e-13
Tiller_Number_Week_2	Spike_Row_Type	-0.34	0	-0.33	0
Tiller_Number_Week_2	Tiller_Number_Week_3_Raw	0.85	0	0.84	0
Tiller_Number_Week_2	Tiller_Number_Week_4	0.78	0	0.78	0
Tiller_Number_Week_2	Tiller_Number_Week_5_Raw	0.67	0	0.68	0
Tiller_Number_Week_2	Tiller_Number_Week_6_Raw	0.59	0	0.6	0
Tiller_Number_Week_2	Tiller_Number_Week_7_Raw	0.44	0	0.46	0
Tiller_Number_Week_2	Tillering_Rate	0.64	0	0.66	0
Tiller_Number_Week_2	Weeks_Increasing_Raw	-0.2	1.13264e-08	-0.2	3.72329e-08
Tiller_Number_Week_3_Raw	Spike_Density	-0.19	1.87041e-07	-0.17	8.99745e-06
Tiller_Number_Week_3_Raw	Spike_Row_Type	-0.23	5.99478e-11	-0.21	3.73179e-09
Tiller_Number_Week_3_Raw	Tiller_Number_Week_4	0.87	0	0.86	0
Tiller_Number_Week_3_Raw	Tiller_Number_Week_5_Raw	0.78	0	0.78	0
Tiller_Number_Week_3_Raw	Tiller_Number_Week_6_Raw	0.7	0	0.7	0
Tiller_Number_Week_3_Raw	Tiller_Number_Week_7_Raw	0.54	0	0.55	0
Tiller_Number_Week_3_Raw	Tillering_Rate	0.75	0	0.75	0
Tiller_Number_Week_3_Raw	Weeks_Increasing_Raw	-0.16	1.06358e-05	-0.16	6.6427e-06
Tiller_Number_Week_4	Spike_Density	-0.16	2.46648e-05	-0.15	7.91627e-05
Tiller_Number_Week_4	Spike_Row_Type	-0.17	2.02479e-06	-0.18	9.37464e-07
Tiller_Number_Week_4	Tiller_Number_Week_5_Raw	0.9	0	0.9	0
Tiller_Number_Week_4	Tiller_Number_Week_6_Raw	0.81	0	0.81	0
Tiller_Number_Week_4	Tiller_Number_Week_7_Raw	0.65	0	0.66	0
Tiller_Number_Week_4	Tillering_Rate	0.88	0	0.88	0
Tiller_Number_Week_4	Weeks_Increasing_Raw	-0.14	8.04488e-05	-0.14	0.000116782
Tiller_Number_Week_5_Raw	Spike_Density	-0.15	6.99652e-05	-0.13	0.000405104
Tiller_Number_Week_5_Raw	Spike_Row_Type	-0.14	0.000137097	-0.15	4.2299e-05
Tiller_Number_Week_5_Raw	Tiller_Number_Week_6_Raw	0.93	0	0.93	0
Tiller_Number_Week_5_Raw	Tiller_Number_Week_7_Raw	0.81	0	0.81	0
Tiller_Number_Week_5_Raw	Tillering_Rate	0.94	0	0.93	0
Tiller_Number_Week_5_Raw	Weeks_Increasing_Raw	0.02	0.576661	0.01	0.693853
Tiller_Number_Week_6_Raw	Spike_Density	-0.23	3.32344e-10	-0.21	8.02422e-09
Tiller_Number_Week_6_Raw	Spike_Row_Type	-0.22	5.87972e-10	-0.23	6.35718e-11
Tiller_Number_Week_6_Raw	Tiller_Number_Week_7_Raw	0.9	0	0.91	0
Tiller_Number_Week_6_Raw	Tillering_Rate	0.89	0	0.88	0
Tiller_Number_Week_6_Raw	Weeks_Increasing_Raw	0.23	1.4608e-10	0.23	1.74206e-10
Tiller_Number_Week_7_Raw	Spike_Density	-0.26	2.83351e-12	-0.26	1.42597e-12
Tiller_Number_Week_7_Raw	Spike_Row_Type	-0.23	1.58675e-10	-0.26	3.80362e-13
Tiller_Number_Week_7_Raw	Tillering_Rate	0.79	0	0.77	0
Tiller_Number_Week_7_Raw	Weeks_Increasing_Raw	0.42	0	0.42	0
Weeks_Increasing_Raw	Spike_Density	-0.23	4.14224e-10	-0.25	9.64229e-12
Weeks_Increasing_Raw	Spike_Row_Type	-0.22	6.75765e-10	-0.23	9.35261e-11
Weeks_Increasing_Raw	Tillering_Rate	-0.11	0.00217215	-0.12	0.000762559

## Sheet: 2014_2-Row
Trait 1	Trait 2	Pearson Correlation	Pearson p-value	Spearman Correlation	Spearman p-value
Days_to_Heading_Raw	Fifty_Kernel_Weight_Raw	-0.44	0	-0.47	0
Days_to_Heading_Raw	Percent_Productive_Tillers	0.11	0.0347283	0.08	0.100041
Days_to_Heading_Raw	Plant_Height_Raw	0	0.933131	0.07	0.202856
Days_to_Heading_Raw	Seeds_Per_Spike_Raw	0.06	0.227841	0.16	0.00242267
Days_to_Heading_Raw	Spike_Density	-0.02	0.653102	0.01	0.869346
Days_to_Heading_Raw	Spike_Length_Raw	0.01	0.868472	0.15	0.00315041
Days_to_Heading_Raw	Stem_Diameter_Raw	0.08	0.14787	0.21	0.000134765
Days_to_Heading_Raw	Tiller_Number_Maximum_Raw	0.27	5.89336e-08	0.3	3.21322e-09
Days_to_Heading_Raw	Tiller_Number_Non_Productive_Raw	0.02	0.765473	0.03	0.604033
Days_to_Heading_Raw	Tiller_Number_Productive_Raw	0.28	1.52979e-08	0.28	4.21643e-08
Days_to_Heading_Raw	Tiller_Number_Week_2	-0.17	0.000592581	-0.17	0.00104233
Days_to_Heading_Raw	Tiller_Number_Week_3_Raw	-0.16	0.00224214	-0.16	0.00153798
Days_to_Heading_Raw	Tiller_Number_Week_4	-0.06	0.205515	-0.03	0.532751
Days_to_Heading_Raw	Tiller_Number_Week_5_Raw	0.11	0.0357401	0.14	0.00453975
Days_to_Heading_Raw	Tiller_Number_Week_6_Raw	0.23	5.85666e-06	0.27	5.54426e-08
Days_to_Heading_Raw	Tiller_Number_Week_7_Raw	0.31	9.92025e-10	0.32	1.85139e-10
Days_to_Heading_Raw	Tillering_Rate	0.13	0.00869233	0.16	0.00196213
Days_to_Heading_Raw	Weeks_Increasing_Raw	0.35	1.06315e-12	0.34	1.65534e-11
Fifty_Kernel_Weight_Raw	Percent_Productive_Tillers	0.18	0.000603455	0.19	0.000235197
Fifty_Kernel_Weight_Raw	Plant_Height_Raw	0.2	0.000126606	0.2	0.000153701
Fifty_Kernel_Weight_Raw	Seeds_Per_Spike_Raw	0.06	0.219277	0.05	0.320296
Fifty_Kernel_Weight_Raw	Spike_Density	-0.01	0.872357	0.01	0.823335
Fifty_Kernel_Weight_Raw	Spike_Length_Raw	0.06	0.253062	0.04	0.405508
Fifty_Kernel_Weight_Raw	Stem_Diameter_Raw	-0.07	0.24356	-0.07	0.197869
Fifty_Kernel_Weight_Raw	Tiller_Number_Maximum_Raw	0.03	0.571498	-0.01	0.900416
Fifty_Kernel_Weight_Raw	Tiller_Number_Non_Productive_Raw	-0.16	0.00240189	-0.19	0.000206416
Fifty_Kernel_Weight_Raw	Tiller_Number_Productive_Raw	0.1	0.0555114	0.07	0.163362
Fifty_Kernel_Weight_Raw	Tiller_Number_Week_2	0.14	0.00892806	0.12	0.0261108
Fifty_Kernel_Weight_Raw	Tiller_Number_Week_3_Raw	0.22	2.69334e-05	0.19	0.000226969
Fifty_Kernel_Weight_Raw	Tiller_Number_Week_4	0.11	0.0438144	0.07	0.171338
Fifty_Kernel_Weight_Raw	Tiller_Number_Week_5_Raw	0.05	0.323085	0.02	0.65993
Fifty_Kernel_Weight_Raw	Tiller_Number_Week_6_Raw	0.02	0.688142	-0.01	0.791543
Fifty_Kernel_Weight_Raw	Tiller_Number_Week_7_Raw	0.04	0.489987	0.01	0.826256
Fifty_Kernel_Weight_Raw	Tillering_Rate	0.02	0.768145	-0.01	0.909447
Fifty_Kernel_Weight_Raw	Weeks_Increasing_Raw	0.03	0.627338	0.02	0.773739
Percent_Productive_Tillers	Plant_Height_Raw	0.15	0.00281589	0.17	0.00116693
Percent_Productive_Tillers	Seeds_Per_Spike_Raw	0.15	0.00370997	0.13	0.0138589
Percent_Productive_Tillers	Spike_Density	0	0.977918	-0.01	0.824502
Percent_Productive_Tillers	Spike_Length_Raw	0.14	0.00746563	0.17	0.000864488
Percent_Productive_Tillers	Stem_Diameter_Raw	-0.04	0.506969	-0.02	0.655578
Percent_Productive_Tillers	Tiller_Number_Maximum_Raw	0.14	0.00633802	0.14	0.0058064
Percent_Productive_Tillers	Tiller_Number_Non_Productive_Raw	-0.8	0	-0.87	0
Percent_Productive_Tillers	Tiller_Number_Productive_Raw	0.49	0	0.48	0
Percent_Productive_Tillers	Tiller_Number_Week_2	-0.16	0.00214482	-0.17	0.000828221
Percent_Productive_Tillers	Tiller_Number_Week_3_Raw	-0.03	0.507352	-0.05	0.305872
Percent_Productive_Tillers	Tiller_Number_Week_4	-0.07	0.152943	-0.07	0.155407
Percent_Productive_Tillers	Tiller_Number_Week_5_Raw	0.02	0.708468	0.01	0.819531
Percent_Productive_Tillers	Tiller_Number_Week_6_Raw	0.12	0.0221529	0.1	0.0401261
Percent_Productive_Tillers	Tiller_Number_Week_7_Raw	0.27	1.05451e-07	0.27	6.65974e-08
Percent_Productive_Tillers	Tillering_Rate	-0.04	0.421299	-0.06	0.222158
Percent_Productive_Tillers	Weeks_Increasing_Raw	0.5	0	0.52	0
Plant_Height_Raw	Seeds_Per_Spike_Raw	0.4	8.88178e-16	0.43	0
Plant_Height_Raw	Spike_Density	-0.04	0.488468	-0.02	0.718759
Plant_Height_Raw	Spike_Length_Raw	0.54	0	0.57	0
Plant_Height_Raw	Stem_Diameter_Raw	0.49	0	0.47	0
Plant_Height_Raw	Tiller_Number_Maximum_Raw	0.42	0	0.43	0
Plant_Height_Raw	Tiller_Number_Non_Productive_Raw	0.07	0.185409	0.04	0.430018
Plant_Height_Raw	Tiller_Number_Productive_Raw	0.42	0	0.44	0
Plant_Height_Raw	Tiller_Number_Week_2	0.41	0	0.37	3.4639e-14
Plant_Height_Raw	Tiller_Number_Week_3_Raw	0.47	0	0.45	0
Plant_Height_Raw	Tiller_Number_Week_4	0.43	0	0.41	0
Plant_Height_Raw	Tiller_Number_Week_5_Raw	0.45	0	0.45	0
Plant_Height_Raw	Tiller_Number_Week_6_Raw	0.44	0	0.45	0
Plant_Height_Raw	Tiller_Number_Week_7_Raw	0.38	2.35367e-14	0.41	0
Plant_Height_Raw	Tillering_Rate	0.43	0	0.42	0
Plant_Height_Raw	Weeks_Increasing_Raw	0	0.969532	0.01	0.879897
Ppd_H1_Geno	Days_to_Heading_Raw	0.39	3.10862e-15	0.49	0
Ppd_H1_Geno	Fifty_Kernel_Weight_Raw	-0.21	4.70219e-05	-0.23	9.4031e-06
Ppd_H1_Geno	Percent_Productive_Tillers	0.13	0.011303	0.11	0.0286497
Ppd_H1_Geno	Plant_Height_Raw	0.35	1.6831e-12	0.34	1.03524e-11
Ppd_H1_Geno	Seeds_Per_Spike_Raw	0.21	6.53942e-05	0.24	3.59841e-06
Ppd_H1_Geno	Spike_Density	-0.13	0.0115895	-0.1	0.0550405
Ppd_H1_Geno	Spike_Length_Raw	0.41	2.22045e-16	0.42	0
Ppd_H1_Geno	Stem_Diameter_Raw	0.26	2.43985e-06	0.25	4.9882e-06
Ppd_H1_Geno	Tiller_Number_Maximum_Raw	0.33	4.58988e-11	0.35	8.61533e-13
Ppd_H1_Geno	Tiller_Number_Non_Productive_Raw	0.09	0.0950531	0.08	0.0963395
Ppd_H1_Geno	Tiller_Number_Productive_Raw	0.31	4.0793e-10	0.35	1.14064e-12
Ppd_H1_Geno	Tiller_Number_Week_2	0.13	0.0094685	0.13	0.0112958
Ppd_H1_Geno	Tiller_Number_Week_3_Raw	0.16	0.00193725	0.16	0.00137869
Ppd_H1_Geno	Tiller_Number_Week_4	0.22	1.64885e-05	0.22	1.06855e-05
Ppd_H1_Geno	Tiller_Number_Week_5_Raw	0.29	6.88983e-09	0.31	8.29447e-10
Ppd_H1_Geno	Tiller_Number_Week_6_Raw	0.35	1.46749e-12	0.37	3.10862e-14
Ppd_H1_Geno	Tiller_Number_Week_7_Raw	0.34	6.0334e-12	0.37	7.08322e-14
Ppd_H1_Geno	Tillering_Rate	0.26	2.78189e-07	0.26	1.64915e-07
Ppd_H1_Geno	Weeks_Increasing_Raw	0.23	4.05367e-06	0.21	3.69908e-05
Seeds_Per_Spike_Raw	Spike_Density	0.65	0	0.64	0
Seeds_Per_Spike_Raw	Spike_Length_Raw	0.43	0	0.44	0
Seeds_Per_Spike_Raw	Stem_Diameter_Raw	0.28	2.81525e-07	0.24	1.21423e-05
Seeds_Per_Spike_Raw	Tiller_Number_Maximum_Raw	0.2	0.00012051	0.27	9.44191e-08
Seeds_Per_Spike_Raw	Tiller_Number_Non_Productive_Raw	-0.02	0.74544	0.04	0.485048
Seeds_Per_Spike_Raw	Tiller_Number_Productive_Raw	0.22	1.9971e-05	0.3	4.07984e-09
Seeds_Per_Spike_Raw	Tiller_Number_Week_2	0.19	0.000156912	0.17	0.000719554
Seeds_Per_Spike_Raw	Tiller_Number_Week_3_Raw	0.21	4.6313e-05	0.2	7.14606e-05
Seeds_Per_Spike_Raw	Tiller_Number_Week_4	0.18	0.000511436	0.19	0.000172467
Seeds_Per_Spike_Raw	Tiller_Number_Week_5_Raw	0.2	0.000143932	0.24	3.17631e-06
Seeds_Per_Spike_Raw	Tiller_Number_Week_6_Raw	0.23	8.27281e-06	0.28	2.63762e-08
Seeds_Per_Spike_Raw	Tiller_Number_Week_7_Raw	0.22	1.93388e-05	0.28	4.68311e-08
Seeds_Per_Spike_Raw	Tillering_Rate	0.2	7.42465e-05	0.26	5.55602e-07
Seeds_Per_Spike_Raw	Weeks_Increasing_Raw	0.02	0.675173	0.02	0.647966
Spike_Density	Tillering_Rate	-0.02	0.749709	0.04	0.45093
Spike_Length_Raw	Spike_Density	-0.38	5.81757e-14	-0.34	4.02571e-11
Spike_Length_Raw	Stem_Diameter_Raw	0.38	1.78413e-12	0.38	1.82077e-12
Spike_Length_Raw	Tiller_Number_Maximum_Raw	0.22	2.79823e-05	0.27	1.47803e-07
Spike_Length_Raw	Tiller_Number_Non_Productive_Raw	0	0.952555	-0.03	0.622398
Spike_Length_Raw	Tiller_Number_Productive_Raw	0.23	1.04723e-05	0.28	2.48615e-08
Spike_Length_Raw	Tiller_Number_Week_2	0.17	0.000774021	0.15	0.0031347
Spike_Length_Raw	Tiller_Number_Week_3_Raw	0.2	0.000150266	0.2	0.000117363
Spike_Length_Raw	Tiller_Number_Week_4	0.2	9.90048e-05	0.2	8.90312e-05
Spike_Length_Raw	Tiller_Number_Week_5_Raw	0.23	9.71221e-06	0.25	6.99103e-07
Spike_Length_Raw	Tiller_Number_Week_6_Raw	0.23	5.00387e-06	0.27	1.89192e-07
Spike_Length_Raw	Tiller_Number_Week_7_Raw	0.23	1.07574e-05	0.29	1.26972e-08
Spike_Length_Raw	Tillering_Rate	0.21	3.44361e-05	0.24	3.38655e-06
Spike_Length_Raw	Weeks_Increasing_Raw	0.04	0.442875	0.07	0.204251
Stem_Diameter_Raw	Spike_Density	-0.05	0.394245	-0.07	0.236591
Stem_Diameter_Raw	Tiller_Number_Maximum_Raw	0.22	8.81005e-05	0.26	1.94804e-06
Stem_Diameter_Raw	Tiller_Number_Non_Productive_Raw	0.17	0.00196928	0.14	0.010973
Stem_Diameter_Raw	Tiller_Number_Productive_Raw	0.16	0.00417371	0.23	4.29437e-05
Stem_Diameter_Raw	Tiller_Number_Week_2	0.22	7.32625e-05	0.2	0.000294825
Stem_Diameter_Raw	Tiller_Number_Week_3_Raw	0.22	7.13283e-05	0.24	1.79476e-05
Stem_Diameter_Raw	Tiller_Number_Week_4	0.26	2.65366e-06	0.28	3.3106e-07
Stem_Diameter_Raw	Tiller_Number_Week_5_Raw	0.25	4.78891e-06	0.27	7.55091e-07
Stem_Diameter_Raw	Tiller_Number_Week_6_Raw	0.24	1.84881e-05	0.28	3.71511e-07
Stem_Diameter_Raw	Tiller_Number_Week_7_Raw	0.18	0.00116429	0.22	4.43205e-05
Stem_Diameter_Raw	Tillering_Rate	0.28	1.94769e-07	0.31	7.86781e-09
Stem_Diameter_Raw	Weeks_Increasing_Raw	-0.13	0.0202423	-0.12	0.031984
Tiller_Number_Maximum_Raw	Spike_Density	-0.04	0.424717	0.03	0.630812
Tiller_Number_Maximum_Raw	Tiller_Number_Non_Productive_Raw	0.35	2.04503e-12	0.27	1.02464e-07
Tiller_Number_Maximum_Raw	Tiller_Number_Productive_Raw	0.91	0	0.91	0
Tiller_Number_Maximum_Raw	Tiller_Number_Week_2	0.52	0	0.5	0
Tiller_Number_Maximum_Raw	Tiller_Number_Week_3_Raw	0.68	0	0.67	0
Tiller_Number_Maximum_Raw	Tiller_Number_Week_4	0.79	0	0.78	0
Tiller_Number_Maximum_Raw	Tiller_Number_Week_5_Raw	0.91	0	0.91	0
Tiller_Number_Maximum_Raw	Tiller_Number_Week_6_Raw	0.95	0	0.95	0
Tiller_Number_Maximum_Raw	Tiller_Number_Week_7_Raw	0.94	0	0.93	0
Tiller_Number_Maximum_Raw	Tillering_Rate	0.91	0	0.9	0
Tiller_Number_Maximum_Raw	Weeks_Increasing_Raw	0.2	5.09544e-05	0.18	0.000403201
Tiller_Number_Non_Productive_Raw	Spike_Density	-0.02	0.655154	0.05	0.362848
Tiller_Number_Non_Productive_Raw	Tiller_Number_Productive_Raw	-0.06	0.225084	-0.09	0.0781691
Tiller_Number_Non_Productive_Raw	Tiller_Number_Week_2	0.35	1.20037e-12	0.39	2.66454e-15
Tiller_Number_Non_Productive_Raw	Tiller_Number_Week_3_Raw	0.33	4.49218e-11	0.33	1.87481e-11
Tiller_Number_Non_Productive_Raw	Tiller_Number_Week_4	0.44	0	0.4	2.22045e-16
Tiller_Number_Non_Productive_Raw	Tiller_Number_Week_5_Raw	0.42	0	0.37	1.10578e-13
Tiller_Number_Non_Productive_Raw	Tiller_Number_Week_6_Raw	0.36	1.86962e-13	0.3	2.87434e-09
Tiller_Number_Non_Productive_Raw	Tiller_Number_Week_7_Raw	0.21	3.32945e-05	0.12	0.0180867
Tiller_Number_Non_Productive_Raw	Tillering_Rate	0.47	0	0.43	0
Tiller_Number_Non_Productive_Raw	Weeks_Increasing_Raw	-0.3	1.91431e-09	-0.43	0
Tiller_Number_Productive_Raw	Spike_Density	-0.03	0.512215	0.04	0.430462
Tiller_Number_Productive_Raw	Tiller_Number_Week_2	0.4	0	0.38	1.82077e-14
Tiller_Number_Productive_Raw	Tiller_Number_Week_3_Raw	0.58	0	0.56	0
Tiller_Number_Productive_Raw	Tiller_Number_Week_4	0.65	0	0.65	0
Tiller_Number_Productive_Raw	Tiller_Number_Week_5_Raw	0.79	0	0.79	0
Tiller_Number_Productive_Raw	Tiller_Number_Week_6_Raw	0.86	0	0.87	0
Tiller_Number_Productive_Raw	Tiller_Number_Week_7_Raw	0.91	0	0.92	0
Tiller_Number_Productive_Raw	Tillering_Rate	0.77	0	0.75	0
Tiller_Number_Productive_Raw	Weeks_Increasing_Raw	0.35	2.19202e-12	0.33	3.00964e-11
Tiller_Number_Week_2	Spike_Density	0.05	0.333481	0.06	0.290858
Tiller_Number_Week_2	Tiller_Number_Week_3_Raw	0.82	0	0.83	0
Tiller_Number_Week_2	Tiller_Number_Week_4	0.77	0	0.76	0
Tiller_Number_Week_2	Tiller_Number_Week_5_Raw	0.68	0	0.65	0
Tiller_Number_Week_2	Tiller_Number_Week_6_Raw	0.57	0	0.54	0
Tiller_Number_Week_2	Tiller_Number_Week_7_Raw	0.41	0	0.4	4.44089e-16
Tiller_Number_Week_2	Tillering_Rate	0.65	0	0.65	0
Tiller_Number_Week_2	Weeks_Increasing_Raw	-0.33	2.02063e-11	-0.34	4.26281e-12
Tiller_Number_Week_3_Raw	Spike_Density	0.03	0.613117	0.06	0.266076
Tiller_Number_Week_3_Raw	Tiller_Number_Week_4	0.89	0	0.88	0
Tiller_Number_Week_3_Raw	Tiller_Number_Week_5_Raw	0.79	0	0.78	0
Tiller_Number_Week_3_Raw	Tiller_Number_Week_6_Raw	0.72	0	0.7	0
Tiller_Number_Week_3_Raw	Tiller_Number_Week_7_Raw	0.56	0	0.54	0
Tiller_Number_Week_3_Raw	Tillering_Rate	0.77	0	0.77	0
Tiller_Number_Week_3_Raw	Weeks_Increasing_Raw	-0.22	1.36748e-05	-0.24	1.31749e-06
Tiller_Number_Week_4	Spike_Density	-0.01	0.912531	0.03	0.62834
Tiller_Number_Week_4	Tiller_Number_Week_5_Raw	0.91	0	0.9	0
Tiller_Number_Week_4	Tiller_Number_Week_6_Raw	0.83	0	0.81	0
Tiller_Number_Week_4	Tiller_Number_Week_7_Raw	0.68	0	0.66	0
Tiller_Number_Week_4	Tillering_Rate	0.89	0	0.88	0
Tiller_Number_Week_4	Weeks_Increasing_Raw	-0.21	2.77342e-05	-0.22	1.42774e-05
Tiller_Number_Week_5_Raw	Spike_Density	-0.03	0.597182	0.02	0.761489
Tiller_Number_Week_5_Raw	Tiller_Number_Week_6_Raw	0.93	0	0.93	0
Tiller_Number_Week_5_Raw	Tiller_Number_Week_7_Raw	0.83	0	0.82	0
Tiller_Number_Week_5_Raw	Tillering_Rate	0.93	0	0.92	0
Tiller_Number_Week_5_Raw	Weeks_Increasing_Raw	-0.04	0.438883	-0.06	0.218259
Tiller_Number_Week_6_Raw	Spike_Density	-0.01	0.881132	0.05	0.335911
Tiller_Number_Week_6_Raw	Tiller_Number_Week_7_Raw	0.89	0	0.89	0
Tiller_Number_Week_6_Raw	Tillering_Rate	0.9	0	0.89	0
Tiller_Number_Week_6_Raw	Weeks_Increasing_Raw	0.13	0.013031	0.1	0.0540185
Tiller_Number_Week_7_Raw	Spike_Density	-0.04	0.459392	0	0.933229
Tiller_Number_Week_7_Raw	Tillering_Rate	0.79	0	0.77	0
Tiller_Number_Week_7_Raw	Weeks_Increasing_Raw	0.35	1.80478e-12	0.33	5.4768e-11
Weeks_Increasing_Raw	Spike_Density	-0.05	0.342016	-0.05	0.299577
Weeks_Increasing_Raw	Tillering_Rate	-0.18	0.000276619	-0.2	6.59064e-05

## Sheet: 2014_6-Row
Trait 1	Trait 2	Pearson Correlation	Pearson p-value	Spearman Correlation	Spearman p-value
Days_to_Heading_Raw	Fifty_Kernel_Weight_Raw	-0.07	0.175943	-0.03	0.613271
Days_to_Heading_Raw	Percent_Productive_Tillers	0.38	3.35287e-14	0.25	5.08104e-07
Days_to_Heading_Raw	Plant_Height_Raw	0.21	5.61064e-05	0.25	4.81894e-07
Days_to_Heading_Raw	Seeds_Per_Spike_Raw	-0.04	0.416936	0.08	0.13129
Days_to_Heading_Raw	Spike_Density	-0.17	0.00147345	-0.11	0.0418675
Days_to_Heading_Raw	Spike_Length_Raw	0.16	0.00282694	0.26	8.33876e-07
Days_to_Heading_Raw	Spike_Row_Type	0	0.94707	-0.03	0.562573
Days_to_Heading_Raw	Stem_Diameter_Raw	0.01	0.823802	0.15	0.00696467
Days_to_Heading_Raw	Tiller_Number_Maximum_Raw	0.48	0	0.38	1.39888e-14
Days_to_Heading_Raw	Tiller_Number_Non_Productive_Raw	-0.17	0.000726821	-0.09	0.0900194
Days_to_Heading_Raw	Tiller_Number_Productive_Raw	0.59	0	0.41	0
Days_to_Heading_Raw	Tiller_Number_Week_2	-0.17	0.000827968	-0.17	0.000904942
Days_to_Heading_Raw	Tiller_Number_Week_3_Raw	-0.1	0.0563983	-0.08	0.124135
Days_to_Heading_Raw	Tiller_Number_Week_4	0.01	0.873024	0.02	0.73014
Days_to_Heading_Raw	Tiller_Number_Week_5_Raw	0.21	2.9382e-05	0.22	1.52909e-05
Days_to_Heading_Raw	Tiller_Number_Week_6_Raw	0.41	0	0.35	1.25411e-12
Days_to_Heading_Raw	Tiller_Number_Week_7_Raw	0.57	0	0.45	0
Days_to_Heading_Raw	Tillering_Rate	0.25	8.35881e-07	0.2	5.81705e-05
Days_to_Heading_Raw	Weeks_Increasing_Raw	0.56	0	0.49	0
Fifty_Kernel_Weight_Raw	Percent_Productive_Tillers	0.07	0.157175	0.06	0.286005
Fifty_Kernel_Weight_Raw	Plant_Height_Raw	0.27	2.26254e-07	0.24	2.28736e-06
Fifty_Kernel_Weight_Raw	Seeds_Per_Spike_Raw	0.06	0.290035	0.08	0.139736
Fifty_Kernel_Weight_Raw	Spike_Density	-0.05	0.315491	-0.03	0.576621
Fifty_Kernel_Weight_Raw	Spike_Length_Raw	0.14	0.0121817	0.1	0.0608483
Fifty_Kernel_Weight_Raw	Spike_Row_Type	0.11	0.0382397	0.11	0.0292994
Fifty_Kernel_Weight_Raw	Stem_Diameter_Raw	0.12	0.0298486	0.1	0.0818693
Fifty_Kernel_Weight_Raw	Tiller_Number_Maximum_Raw	-0.07	0.158089	-0.05	0.367323
Fifty_Kernel_Weight_Raw	Tiller_Number_Non_Productive_Raw	-0.12	0.0198098	-0.06	0.271488
Fifty_Kernel_Weight_Raw	Tiller_Number_Productive_Raw	-0.02	0.65687	0	0.955294
Fifty_Kernel_Weight_Raw	Tiller_Number_Week_2	-0.04	0.403678	-0.04	0.476816
Fifty_Kernel_Weight_Raw	Tiller_Number_Week_3_Raw	0.03	0.613813	0.03	0.529544
Fifty_Kernel_Weight_Raw	Tiller_Number_Week_4	-0.06	0.290659	-0.04	0.418726
Fifty_Kernel_Weight_Raw	Tiller_Number_Week_5_Raw	-0.07	0.203142	-0.04	0.479484
Fifty_Kernel_Weight_Raw	Tiller_Number_Week_6_Raw	-0.03	0.592211	0	0.934799
Fifty_Kernel_Weight_Raw	Tiller_Number_Week_7_Raw	-0.03	0.586348	-0.01	0.820222
Fifty_Kernel_Weight_Raw	Tillering_Rate	-0.07	0.188419	-0.04	0.434812
Fifty_Kernel_Weight_Raw	Weeks_Increasing_Raw	-0.03	0.561746	-0.02	0.764187
Percent_Productive_Tillers	Plant_Height_Raw	0.07	0.181479	0.02	0.727918
Percent_Productive_Tillers	Seeds_Per_Spike_Raw	-0.1	0.051812	-0.12	0.0190081
Percent_Productive_Tillers	Spike_Density	-0.09	0.0765459	-0.08	0.140714
Percent_Productive_Tillers	Spike_Length_Raw	-0.05	0.396759	-0.07	0.184616
Percent_Productive_Tillers	Spike_Row_Type	0.04	0.464043	0.04	0.432897
Percent_Productive_Tillers	Stem_Diameter_Raw	-0.04	0.451124	-0.08	0.157838
Percent_Productive_Tillers	Tiller_Number_Maximum_Raw	0.23	5.14859e-06	0.19	0.000190043
Percent_Productive_Tillers	Tiller_Number_Non_Productive_Raw	-0.71	0	-0.81	0
Percent_Productive_Tillers	Tiller_Number_Productive_Raw	0.57	0	0.55	0
Percent_Productive_Tillers	Tiller_Number_Week_2	-0.13	0.0116813	-0.15	0.00373211
Percent_Productive_Tillers	Tiller_Number_Week_3_Raw	-0.09	0.0659516	-0.12	0.0148395
Percent_Productive_Tillers	Tiller_Number_Week_4	-0.02	0.624835	-0.05	0.29534
Percent_Productive_Tillers	Tiller_Number_Week_5_Raw	0.04	0.445155	0.01	0.771026
Percent_Productive_Tillers	Tiller_Number_Week_6_Raw	0.23	6.97907e-06	0.2	5.58195e-05
Percent_Productive_Tillers	Tiller_Number_Week_7_Raw	0.42	0	0.4	0
Percent_Productive_Tillers	Tillering_Rate	0.04	0.468826	0	0.954057
Percent_Productive_Tillers	Weeks_Increasing_Raw	0.53	0	0.53	0
Plant_Height_Raw	Seeds_Per_Spike_Raw	0.43	0	0.43	0
Plant_Height_Raw	Spike_Density	0.06	0.290302	0.07	0.225369
Plant_Height_Raw	Spike_Length_Raw	0.52	0	0.5	0
Plant_Height_Raw	Spike_Row_Type	0.02	0.658889	0.02	0.765
Plant_Height_Raw	Stem_Diameter_Raw	0.54	0	0.52	0
Plant_Height_Raw	Tiller_Number_Maximum_Raw	0.44	0	0.5	0
Plant_Height_Raw	Tiller_Number_Non_Productive_Raw	0.22	1.53302e-05	0.26	2.53222e-07
Plant_Height_Raw	Tiller_Number_Productive_Raw	0.37	5.9508e-14	0.43	0
Plant_Height_Raw	Tiller_Number_Week_2	0.43	0	0.43	0
Plant_Height_Raw	Tiller_Number_Week_3_Raw	0.51	0	0.52	0
Plant_Height_Raw	Tiller_Number_Week_4	0.48	0	0.51	0
Plant_Height_Raw	Tiller_Number_Week_5_Raw	0.47	0	0.52	0
Plant_Height_Raw	Tiller_Number_Week_6_Raw	0.46	0	0.51	0
Plant_Height_Raw	Tiller_Number_Week_7_Raw	0.39	1.11022e-15	0.43	0
Plant_Height_Raw	Tillering_Rate	0.47	0	0.51	0
Plant_Height_Raw	Weeks_Increasing_Raw	0.01	0.90691	0.01	0.90942
Ppd_H1_Geno	Days_to_Heading_Raw	0.24	1.53955e-06	0.29	7.43627e-09
Ppd_H1_Geno	Fifty_Kernel_Weight_Raw	0.01	0.918048	0.02	0.665438
Ppd_H1_Geno	Percent_Productive_Tillers	0.05	0.32638	0.06	0.227844
Ppd_H1_Geno	Plant_Height_Raw	0.21	3.55879e-05	0.2	6.59166e-05
Ppd_H1_Geno	Seeds_Per_Spike_Raw	0.21	4.39334e-05	0.21	3.39894e-05
Ppd_H1_Geno	Spike_Density	0	0.999464	0.02	0.701967
Ppd_H1_Geno	Spike_Length_Raw	0.32	3.92618e-10	0.32	4.39206e-10
Ppd_H1_Geno	Spike_Row_Type	0.07	0.161438	0.07	0.161438
Ppd_H1_Geno	Stem_Diameter_Raw	0.37	8.70282e-12	0.36	5.70803e-11
Ppd_H1_Geno	Tiller_Number_Maximum_Raw	0.13	0.0109451	0.17	0.00111732
Ppd_H1_Geno	Tiller_Number_Non_Productive_Raw	-0.04	0.445465	-0.01	0.826914
Ppd_H1_Geno	Tiller_Number_Productive_Raw	0.15	0.00225588	0.16	0.00218488
Ppd_H1_Geno	Tiller_Number_Week_2	0.01	0.77127	0.02	0.726251
Ppd_H1_Geno	Tiller_Number_Week_3_Raw	0.04	0.447249	0.04	0.419597
Ppd_H1_Geno	Tiller_Number_Week_4	0.06	0.273886	0.07	0.151464
Ppd_H1_Geno	Tiller_Number_Week_5_Raw	0.07	0.186452	0.1	0.0438319
Ppd_H1_Geno	Tiller_Number_Week_6_Raw	0.1	0.046012	0.13	0.00821743
Ppd_H1_Geno	Tiller_Number_Week_7_Raw	0.14	0.00655616	0.16	0.00207355
Ppd_H1_Geno	Tillering_Rate	0.09	0.0813431	0.12	0.0162276
Ppd_H1_Geno	Weeks_Increasing_Raw	0.12	0.0208336	0.12	0.0221682
Seeds_Per_Spike_Raw	Spike_Density	0.71	0	0.74	0
Seeds_Per_Spike_Raw	Spike_Length_Raw	0.39	2.17604e-14	0.4	6.43929e-15
Seeds_Per_Spike_Raw	Spike_Row_Type	-0.06	0.281669	-0.03	0.525232
Seeds_Per_Spike_Raw	Stem_Diameter_Raw	0.54	0	0.55	0
Seeds_Per_Spike_Raw	Tiller_Number_Maximum_Raw	0.06	0.239714	0.12	0.0221309
Seeds_Per_Spike_Raw	Tiller_Number_Non_Productive_Raw	0.19	0.000185436	0.2	6.4364e-05
Seeds_Per_Spike_Raw	Tiller_Number_Productive_Raw	-0.02	0.662413	0.06	0.285227
Seeds_Per_Spike_Raw	Tiller_Number_Week_2	0.21	4.41033e-05	0.2	0.000129602
Seeds_Per_Spike_Raw	Tiller_Number_Week_3_Raw	0.24	3.87708e-06	0.24	2.64899e-06
Seeds_Per_Spike_Raw	Tiller_Number_Week_4	0.19	0.000239669	0.2	7.62247e-05
Seeds_Per_Spike_Raw	Tiller_Number_Week_5_Raw	0.15	0.00440516	0.17	0.000714382
Seeds_Per_Spike_Raw	Tiller_Number_Week_6_Raw	0.07	0.178505	0.13	0.0153455
Seeds_Per_Spike_Raw	Tiller_Number_Week_7_Raw	-0.01	0.839979	0.06	0.287039
Seeds_Per_Spike_Raw	Tillering_Rate	0.14	0.0085528	0.17	0.00117634
Seeds_Per_Spike_Raw	Weeks_Increasing_Raw	-0.12	0.0182558	-0.13	0.0136676
Spike_Density	Tillering_Rate	-0.08	0.159486	-0.02	0.685082
Spike_Length_Raw	Spike_Density	-0.33	3.90162e-10	-0.25	1.80221e-06
Spike_Length_Raw	Spike_Row_Type	0.07	0.198679	0.07	0.194097
Spike_Length_Raw	Stem_Diameter_Raw	0.46	2.22045e-16	0.45	2.22045e-16
Spike_Length_Raw	Tiller_Number_Maximum_Raw	0.25	1.33522e-06	0.27	1.42527e-07
Spike_Length_Raw	Tiller_Number_Non_Productive_Raw	0.22	2.31753e-05	0.22	2.2755e-05
Spike_Length_Raw	Tiller_Number_Productive_Raw	0.17	0.00151725	0.19	0.000366018
Spike_Length_Raw	Tiller_Number_Week_2	0.26	1.04021e-06	0.24	4.23709e-06
Spike_Length_Raw	Tiller_Number_Week_3_Raw	0.28	6.44408e-08	0.25	1.21472e-06
Spike_Length_Raw	Tiller_Number_Week_4	0.27	1.97663e-07	0.26	6.93794e-07
Spike_Length_Raw	Tiller_Number_Week_5_Raw	0.26	5.18163e-07	0.27	3.58992e-07
Spike_Length_Raw	Tiller_Number_Week_6_Raw	0.24	6.09292e-06	0.26	1.01767e-06
Spike_Length_Raw	Tiller_Number_Week_7_Raw	0.19	0.000257548	0.21	5.13631e-05
Spike_Length_Raw	Tillering_Rate	0.27	1.78428e-07	0.28	9.21705e-08
Spike_Length_Raw	Weeks_Increasing_Raw	0.01	0.916365	0.01	0.923877
Spike_Row_Type	Spike_Density	-0.11	0.0365589	-0.12	0.0281311
Spike_Row_Type	Tillering_Rate	0.03	0.616141	0.03	0.567613
Stem_Diameter_Raw	Spike_Density	0.23	7.31597e-05	0.26	1.06186e-05
Stem_Diameter_Raw	Spike_Row_Type	0.05	0.410883	0.01	0.811143
Stem_Diameter_Raw	Tiller_Number_Maximum_Raw	0.22	8.73918e-05	0.33	2.12691e-09
Stem_Diameter_Raw	Tiller_Number_Non_Productive_Raw	0.23	3.0919e-05	0.25	5.755e-06
Stem_Diameter_Raw	Tiller_Number_Productive_Raw	0.13	0.0232729	0.25	4.1116e-06
Stem_Diameter_Raw	Tiller_Number_Week_2	0.35	1.98807e-10	0.33	2.00588e-09
Stem_Diameter_Raw	Tiller_Number_Week_3_Raw	0.4	1.48992e-13	0.39	8.36442e-13
Stem_Diameter_Raw	Tiller_Number_Week_4	0.37	4.91429e-12	0.39	5.76872e-13
Stem_Diameter_Raw	Tiller_Number_Week_5_Raw	0.3	3.91085e-08	0.35	1.41853e-10
Stem_Diameter_Raw	Tiller_Number_Week_6_Raw	0.22	8.94105e-05	0.31	1.00371e-08
Stem_Diameter_Raw	Tiller_Number_Week_7_Raw	0.13	0.0221865	0.25	4.22475e-06
Stem_Diameter_Raw	Tillering_Rate	0.3	3.63995e-08	0.35	7.09024e-11
Stem_Diameter_Raw	Weeks_Increasing_Raw	-0.11	0.0528649	-0.11	0.0571671
Tiller_Number_Maximum_Raw	Spike_Density	-0.13	0.0138931	-0.07	0.21211
Tiller_Number_Maximum_Raw	Spike_Row_Type	0.02	0.69587	0.03	0.546736
Tiller_Number_Maximum_Raw	Tiller_Number_Non_Productive_Raw	0.35	2.87059e-12	0.31	5.57303e-10
Tiller_Number_Maximum_Raw	Tiller_Number_Productive_Raw	0.9	0	0.9	0
Tiller_Number_Maximum_Raw	Tiller_Number_Week_2	0.52	0	0.58	0
Tiller_Number_Maximum_Raw	Tiller_Number_Week_3_Raw	0.61	0	0.66	0
Tiller_Number_Maximum_Raw	Tiller_Number_Week_4	0.75	0	0.8	0
Tiller_Number_Maximum_Raw	Tiller_Number_Week_5_Raw	0.9	0	0.93	0
Tiller_Number_Maximum_Raw	Tiller_Number_Week_6_Raw	0.95	0	0.96	0
Tiller_Number_Maximum_Raw	Tiller_Number_Week_7_Raw	0.94	0	0.92	0
Tiller_Number_Maximum_Raw	Tillering_Rate	0.92	0	0.92	0
Tiller_Number_Maximum_Raw	Weeks_Increasing_Raw	0.27	7.98115e-08	0.24	2.6005e-06
Tiller_Number_Non_Productive_Raw	Spike_Density	0.03	0.540238	0.05	0.316439
Tiller_Number_Non_Productive_Raw	Spike_Row_Type	-0.04	0.389903	-0.03	0.548135
Tiller_Number_Non_Productive_Raw	Tiller_Number_Productive_Raw	-0.09	0.0829261	-0.06	0.205217
Tiller_Number_Non_Productive_Raw	Tiller_Number_Week_2	0.49	0	0.48	0
Tiller_Number_Non_Productive_Raw	Tiller_Number_Week_3_Raw	0.52	0	0.49	0
Tiller_Number_Non_Productive_Raw	Tiller_Number_Week_4	0.54	0	0.49	0
Tiller_Number_Non_Productive_Raw	Tiller_Number_Week_5_Raw	0.55	0	0.47	0
Tiller_Number_Non_Productive_Raw	Tiller_Number_Week_6_Raw	0.35	9.37028e-13	0.3	3.07459e-09
Tiller_Number_Non_Productive_Raw	Tiller_Number_Week_7_Raw	0.1	0.0481655	0.08	0.0952296
Tiller_Number_Non_Productive_Raw	Tillering_Rate	0.53	0	0.47	0
Tiller_Number_Non_Productive_Raw	Weeks_Increasing_Raw	-0.36	1.35891e-13	-0.41	0
Tiller_Number_Productive_Raw	Spike_Density	-0.16	0.00367894	-0.07	0.182565
Tiller_Number_Productive_Raw	Spike_Row_Type	0.04	0.420341	0.05	0.348942
Tiller_Number_Productive_Raw	Tiller_Number_Week_2	0.33	2.14602e-11	0.42	0
Tiller_Number_Productive_Raw	Tiller_Number_Week_3_Raw	0.41	0	0.5	0
Tiller_Number_Productive_Raw	Tiller_Number_Week_4	0.55	0	0.64	0
Tiller_Number_Productive_Raw	Tiller_Number_Week_5_Raw	0.7	0	0.77	0
Tiller_Number_Productive_Raw	Tiller_Number_Week_6_Raw	0.85	0	0.88	0
Tiller_Number_Productive_Raw	Tiller_Number_Week_7_Raw	0.95	0	0.95	0
Tiller_Number_Productive_Raw	Tillering_Rate	0.73	0	0.75	0
Tiller_Number_Productive_Raw	Weeks_Increasing_Raw	0.45	0	0.41	0
Tiller_Number_Week_2	Spike_Density	0.02	0.73251	0.01	0.809252
Tiller_Number_Week_2	Spike_Row_Type	0.07	0.148259	0.08	0.128086
Tiller_Number_Week_2	Tiller_Number_Week_3_Raw	0.86	0	0.86	0
Tiller_Number_Week_2	Tiller_Number_Week_4	0.82	0	0.8	0
Tiller_Number_Week_2	Tiller_Number_Week_5_Raw	0.68	0	0.7	0
Tiller_Number_Week_2	Tiller_Number_Week_6_Raw	0.56	0	0.59	0
Tiller_Number_Week_2	Tiller_Number_Week_7_Raw	0.37	4.35207e-14	0.43	0
Tiller_Number_Week_2	Tillering_Rate	0.67	0	0.69	0
Tiller_Number_Week_2	Weeks_Increasing_Raw	-0.28	1.64852e-08	-0.26	2.74363e-07
Tiller_Number_Week_3_Raw	Spike_Density	0.01	0.893687	0.03	0.559104
Tiller_Number_Week_3_Raw	Spike_Row_Type	0.04	0.427565	0.04	0.403289
Tiller_Number_Week_3_Raw	Tiller_Number_Week_4	0.85	0	0.84	0
Tiller_Number_Week_3_Raw	Tiller_Number_Week_5_Raw	0.76	0	0.78	0
Tiller_Number_Week_3_Raw	Tiller_Number_Week_6_Raw	0.63	0	0.68	0
Tiller_Number_Week_3_Raw	Tiller_Number_Week_7_Raw	0.46	0	0.52	0
Tiller_Number_Week_3_Raw	Tillering_Rate	0.74	0	0.75	0
Tiller_Number_Week_3_Raw	Weeks_Increasing_Raw	-0.23	6.63624e-06	-0.2	7.65551e-05
Tiller_Number_Week_4	Spike_Density	-0.02	0.650964	0.02	0.773114
Tiller_Number_Week_4	Spike_Row_Type	0.05	0.333704	0.05	0.35026
Tiller_Number_Week_4	Tiller_Number_Week_5_Raw	0.89	0	0.9	0
Tiller_Number_Week_4	Tiller_Number_Week_6_Raw	0.77	0	0.8	0
Tiller_Number_Week_4	Tiller_Number_Week_7_Raw	0.6	0	0.66	0
Tiller_Number_Week_4	Tillering_Rate	0.87	0	0.88	0
Tiller_Number_Week_4	Weeks_Increasing_Raw	-0.17	0.00103024	-0.16	0.00197702
Tiller_Number_Week_5_Raw	Spike_Density	-0.06	0.281606	0	0.938287
Tiller_Number_Week_5_Raw	Spike_Row_Type	0.01	0.788148	0.02	0.643403
Tiller_Number_Week_5_Raw	Tiller_Number_Week_6_Raw	0.92	0	0.93	0
Tiller_Number_Week_5_Raw	Tiller_Number_Week_7_Raw	0.78	0	0.81	0
Tiller_Number_Week_5_Raw	Tillering_Rate	0.94	0	0.93	0
Tiller_Number_Week_5_Raw	Weeks_Increasing_Raw	0.02	0.750339	0.03	0.602203
Tiller_Number_Week_6_Raw	Spike_Density	-0.11	0.033566	-0.05	0.32074
Tiller_Number_Week_6_Raw	Spike_Row_Type	0	0.985513	0.02	0.699984
Tiller_Number_Week_6_Raw	Tiller_Number_Week_7_Raw	0.91	0	0.92	0
Tiller_Number_Week_6_Raw	Tillering_Rate	0.88	0	0.88	0
Tiller_Number_Week_6_Raw	Weeks_Increasing_Raw	0.25	6.46122e-07	0.25	4.85412e-07
Tiller_Number_Week_7_Raw	Spike_Density	-0.15	0.00390158	-0.09	0.0976349
Tiller_Number_Week_7_Raw	Spike_Row_Type	0.03	0.590105	0.03	0.571093
Tiller_Number_Week_7_Raw	Tillering_Rate	0.78	0	0.77	0
Tiller_Number_Week_7_Raw	Weeks_Increasing_Raw	0.43	0	0.42	0
Weeks_Increasing_Raw	Spike_Density	-0.12	0.0206189	-0.14	0.0104267
Weeks_Increasing_Raw	Spike_Row_Type	0.01	0.789691	0.01	0.883602
Weeks_Increasing_Raw	Tillering_Rate	-0.1	0.0565798	-0.12	0.0216904

## Sheet: 2014_Ppd-H1_D
Trait 1	Trait 2	Pearson Correlation	Pearson p-value	Spearman Correlation	Spearman p-value
Days_to_Heading_Raw	Fifty_Kernel_Weight_Raw	-0.09	0.0956619	-0.09	0.116572
Days_to_Heading_Raw	Percent_Productive_Tillers	0.23	2.08578e-05	0.08	0.147236
Days_to_Heading_Raw	Plant_Height_Raw	0.16	0.0036768	0.23	4.3225e-05
Days_to_Heading_Raw	Seeds_Per_Spike_Raw	0.14	0.0141492	0.25	6.27173e-06
Days_to_Heading_Raw	Spike_Density	0.06	0.334087	0.13	0.0264187
Days_to_Heading_Raw	Spike_Length_Raw	0.01	0.854214	0.12	0.0372297
Days_to_Heading_Raw	Spike_Row_Type	0.1	0.0844292	0.17	0.00202229
Days_to_Heading_Raw	Stem_Diameter_Raw	-0.07	0.273451	0.16	0.00912091
Days_to_Heading_Raw	Tiller_Number_Maximum_Raw	0.43	8.88178e-16	0.26	2.14248e-06
Days_to_Heading_Raw	Tiller_Number_Non_Productive_Raw	-0.06	0.280997	0.04	0.526398
Days_to_Heading_Raw	Tiller_Number_Productive_Raw	0.51	0	0.25	3.48402e-06
Days_to_Heading_Raw	Tiller_Number_Week_2	-0.15	0.00718161	-0.19	0.000497703
Days_to_Heading_Raw	Tiller_Number_Week_3_Raw	-0.1	0.0731518	-0.13	0.0203834
Days_to_Heading_Raw	Tiller_Number_Week_4	0.02	0.777503	-0.02	0.685181
Days_to_Heading_Raw	Tiller_Number_Week_5_Raw	0.23	2.46941e-05	0.17	0.00202493
Days_to_Heading_Raw	Tiller_Number_Week_6_Raw	0.39	4.50306e-13	0.23	1.97956e-05
Days_to_Heading_Raw	Tiller_Number_Week_7_Raw	0.51	0	0.32	6.27233e-09
Days_to_Heading_Raw	Tillering_Rate	0.23	3.72616e-05	0.13	0.0181431
Days_to_Heading_Raw	Weeks_Increasing_Raw	0.47	0	0.35	5.67495e-11
Fifty_Kernel_Weight_Raw	Percent_Productive_Tillers	0.09	0.120396	0.08	0.139357
Fifty_Kernel_Weight_Raw	Plant_Height_Raw	0.12	0.0359516	0.11	0.0534775
Fifty_Kernel_Weight_Raw	Seeds_Per_Spike_Raw	-0.28	4.82314e-07	-0.3	1.01871e-07
Fifty_Kernel_Weight_Raw	Spike_Density	-0.39	4.73799e-12	-0.41	2.04725e-13
Fifty_Kernel_Weight_Raw	Spike_Length_Raw	0.3	1.80253e-07	0.28	1.10828e-06
Fifty_Kernel_Weight_Raw	Spike_Row_Type	-0.44	4.44089e-16	-0.45	0
Fifty_Kernel_Weight_Raw	Stem_Diameter_Raw	-0.01	0.817745	-0.02	0.782425
Fifty_Kernel_Weight_Raw	Tiller_Number_Maximum_Raw	-0.05	0.355732	-0.03	0.550874
Fifty_Kernel_Weight_Raw	Tiller_Number_Non_Productive_Raw	-0.13	0.0177537	-0.09	0.097071
Fifty_Kernel_Weight_Raw	Tiller_Number_Productive_Raw	0.01	0.863709	0.01	0.853598
Fifty_Kernel_Weight_Raw	Tiller_Number_Week_2	0.15	0.00763674	0.15	0.00919427
Fifty_Kernel_Weight_Raw	Tiller_Number_Week_3_Raw	0.12	0.0343477	0.11	0.0618309
Fifty_Kernel_Weight_Raw	Tiller_Number_Week_4	0.02	0.704908	0.04	0.503023
Fifty_Kernel_Weight_Raw	Tiller_Number_Week_5_Raw	-0.06	0.305018	-0.03	0.62365
Fifty_Kernel_Weight_Raw	Tiller_Number_Week_6_Raw	-0.02	0.672165	0	0.955023
Fifty_Kernel_Weight_Raw	Tiller_Number_Week_7_Raw	-0.01	0.793613	-0.01	0.858309
Fifty_Kernel_Weight_Raw	Tillering_Rate	-0.05	0.365316	-0.02	0.78285
Fifty_Kernel_Weight_Raw	Weeks_Increasing_Raw	-0.01	0.834665	-0.02	0.723724
Percent_Productive_Tillers	Plant_Height_Raw	-0.01	0.85121	-0.03	0.574541
Percent_Productive_Tillers	Seeds_Per_Spike_Raw	-0.13	0.0201562	-0.14	0.0134406
Percent_Productive_Tillers	Spike_Density	-0.1	0.0944242	-0.11	0.0532054
Percent_Productive_Tillers	Spike_Length_Raw	-0.06	0.295168	-0.05	0.339447
Percent_Productive_Tillers	Spike_Row_Type	-0.11	0.0445583	-0.11	0.0476945
Percent_Productive_Tillers	Stem_Diameter_Raw	-0.19	0.00155986	-0.22	0.000433221
Percent_Productive_Tillers	Tiller_Number_Maximum_Raw	0.11	0.0376113	0.11	0.0540805
Percent_Productive_Tillers	Tiller_Number_Non_Productive_Raw	-0.74	0	-0.82	0
Percent_Productive_Tillers	Tiller_Number_Productive_Raw	0.5	0	0.5	0
Percent_Productive_Tillers	Tiller_Number_Week_2	-0.1	0.0729887	-0.11	0.0470688
Percent_Productive_Tillers	Tiller_Number_Week_3_Raw	-0.07	0.17722	-0.09	0.0872979
Percent_Productive_Tillers	Tiller_Number_Week_4	-0.06	0.263497	-0.06	0.26399
Percent_Productive_Tillers	Tiller_Number_Week_5_Raw	-0.01	0.789105	-0.02	0.722833
Percent_Productive_Tillers	Tiller_Number_Week_6_Raw	0.15	0.00722545	0.15	0.00519238
Percent_Productive_Tillers	Tiller_Number_Week_7_Raw	0.33	1.20647e-09	0.34	3.89251e-10
Percent_Productive_Tillers	Tillering_Rate	-0.06	0.307882	-0.07	0.203298
Percent_Productive_Tillers	Weeks_Increasing_Raw	0.46	0	0.47	0
Plant_Height_Raw	Seeds_Per_Spike_Raw	0.43	1.33227e-15	0.42	8.65974e-15
Plant_Height_Raw	Spike_Density	0.16	0.00606188	0.15	0.0114745
Plant_Height_Raw	Spike_Length_Raw	0.38	6.68132e-12	0.37	3.91693e-11
Plant_Height_Raw	Spike_Row_Type	0.19	0.000664277	0.18	0.000895947
Plant_Height_Raw	Stem_Diameter_Raw	0.49	0	0.5	0
Plant_Height_Raw	Tiller_Number_Maximum_Raw	0.39	2.70228e-13	0.46	0
Plant_Height_Raw	Tiller_Number_Non_Productive_Raw	0.23	3.02089e-05	0.27	1.09999e-06
Plant_Height_Raw	Tiller_Number_Productive_Raw	0.32	4.18872e-09	0.39	2.04503e-13
Plant_Height_Raw	Tiller_Number_Week_2	0.36	2.52487e-11	0.37	7.38964e-12
Plant_Height_Raw	Tiller_Number_Week_3_Raw	0.44	0	0.47	0
Plant_Height_Raw	Tiller_Number_Week_4	0.44	0	0.48	0
Plant_Height_Raw	Tiller_Number_Week_5_Raw	0.44	2.22045e-16	0.49	0
Plant_Height_Raw	Tiller_Number_Week_6_Raw	0.41	1.44329e-14	0.47	0
Plant_Height_Raw	Tiller_Number_Week_7_Raw	0.33	5.80693e-10	0.4	5.55112e-14
Plant_Height_Raw	Tillering_Rate	0.42	1.55431e-15	0.47	0
Plant_Height_Raw	Weeks_Increasing_Raw	-0.05	0.350228	-0.04	0.517416
Seeds_Per_Spike_Raw	Spike_Density	0.82	0	0.87	0
Seeds_Per_Spike_Raw	Spike_Length_Raw	0.08	0.174515	0.03	0.63022
Seeds_Per_Spike_Raw	Spike_Row_Type	0.59	0	0.65	0
Seeds_Per_Spike_Raw	Stem_Diameter_Raw	0.53	0	0.53	0
Seeds_Per_Spike_Raw	Tiller_Number_Maximum_Raw	0.14	0.0124881	0.16	0.00469263
Seeds_Per_Spike_Raw	Tiller_Number_Non_Productive_Raw	0.23	4.79999e-05	0.21	0.000147522
Seeds_Per_Spike_Raw	Tiller_Number_Productive_Raw	0.04	0.458941	0.08	0.140421
Seeds_Per_Spike_Raw	Tiller_Number_Week_2	-0.04	0.442171	-0.06	0.256056
Seeds_Per_Spike_Raw	Tiller_Number_Week_3_Raw	0.06	0.259136	0.07	0.23528
Seeds_Per_Spike_Raw	Tiller_Number_Week_4	0.12	0.0308193	0.12	0.0358736
Seeds_Per_Spike_Raw	Tiller_Number_Week_5_Raw	0.19	0.000683848	0.19	0.000511099
Seeds_Per_Spike_Raw	Tiller_Number_Week_6_Raw	0.14	0.0118085	0.16	0.0051078
Seeds_Per_Spike_Raw	Tiller_Number_Week_7_Raw	0.08	0.175684	0.12	0.035014
Seeds_Per_Spike_Raw	Tillering_Rate	0.17	0.00277259	0.17	0.00221534
Seeds_Per_Spike_Raw	Weeks_Increasing_Raw	-0.05	0.350124	-0.08	0.174474
Spike_Density	Tillering_Rate	0.02	0.763229	0.03	0.658476
Spike_Length_Raw	Spike_Density	-0.45	0	-0.42	2.44249e-14
Spike_Length_Raw	Spike_Row_Type	-0.31	4.23136e-08	-0.3	5.81436e-08
Spike_Length_Raw	Stem_Diameter_Raw	0.28	9.79796e-06	0.28	6.21784e-06
Spike_Length_Raw	Tiller_Number_Maximum_Raw	0.14	0.0163346	0.16	0.0038586
Spike_Length_Raw	Tiller_Number_Non_Productive_Raw	0.17	0.00313848	0.13	0.0282273
Spike_Length_Raw	Tiller_Number_Productive_Raw	0.07	0.236666	0.1	0.0754691
Spike_Length_Raw	Tiller_Number_Week_2	0.26	4.43759e-06	0.25	6.18193e-06
Spike_Length_Raw	Tiller_Number_Week_3_Raw	0.23	3.61572e-05	0.22	0.000110372
Spike_Length_Raw	Tiller_Number_Week_4	0.2	0.000321908	0.19	0.000615603
Spike_Length_Raw	Tiller_Number_Week_5_Raw	0.17	0.00315277	0.17	0.00276579
Spike_Length_Raw	Tiller_Number_Week_6_Raw	0.13	0.0255483	0.15	0.0073025
Spike_Length_Raw	Tiller_Number_Week_7_Raw	0.09	0.112788	0.12	0.0312826
Spike_Length_Raw	Tillering_Rate	0.17	0.00321142	0.17	0.00239895
Spike_Length_Raw	Weeks_Increasing_Raw	-0.04	0.527729	-0.03	0.589168
Spike_Row_Type	Spike_Density	0.65	0	0.7	0
Spike_Row_Type	Tillering_Rate	0.07	0.197507	0.05	0.407023
Stem_Diameter_Raw	Spike_Density	0.32	3.29834e-07	0.33	9.14105e-08
Stem_Diameter_Raw	Spike_Row_Type	0.28	3.26128e-06	0.28	5.66441e-06
Stem_Diameter_Raw	Tiller_Number_Maximum_Raw	0.11	0.0711423	0.24	0.000119246
Stem_Diameter_Raw	Tiller_Number_Non_Productive_Raw	0.31	1.85504e-07	0.34	1.40801e-08
Stem_Diameter_Raw	Tiller_Number_Productive_Raw	-0.03	0.616974	0.15	0.0163794
Stem_Diameter_Raw	Tiller_Number_Week_2	0.2	0.00147679	0.22	0.000369968
Stem_Diameter_Raw	Tiller_Number_Week_3_Raw	0.24	0.00011852	0.27	9.99143e-06
Stem_Diameter_Raw	Tiller_Number_Week_4	0.29	2.42832e-06	0.31	2.12896e-07
Stem_Diameter_Raw	Tiller_Number_Week_5_Raw	0.22	0.000246502	0.28	4.88734e-06
Stem_Diameter_Raw	Tiller_Number_Week_6_Raw	0.11	0.0737349	0.22	0.000378829
Stem_Diameter_Raw	Tiller_Number_Week_7_Raw	-0.01	0.885763	0.15	0.0139589
Stem_Diameter_Raw	Tillering_Rate	0.25	3.49576e-05	0.32	1.40884e-07
Stem_Diameter_Raw	Weeks_Increasing_Raw	-0.24	9.82306e-05	-0.22	0.000270438
Tiller_Number_Maximum_Raw	Spike_Density	0	0.974703	0.01	0.796376
Tiller_Number_Maximum_Raw	Spike_Row_Type	0.05	0.402657	0.03	0.536404
Tiller_Number_Maximum_Raw	Tiller_Number_Non_Productive_Raw	0.43	2.22045e-16	0.37	2.55529e-12
Tiller_Number_Maximum_Raw	Tiller_Number_Productive_Raw	0.89	0	0.89	0
Tiller_Number_Maximum_Raw	Tiller_Number_Week_2	0.55	0	0.6	0
Tiller_Number_Maximum_Raw	Tiller_Number_Week_3_Raw	0.65	0	0.71	0
Tiller_Number_Maximum_Raw	Tiller_Number_Week_4	0.8	0	0.84	0
Tiller_Number_Maximum_Raw	Tiller_Number_Week_5_Raw	0.93	0	0.94	0
Tiller_Number_Maximum_Raw	Tiller_Number_Week_6_Raw	0.95	0	0.95	0
Tiller_Number_Maximum_Raw	Tiller_Number_Week_7_Raw	0.93	0	0.91	0
Tiller_Number_Maximum_Raw	Tillering_Rate	0.92	0	0.91	0
Tiller_Number_Maximum_Raw	Weeks_Increasing_Raw	0.24	1.70064e-05	0.21	0.00013313
Tiller_Number_Non_Productive_Raw	Spike_Density	0.09	0.101079	0.12	0.0428203
Tiller_Number_Non_Productive_Raw	Spike_Row_Type	0.13	0.0221754	0.13	0.0216255
Tiller_Number_Non_Productive_Raw	Tiller_Number_Productive_Raw	-0.02	0.705115	-0.02	0.732748
Tiller_Number_Non_Productive_Raw	Tiller_Number_Week_2	0.39	2.98872e-13	0.41	1.11022e-14
Tiller_Number_Non_Productive_Raw	Tiller_Number_Week_3_Raw	0.45	0	0.45	0
Tiller_Number_Non_Productive_Raw	Tiller_Number_Week_4	0.53	0	0.49	0
Tiller_Number_Non_Productive_Raw	Tiller_Number_Week_5_Raw	0.55	0	0.49	0
Tiller_Number_Non_Productive_Raw	Tiller_Number_Week_6_Raw	0.39	1.98508e-13	0.33	9.68651e-10
Tiller_Number_Non_Productive_Raw	Tiller_Number_Week_7_Raw	0.18	0.00118404	0.14	0.0126427
Tiller_Number_Non_Productive_Raw	Tillering_Rate	0.57	0	0.52	0
Tiller_Number_Non_Productive_Raw	Weeks_Increasing_Raw	-0.27	4.93035e-07	-0.36	2.54508e-11
Tiller_Number_Productive_Raw	Spike_Density	-0.05	0.424157	-0.02	0.710864
Tiller_Number_Productive_Raw	Spike_Row_Type	-0.01	0.828501	-0.01	0.800483
Tiller_Number_Productive_Raw	Tiller_Number_Week_2	0.41	5.32907e-15	0.47	0
Tiller_Number_Productive_Raw	Tiller_Number_Week_3_Raw	0.5	0	0.56	0
Tiller_Number_Productive_Raw	Tiller_Number_Week_4	0.62	0	0.69	0
Tiller_Number_Productive_Raw	Tiller_Number_Week_5_Raw	0.75	0	0.79	0
Tiller_Number_Productive_Raw	Tiller_Number_Week_6_Raw	0.86	0	0.88	0
Tiller_Number_Productive_Raw	Tiller_Number_Week_7_Raw	0.94	0	0.94	0
Tiller_Number_Productive_Raw	Tillering_Rate	0.73	0	0.74	0
Tiller_Number_Productive_Raw	Weeks_Increasing_Raw	0.4	6.52811e-14	0.36	1.04285e-11
Tiller_Number_Week_2	Spike_Density	-0.19	0.00101293	-0.21	0.000281895
Tiller_Number_Week_2	Spike_Row_Type	-0.21	0.000140161	-0.19	0.000539818
Tiller_Number_Week_2	Tiller_Number_Week_3_Raw	0.86	0	0.86	0
Tiller_Number_Week_2	Tiller_Number_Week_4	0.79	0	0.79	0
Tiller_Number_Week_2	Tiller_Number_Week_5_Raw	0.65	0	0.68	0
Tiller_Number_Week_2	Tiller_Number_Week_6_Raw	0.56	0	0.59	0
Tiller_Number_Week_2	Tiller_Number_Week_7_Raw	0.42	3.55271e-15	0.47	0
Tiller_Number_Week_2	Tillering_Rate	0.64	0	0.68	0
Tiller_Number_Week_2	Weeks_Increasing_Raw	-0.2	0.000244143	-0.18	0.000833719
Tiller_Number_Week_3_Raw	Spike_Density	-0.1	0.0842554	-0.09	0.109106
Tiller_Number_Week_3_Raw	Spike_Row_Type	-0.09	0.0899923	-0.07	0.210871
Tiller_Number_Week_3_Raw	Tiller_Number_Week_4	0.85	0	0.86	0
Tiller_Number_Week_3_Raw	Tiller_Number_Week_5_Raw	0.75	0	0.78	0
Tiller_Number_Week_3_Raw	Tiller_Number_Week_6_Raw	0.66	0	0.7	0
Tiller_Number_Week_3_Raw	Tiller_Number_Week_7_Raw	0.52	0	0.56	0
Tiller_Number_Week_3_Raw	Tillering_Rate	0.74	0	0.78	0
Tiller_Number_Week_3_Raw	Weeks_Increasing_Raw	-0.17	0.00174183	-0.16	0.00367976
Tiller_Number_Week_4	Spike_Density	-0.04	0.532487	-0.03	0.592929
Tiller_Number_Week_4	Spike_Row_Type	0	0.975448	-0.01	0.848547
Tiller_Number_Week_4	Tiller_Number_Week_5_Raw	0.89	0	0.91	0
Tiller_Number_Week_4	Tiller_Number_Week_6_Raw	0.81	0	0.83	0
Tiller_Number_Week_4	Tiller_Number_Week_7_Raw	0.63	0	0.69	0
Tiller_Number_Week_4	Tillering_Rate	0.89	0	0.91	0
Tiller_Number_Week_4	Weeks_Increasing_Raw	-0.14	0.0118737	-0.13	0.0181776
Tiller_Number_Week_5_Raw	Spike_Density	0.03	0.586754	0.05	0.396356
Tiller_Number_Week_5_Raw	Spike_Row_Type	0.08	0.133459	0.06	0.254864
Tiller_Number_Week_5_Raw	Tiller_Number_Week_6_Raw	0.93	0	0.93	0
Tiller_Number_Week_5_Raw	Tiller_Number_Week_7_Raw	0.81	0	0.82	0
Tiller_Number_Week_5_Raw	Tillering_Rate	0.94	0	0.93	0
Tiller_Number_Week_5_Raw	Weeks_Increasing_Raw	0.04	0.495051	0.04	0.441851
Tiller_Number_Week_6_Raw	Spike_Density	0	0.960524	0.02	0.776596
Tiller_Number_Week_6_Raw	Spike_Row_Type	0.04	0.436604	0.03	0.573106
Tiller_Number_Week_6_Raw	Tiller_Number_Week_7_Raw	0.9	0	0.91	0
Tiller_Number_Week_6_Raw	Tillering_Rate	0.88	0	0.86	0
Tiller_Number_Week_6_Raw	Weeks_Increasing_Raw	0.23	2.01845e-05	0.24	1.25699e-05
Tiller_Number_Week_7_Raw	Spike_Density	-0.03	0.648993	0	0.962875
Tiller_Number_Week_7_Raw	Spike_Row_Type	0.01	0.793705	0.01	0.804913
Tiller_Number_Week_7_Raw	Tillering_Rate	0.78	0	0.75	0
Tiller_Number_Week_7_Raw	Weeks_Increasing_Raw	0.39	1.50546e-13	0.39	2.8022e-13
Weeks_Increasing_Raw	Spike_Density	-0.05	0.35761	-0.06	0.279646
Weeks_Increasing_Raw	Spike_Row_Type	-0.07	0.231723	-0.08	0.171185
Weeks_Increasing_Raw	Tillering_Rate	-0.13	0.0189545	-0.16	0.00287647

## Sheet: 2014_ppd-H1_r
Trait 1	Trait 2	Pearson Correlation	Pearson p-value	Spearman Correlation	Spearman p-value
Days_to_Heading_Raw	Fifty_Kernel_Weight_Raw	-0.32	1.21281e-11	-0.28	5.77988e-09
Days_to_Heading_Raw	Percent_Productive_Tillers	0.24	2.85069e-07	0.22	4.49349e-06
Days_to_Heading_Raw	Plant_Height_Raw	-0.08	0.0853173	-0.07	0.160405
Days_to_Heading_Raw	Seeds_Per_Spike_Raw	-0.22	7.12103e-06	-0.19	8.44618e-05
Days_to_Heading_Raw	Spike_Density	-0.22	1.14786e-05	-0.18	0.000349824
Days_to_Heading_Raw	Spike_Length_Raw	-0.06	0.208281	0.03	0.499716
Days_to_Heading_Raw	Spike_Row_Type	-0.1	0.045188	-0.16	0.000964483
Days_to_Heading_Raw	Stem_Diameter_Raw	-0.06	0.26365	-0.01	0.793148
Days_to_Heading_Raw	Tiller_Number_Maximum_Raw	0.26	2.92851e-08	0.28	2.55344e-09
Days_to_Heading_Raw	Tiller_Number_Non_Productive_Raw	-0.12	0.014159	-0.12	0.0136976
Days_to_Heading_Raw	Tiller_Number_Productive_Raw	0.32	8.01692e-12	0.29	4.94317e-10
Days_to_Heading_Raw	Tiller_Number_Week_2	-0.22	3.09159e-06	-0.19	6.12652e-05
Days_to_Heading_Raw	Tiller_Number_Week_3_Raw	-0.2	1.4702e-05	-0.2	2.78109e-05
Days_to_Heading_Raw	Tiller_Number_Week_4	-0.13	0.00503583	-0.1	0.0423723
Days_to_Heading_Raw	Tiller_Number_Week_5_Raw	0.03	0.569416	0.07	0.117019
Days_to_Heading_Raw	Tiller_Number_Week_6_Raw	0.19	7.16331e-05	0.24	2.73407e-07
Days_to_Heading_Raw	Tiller_Number_Week_7_Raw	0.3	6.79599e-11	0.32	8.14504e-12
Days_to_Heading_Raw	Tillering_Rate	0.09	0.047718	0.11	0.0209723
Days_to_Heading_Raw	Weeks_Increasing_Raw	0.4	0	0.4	0
Fifty_Kernel_Weight_Raw	Percent_Productive_Tillers	0.27	1.48877e-08	0.25	2.01743e-07
Fifty_Kernel_Weight_Raw	Plant_Height_Raw	0.28	8.82663e-09	0.28	4.8278e-09
Fifty_Kernel_Weight_Raw	Seeds_Per_Spike_Raw	-0.18	0.000316396	-0.13	0.0103266
Fifty_Kernel_Weight_Raw	Spike_Density	-0.26	1.36623e-07	-0.24	1.86193e-06
Fifty_Kernel_Weight_Raw	Spike_Length_Raw	0.29	6.32326e-09	0.29	4.75752e-09
Fifty_Kernel_Weight_Raw	Spike_Row_Type	-0.31	5.65401e-11	-0.3	1.93348e-10
Fifty_Kernel_Weight_Raw	Stem_Diameter_Raw	-0.13	0.0118934	-0.12	0.0195794
Fifty_Kernel_Weight_Raw	Tiller_Number_Maximum_Raw	0.1	0.0335706	0.11	0.0229087
Fifty_Kernel_Weight_Raw	Tiller_Number_Non_Productive_Raw	-0.18	0.000240432	-0.18	0.000229364
Fifty_Kernel_Weight_Raw	Tiller_Number_Productive_Raw	0.18	0.00017709	0.21	1.92041e-05
Fifty_Kernel_Weight_Raw	Tiller_Number_Week_2	0.2	5.30523e-05	0.17	0.000313783
Fifty_Kernel_Weight_Raw	Tiller_Number_Week_3_Raw	0.26	5.25935e-08	0.25	3.45761e-07
Fifty_Kernel_Weight_Raw	Tiller_Number_Week_4	0.13	0.00913525	0.11	0.029328
Fifty_Kernel_Weight_Raw	Tiller_Number_Week_5_Raw	0.11	0.0246962	0.11	0.021552
Fifty_Kernel_Weight_Raw	Tiller_Number_Week_6_Raw	0.14	0.0037458	0.14	0.00330587
Fifty_Kernel_Weight_Raw	Tiller_Number_Week_7_Raw	0.15	0.00234253	0.17	0.000579482
Fifty_Kernel_Weight_Raw	Tillering_Rate	0.05	0.313402	0.05	0.313995
Fifty_Kernel_Weight_Raw	Weeks_Increasing_Raw	0.14	0.00519253	0.14	0.00451924
Percent_Productive_Tillers	Plant_Height_Raw	0.12	0.00928702	0.08	0.102725
Percent_Productive_Tillers	Seeds_Per_Spike_Raw	-0.2	2.56479e-05	-0.15	0.00147211
Percent_Productive_Tillers	Spike_Density	-0.27	2.55486e-08	-0.21	2.2658e-05
Percent_Productive_Tillers	Spike_Length_Raw	0.18	0.000196362	0.17	0.000687294
Percent_Productive_Tillers	Spike_Row_Type	-0.21	1.04499e-05	-0.17	0.000242402
Percent_Productive_Tillers	Stem_Diameter_Raw	-0.07	0.147477	-0.09	0.0883875
Percent_Productive_Tillers	Tiller_Number_Maximum_Raw	0.24	2.61119e-07	0.21	9.50859e-06
Percent_Productive_Tillers	Tiller_Number_Non_Productive_Raw	-0.75	0	-0.87	0
Percent_Productive_Tillers	Tiller_Number_Productive_Raw	0.57	0	0.55	0
Percent_Productive_Tillers	Tiller_Number_Week_2	-0.08	0.108997	-0.14	0.00375198
Percent_Productive_Tillers	Tiller_Number_Week_3_Raw	-0.01	0.807496	-0.08	0.0900527
Percent_Productive_Tillers	Tiller_Number_Week_4	-0.02	0.738196	-0.07	0.128281
Percent_Productive_Tillers	Tiller_Number_Week_5_Raw	0.06	0.213827	0.01	0.838749
Percent_Productive_Tillers	Tiller_Number_Week_6_Raw	0.2	1.61509e-05	0.16	0.000542161
Percent_Productive_Tillers	Tiller_Number_Week_7_Raw	0.38	2.22045e-16	0.35	1.77636e-14
Percent_Productive_Tillers	Tillering_Rate	0.04	0.430357	-0.02	0.640911
Percent_Productive_Tillers	Weeks_Increasing_Raw	0.57	0	0.6	0
Plant_Height_Raw	Seeds_Per_Spike_Raw	0.27	1.72539e-08	0.29	1.29784e-09
Plant_Height_Raw	Spike_Density	0.05	0.27339	0.06	0.192978
Plant_Height_Raw	Spike_Length_Raw	0.42	0	0.4	0
Plant_Height_Raw	Spike_Row_Type	0.07	0.138268	0.07	0.121613
Plant_Height_Raw	Stem_Diameter_Raw	0.48	0	0.44	0
Plant_Height_Raw	Tiller_Number_Maximum_Raw	0.37	8.88178e-16	0.36	6.66134e-15
Plant_Height_Raw	Tiller_Number_Non_Productive_Raw	0.1	0.0402782	0.09	0.0542624
Plant_Height_Raw	Tiller_Number_Productive_Raw	0.34	1.8896e-13	0.33	1.18883e-12
Plant_Height_Raw	Tiller_Number_Week_2	0.35	6.01741e-14	0.33	2.17115e-12
Plant_Height_Raw	Tiller_Number_Week_3_Raw	0.45	0	0.44	0
Plant_Height_Raw	Tiller_Number_Week_4	0.41	0	0.39	0
Plant_Height_Raw	Tiller_Number_Week_5_Raw	0.42	0	0.41	0
Plant_Height_Raw	Tiller_Number_Week_6_Raw	0.39	0	0.37	4.44089e-16
Plant_Height_Raw	Tiller_Number_Week_7_Raw	0.31	1.81681e-11	0.3	1.17985e-10
Plant_Height_Raw	Tillering_Rate	0.41	0	0.4	0
Plant_Height_Raw	Weeks_Increasing_Raw	-0.07	0.152006	-0.08	0.100085
Seeds_Per_Spike_Raw	Spike_Density	0.91	0	0.87	0
Seeds_Per_Spike_Raw	Spike_Length_Raw	-0.19	0.000136418	-0.11	0.0206112
Seeds_Per_Spike_Raw	Spike_Row_Type	0.77	0	0.71	0
Seeds_Per_Spike_Raw	Stem_Diameter_Raw	0.59	0	0.49	0
Seeds_Per_Spike_Raw	Tiller_Number_Maximum_Raw	-0.15	0.00179723	-0.07	0.12616
Seeds_Per_Spike_Raw	Tiller_Number_Non_Productive_Raw	0.09	0.0706007	0.11	0.0270926
Seeds_Per_Spike_Raw	Tiller_Number_Productive_Raw	-0.19	6.11782e-05	-0.11	0.0206997
Seeds_Per_Spike_Raw	Tiller_Number_Week_2	-0.15	0.00153511	-0.12	0.0150163
Seeds_Per_Spike_Raw	Tiller_Number_Week_3_Raw	-0.05	0.271678	0.01	0.877404
Seeds_Per_Spike_Raw	Tiller_Number_Week_4	-0.05	0.324468	-0.01	0.768148
Seeds_Per_Spike_Raw	Tiller_Number_Week_5_Raw	-0.07	0.125549	-0.02	0.668857
Seeds_Per_Spike_Raw	Tiller_Number_Week_6_Raw	-0.18	0.000164792	-0.1	0.0382161
Seeds_Per_Spike_Raw	Tiller_Number_Week_7_Raw	-0.21	1.2149e-05	-0.13	0.00586181
Seeds_Per_Spike_Raw	Tillering_Rate	-0.03	0.568759	0.03	0.478035
Seeds_Per_Spike_Raw	Weeks_Increasing_Raw	-0.28	2.7958e-09	-0.24	2.98464e-07
Spike_Density	Tillering_Rate	-0.13	0.0071399	-0.05	0.28944
Spike_Length_Raw	Spike_Density	-0.53	0	-0.53	0
Spike_Length_Raw	Spike_Row_Type	-0.43	0	-0.44	0
Spike_Length_Raw	Stem_Diameter_Raw	0.05	0.30269	0.03	0.599715
Spike_Length_Raw	Tiller_Number_Maximum_Raw	0.23	2.04905e-06	0.24	7.52051e-07
Spike_Length_Raw	Tiller_Number_Non_Productive_Raw	0.01	0.857369	-0.01	0.837721
Spike_Length_Raw	Tiller_Number_Productive_Raw	0.23	1.8817e-06	0.26	1.04359e-07
Spike_Length_Raw	Tiller_Number_Week_2	0.31	9.14591e-11	0.29	2.65005e-09
Spike_Length_Raw	Tiller_Number_Week_3_Raw	0.3	3.42555e-10	0.27	1.15421e-08
Spike_Length_Raw	Tiller_Number_Week_4	0.26	9.13113e-08	0.23	1.92141e-06
Spike_Length_Raw	Tiller_Number_Week_5_Raw	0.24	5.12871e-07	0.23	1.79401e-06
Spike_Length_Raw	Tiller_Number_Week_6_Raw	0.27	3.56116e-08	0.26	9.15402e-08
Spike_Length_Raw	Tiller_Number_Week_7_Raw	0.24	5.55296e-07	0.26	5.14959e-08
Spike_Length_Raw	Tillering_Rate	0.22	3.8996e-06	0.21	1.82027e-05
Spike_Length_Raw	Weeks_Increasing_Raw	0.05	0.336011	0.06	0.203235
Spike_Row_Type	Spike_Density	0.82	0	0.76	0
Spike_Row_Type	Tillering_Rate	-0.12	0.0127931	-0.11	0.023492
Stem_Diameter_Raw	Spike_Density	0.49	0	0.36	7.79066e-12
Stem_Diameter_Raw	Spike_Row_Type	0.47	0	0.46	0
Stem_Diameter_Raw	Tiller_Number_Maximum_Raw	0.1	0.0580343	0.11	0.0256303
Stem_Diameter_Raw	Tiller_Number_Non_Productive_Raw	0.13	0.010123	0.12	0.020862
Stem_Diameter_Raw	Tiller_Number_Productive_Raw	0.05	0.355791	0.06	0.254388
Stem_Diameter_Raw	Tiller_Number_Week_2	0.06	0.220987	0.03	0.574646
Stem_Diameter_Raw	Tiller_Number_Week_3_Raw	0.16	0.00219621	0.15	0.00435487
Stem_Diameter_Raw	Tiller_Number_Week_4	0.17	0.000963439	0.16	0.00158099
Stem_Diameter_Raw	Tiller_Number_Week_5_Raw	0.15	0.00265748	0.15	0.00427564
Stem_Diameter_Raw	Tiller_Number_Week_6_Raw	0.09	0.0910849	0.09	0.0761897
Stem_Diameter_Raw	Tiller_Number_Week_7_Raw	0.05	0.382063	0.05	0.335688
Stem_Diameter_Raw	Tillering_Rate	0.19	0.000253592	0.19	0.000262898
Stem_Diameter_Raw	Weeks_Increasing_Raw	-0.22	2.18427e-05	-0.21	5.64197e-05
Tiller_Number_Maximum_Raw	Spike_Density	-0.24	1.11124e-06	-0.16	0.00135179
Tiller_Number_Maximum_Raw	Spike_Row_Type	-0.19	5.27611e-05	-0.19	4.03067e-05
Tiller_Number_Maximum_Raw	Tiller_Number_Non_Productive_Raw	0.27	4.2325e-09	0.19	5.24247e-05
Tiller_Number_Maximum_Raw	Tiller_Number_Productive_Raw	0.91	0	0.91	0
Tiller_Number_Maximum_Raw	Tiller_Number_Week_2	0.5	0	0.49	0
Tiller_Number_Maximum_Raw	Tiller_Number_Week_3_Raw	0.64	0	0.61	0
Tiller_Number_Maximum_Raw	Tiller_Number_Week_4	0.75	0	0.73	0
Tiller_Number_Maximum_Raw	Tiller_Number_Week_5_Raw	0.88	0	0.88	0
Tiller_Number_Maximum_Raw	Tiller_Number_Week_6_Raw	0.95	0	0.95	0
Tiller_Number_Maximum_Raw	Tiller_Number_Week_7_Raw	0.94	0	0.93	0
Tiller_Number_Maximum_Raw	Tillering_Rate	0.91	0	0.9	0
Tiller_Number_Maximum_Raw	Weeks_Increasing_Raw	0.21	9.67274e-06	0.18	0.000154506
Tiller_Number_Non_Productive_Raw	Spike_Density	0.06	0.192512	0.11	0.024475
Tiller_Number_Non_Productive_Raw	Spike_Row_Type	0.02	0.658626	0.04	0.44621
Tiller_Number_Non_Productive_Raw	Tiller_Number_Productive_Raw	-0.14	0.00338227	-0.18	0.000170981
Tiller_Number_Non_Productive_Raw	Tiller_Number_Week_2	0.36	3.55271e-15	0.38	0
Tiller_Number_Non_Productive_Raw	Tiller_Number_Week_3_Raw	0.36	2.22045e-15	0.36	2.22045e-15
Tiller_Number_Non_Productive_Raw	Tiller_Number_Week_4	0.45	0	0.4	0
Tiller_Number_Non_Productive_Raw	Tiller_Number_Week_5_Raw	0.44	0	0.36	2.66454e-15
Tiller_Number_Non_Productive_Raw	Tiller_Number_Week_6_Raw	0.32	5.74096e-12	0.23	6.58539e-07
Tiller_Number_Non_Productive_Raw	Tiller_Number_Week_7_Raw	0.12	0.0135348	0.03	0.588435
Tiller_Number_Non_Productive_Raw	Tillering_Rate	0.45	0	0.39	0
Tiller_Number_Non_Productive_Raw	Weeks_Increasing_Raw	-0.41	0	-0.51	0
Tiller_Number_Productive_Raw	Spike_Density	-0.27	2.86587e-08	-0.2	4.31582e-05
Tiller_Number_Productive_Raw	Spike_Row_Type	-0.2	1.31703e-05	-0.24	4.64861e-07
Tiller_Number_Productive_Raw	Tiller_Number_Week_2	0.36	1.77636e-15	0.37	8.88178e-16
Tiller_Number_Productive_Raw	Tiller_Number_Week_3_Raw	0.51	0	0.48	0
Tiller_Number_Productive_Raw	Tiller_Number_Week_4	0.58	0	0.58	0
Tiller_Number_Productive_Raw	Tiller_Number_Week_5_Raw	0.73	0	0.73	0
Tiller_Number_Productive_Raw	Tiller_Number_Week_6_Raw	0.84	0	0.86	0
Tiller_Number_Productive_Raw	Tiller_Number_Week_7_Raw	0.92	0	0.92	0
Tiller_Number_Productive_Raw	Tillering_Rate	0.75	0	0.73	0
Tiller_Number_Productive_Raw	Weeks_Increasing_Raw	0.38	0	0.37	8.88178e-16
Tiller_Number_Week_2	Spike_Density	-0.25	3.87912e-07	-0.2	6.4723e-05
Tiller_Number_Week_2	Spike_Row_Type	-0.35	2.88658e-14	-0.36	8.88178e-15
Tiller_Number_Week_2	Tiller_Number_Week_3_Raw	0.83	0	0.82	0
Tiller_Number_Week_2	Tiller_Number_Week_4	0.77	0	0.76	0
Tiller_Number_Week_2	Tiller_Number_Week_5_Raw	0.67	0	0.65	0
Tiller_Number_Week_2	Tiller_Number_Week_6_Raw	0.58	0	0.56	0
Tiller_Number_Week_2	Tiller_Number_Week_7_Raw	0.4	0	0.4	0
Tiller_Number_Week_2	Tillering_Rate	0.62	0	0.62	0
Tiller_Number_Week_2	Weeks_Increasing_Raw	-0.3	9.34586e-11	-0.31	2.19111e-11
Tiller_Number_Week_3_Raw	Spike_Density	-0.18	0.00028375	-0.1	0.0457137
Tiller_Number_Week_3_Raw	Spike_Row_Type	-0.25	1.34562e-07	-0.23	8.91276e-07
Tiller_Number_Week_3_Raw	Tiller_Number_Week_4	0.87	0	0.85	0
Tiller_Number_Week_3_Raw	Tiller_Number_Week_5_Raw	0.78	0	0.76	0
Tiller_Number_Week_3_Raw	Tiller_Number_Week_6_Raw	0.7	0	0.67	0
Tiller_Number_Week_3_Raw	Tiller_Number_Week_7_Raw	0.52	0	0.49	0
Tiller_Number_Week_3_Raw	Tillering_Rate	0.74	0	0.72	0
Tiller_Number_Week_3_Raw	Weeks_Increasing_Raw	-0.23	7.09557e-07	-0.27	1.33439e-08
Tiller_Number_Week_4	Spike_Density	-0.15	0.00178354	-0.1	0.0436368
Tiller_Number_Week_4	Spike_Row_Type	-0.19	4.60891e-05	-0.19	7.96519e-05
Tiller_Number_Week_4	Tiller_Number_Week_5_Raw	0.9	0	0.88	0
Tiller_Number_Week_4	Tiller_Number_Week_6_Raw	0.8	0	0.77	0
Tiller_Number_Week_4	Tiller_Number_Week_7_Raw	0.64	0	0.61	0
Tiller_Number_Week_4	Tillering_Rate	0.86	0	0.84	0
Tiller_Number_Week_4	Weeks_Increasing_Raw	-0.23	7.39533e-07	-0.25	1.07931e-07
Tiller_Number_Week_5_Raw	Spike_Density	-0.18	0.000390291	-0.11	0.0219798
Tiller_Number_Week_5_Raw	Spike_Row_Type	-0.17	0.000251456	-0.17	0.00030168
Tiller_Number_Week_5_Raw	Tiller_Number_Week_6_Raw	0.92	0	0.91	0
Tiller_Number_Week_5_Raw	Tiller_Number_Week_7_Raw	0.79	0	0.78	0
Tiller_Number_Week_5_Raw	Tillering_Rate	0.93	0	0.91	0
Tiller_Number_Week_5_Raw	Weeks_Increasing_Raw	-0.08	0.0931183	-0.1	0.0296468
Tiller_Number_Week_6_Raw	Spike_Density	-0.28	1.755e-08	-0.19	0.000144852
Tiller_Number_Week_6_Raw	Spike_Row_Type	-0.25	7.7299e-08	-0.25	7.07828e-08
Tiller_Number_Week_6_Raw	Tiller_Number_Week_7_Raw	0.89	0	0.89	0
Tiller_Number_Week_6_Raw	Tillering_Rate	0.89	0	0.87	0
Tiller_Number_Week_6_Raw	Weeks_Increasing_Raw	0.13	0.00503336	0.11	0.0183546
Tiller_Number_Week_7_Raw	Spike_Density	-0.3	1.32244e-09	-0.23	2.57115e-06
Tiller_Number_Week_7_Raw	Spike_Row_Type	-0.24	4.72273e-07	-0.25	9.29642e-08
Tiller_Number_Week_7_Raw	Tillering_Rate	0.78	0	0.75	0
Tiller_Number_Week_7_Raw	Weeks_Increasing_Raw	0.37	1.33227e-15	0.35	3.06422e-14
Weeks_Increasing_Raw	Spike_Density	-0.26	6.68822e-08	-0.24	8.89764e-07
Weeks_Increasing_Raw	Spike_Row_Type	-0.21	8.95072e-06	-0.2	2.18764e-05
Weeks_Increasing_Raw	Tillering_Rate	-0.19	6.87909e-05	-0.21	8.24867e-06

## Sheet: 2015_All
Trait 1	Trait 2	Pearson Correlation	Pearson p-value	Spearman Correlation	Spearman p-value
Days_to_Heading_Raw	Fifty_Kernel_Weight_Raw	-0.13	0.000322075	-0.09	0.0136585
Days_to_Heading_Raw	Leaf_Width_Raw	0.18	7.75691e-07	0.15	2.30291e-05
Days_to_Heading_Raw	Lodging	0.04	0.259081	0.05	0.158563
Days_to_Heading_Raw	Percent_Productive_Tillers	-0.42	0	-0.43	0
Days_to_Heading_Raw	Plant_Height_Raw	0.35	0	0.35	0
Days_to_Heading_Raw	Seeds_Per_Spike_Raw	0.02	0.55976	0.04	0.244327
Days_to_Heading_Raw	Spike_Density	-0.07	0.0407049	-0.1	0.00596383
Days_to_Heading_Raw	Spike_Length_Raw	0.25	2.53619e-12	0.32	0
Days_to_Heading_Raw	Spike_Row_Type	-0.05	0.148881	-0.11	0.00305387
Days_to_Heading_Raw	Stem_Diameter_Raw	0.03	0.366317	0.02	0.588692
Days_to_Heading_Raw	Tiller_Number_Maximum_Raw	0.46	0	0.46	0
Days_to_Heading_Raw	Tiller_Number_Non_Productive_Raw	0.49	0	0.53	0
Days_to_Heading_Raw	Tiller_Number_Productive_Raw	0.09	0.0187659	0.12	0.00117542
Days_to_Heading_Raw	Tiller_Number_Week_2	0.02	0.618111	0.06	0.106829
Days_to_Heading_Raw	Tiller_Number_Week_3_Raw	0.15	3.04997e-05	0.19	1.99962e-07
Days_to_Heading_Raw	Tiller_Number_Week_4	0.37	0	0.41	0
Days_to_Heading_Raw	Tiller_Number_Week_5_Raw	0.51	0	0.53	0
Days_to_Heading_Raw	Tiller_Number_Week_6_Raw	0.49	0	0.49	0
Days_to_Heading_Raw	Tiller_Number_Week_7_Raw	0.38	0	0.36	0
Days_to_Heading_Raw	Tillering_Rate	0.5	0	0.52	0
Days_to_Heading_Raw	Weeks_Increasing_Raw	-0.18	2.79937e-07	-0.22	8.50754e-10
Fifty_Kernel_Weight_Raw	Leaf_Width_Raw	-0.25	5.07905e-12	-0.26	5.09814e-13
Fifty_Kernel_Weight_Raw	Lodging	-0.07	0.0549826	-0.11	0.00338704
Fifty_Kernel_Weight_Raw	Percent_Productive_Tillers	0.23	1.83504e-10	0.23	3.41731e-10
Fifty_Kernel_Weight_Raw	Plant_Height_Raw	0.06	0.0995455	0.05	0.139437
Fifty_Kernel_Weight_Raw	Seeds_Per_Spike_Raw	-0.53	0	-0.56	0
Fifty_Kernel_Weight_Raw	Spike_Density	-0.54	0	-0.56	0
Fifty_Kernel_Weight_Raw	Spike_Length_Raw	0.37	0	0.39	0
Fifty_Kernel_Weight_Raw	Spike_Row_Type	-0.52	0	-0.55	0
Fifty_Kernel_Weight_Raw	Stem_Diameter_Raw	-0.18	4.51329e-07	-0.2	1.62955e-08
Fifty_Kernel_Weight_Raw	Tiller_Number_Maximum_Raw	0.06	0.107963	0.12	0.000535325
Fifty_Kernel_Weight_Raw	Tiller_Number_Non_Productive_Raw	-0.13	0.000271727	-0.1	0.00805355
Fifty_Kernel_Weight_Raw	Tiller_Number_Productive_Raw	0.27	2.88658e-14	0.31	0
Fifty_Kernel_Weight_Raw	Tiller_Number_Week_2	0.19	2.01513e-07	0.19	1.15051e-07
Fifty_Kernel_Weight_Raw	Tiller_Number_Week_3_Raw	0.26	1.72085e-13	0.3	0
Fifty_Kernel_Weight_Raw	Tiller_Number_Week_4	0.08	0.0184347	0.11	0.00287965
Fifty_Kernel_Weight_Raw	Tiller_Number_Week_5_Raw	0.05	0.160537	0.11	0.00206882
Fifty_Kernel_Weight_Raw	Tiller_Number_Week_6_Raw	0.05	0.202109	0.11	0.00209756
Fifty_Kernel_Weight_Raw	Tiller_Number_Week_7_Raw	0.14	0.000111783	0.2	1.76491e-08
Fifty_Kernel_Weight_Raw	Tillering_Rate	0	0.898274	0.05	0.176707
Fifty_Kernel_Weight_Raw	Weeks_Increasing_Raw	0.16	6.42398e-06	0.18	5.0931e-07
Leaf_Width_Raw	Lodging	0.14	0.000291742	0.15	7.75499e-05
Leaf_Width_Raw	Percent_Productive_Tillers	-0.13	0.000252856	-0.13	0.000229673
Leaf_Width_Raw	Plant_Height_Raw	0.2	7.22769e-08	0.2	3.46078e-08
Leaf_Width_Raw	Seeds_Per_Spike_Raw	0.57	0	0.57	0
Leaf_Width_Raw	Spike_Density	0.49	0	0.51	0
Leaf_Width_Raw	Spike_Length_Raw	-0.21	1.16941e-08	-0.24	3.63949e-11
Leaf_Width_Raw	Spike_Row_Type	0.5	0	0.51	0
Leaf_Width_Raw	Stem_Diameter_Raw	0.58	0	0.57	0
Leaf_Width_Raw	Tiller_Number_Maximum_Raw	-0.3	0	-0.32	0
Leaf_Width_Raw	Tiller_Number_Non_Productive_Raw	-0.07	0.0722311	-0.06	0.120472
Leaf_Width_Raw	Tiller_Number_Productive_Raw	-0.39	0	-0.4	0
Leaf_Width_Raw	Tiller_Number_Week_2	-0.2	5.77271e-08	-0.2	6.51134e-08
Leaf_Width_Raw	Tiller_Number_Week_3_Raw	-0.32	0	-0.34	0
Leaf_Width_Raw	Tiller_Number_Week_4	-0.22	2.93333e-09	-0.21	6.48078e-09
Leaf_Width_Raw	Tiller_Number_Week_5_Raw	-0.25	7.01772e-12	-0.26	2.78888e-13
Leaf_Width_Raw	Tiller_Number_Week_6_Raw	-0.27	3.21965e-14	-0.29	1.77636e-15
Leaf_Width_Raw	Tiller_Number_Week_7_Raw	-0.36	0	-0.38	0
Leaf_Width_Raw	Tillering_Rate	-0.2	2.16959e-08	-0.22	1.85147e-09
Leaf_Width_Raw	Weeks_Increasing_Raw	-0.23	1.93926e-10	-0.23	4.14043e-10
Lodging	Spike_Density	0.15	5.28109e-05	0.16	1.45072e-05
Lodging	Spike_Row_Type	0.27	5.30687e-13	0.27	2.6934e-13
Lodging	Tillering_Rate	0.04	0.248595	0.04	0.331911
Percent_Productive_Tillers	Lodging	-0.1	0.00997291	-0.12	0.00141592
Percent_Productive_Tillers	Plant_Height_Raw	0.02	0.56673	0	0.978948
Percent_Productive_Tillers	Seeds_Per_Spike_Raw	-0.18	1.03355e-06	-0.2	3.6847e-08
Percent_Productive_Tillers	Spike_Density	-0.13	0.000264559	-0.15	4.713e-05
Percent_Productive_Tillers	Spike_Length_Raw	0.01	0.706361	0.03	0.482861
Percent_Productive_Tillers	Spike_Row_Type	-0.15	3.45033e-05	-0.15	3.36532e-05
Percent_Productive_Tillers	Stem_Diameter_Raw	-0.12	0.000693936	-0.12	0.00144485
Percent_Productive_Tillers	Tiller_Number_Maximum_Raw	-0.36	0	-0.35	0
Percent_Productive_Tillers	Tiller_Number_Non_Productive_Raw	-0.83	0	-0.87	0
Percent_Productive_Tillers	Tiller_Number_Productive_Raw	0.39	0	0.35	0
Percent_Productive_Tillers	Tiller_Number_Week_2	-0.1	0.00552424	-0.11	0.00175916
Percent_Productive_Tillers	Tiller_Number_Week_3_Raw	-0.07	0.0509318	-0.07	0.0659992
Percent_Productive_Tillers	Tiller_Number_Week_4	-0.27	9.81437e-14	-0.28	7.10543e-15
Percent_Productive_Tillers	Tiller_Number_Week_5_Raw	-0.34	0	-0.34	0
Percent_Productive_Tillers	Tiller_Number_Week_6_Raw	-0.35	0	-0.33	0
Percent_Productive_Tillers	Tiller_Number_Week_7_Raw	-0.24	4.39819e-11	-0.21	4.74997e-09
Percent_Productive_Tillers	Tillering_Rate	-0.4	0	-0.4	0
Percent_Productive_Tillers	Weeks_Increasing_Raw	0.16	5.77885e-06	0.16	7.06152e-06
Plant_Height_Raw	Lodging	0.31	0	0.3	4.44089e-16
Plant_Height_Raw	Seeds_Per_Spike_Raw	0.08	0.0223042	0.1	0.00634573
Plant_Height_Raw	Spike_Density	-0.12	0.00148716	-0.1	0.00419918
Plant_Height_Raw	Spike_Length_Raw	0.41	0	0.41	0
Plant_Height_Raw	Spike_Row_Type	-0.08	0.0295975	-0.07	0.0461827
Plant_Height_Raw	Stem_Diameter_Raw	0.22	7.23165e-10	0.23	1.1361e-10
Plant_Height_Raw	Tiller_Number_Maximum_Raw	0.05	0.216671	0.05	0.167131
Plant_Height_Raw	Tiller_Number_Non_Productive_Raw	0	0.920611	0.03	0.410966
Plant_Height_Raw	Tiller_Number_Productive_Raw	0.06	0.0810539	0.07	0.0563002
Plant_Height_Raw	Tiller_Number_Week_2	0.05	0.204111	0.05	0.215617
Plant_Height_Raw	Tiller_Number_Week_3_Raw	0.07	0.056546	0.06	0.0889746
Plant_Height_Raw	Tiller_Number_Week_4	0.12	0.00119961	0.12	0.00125584
Plant_Height_Raw	Tiller_Number_Week_5_Raw	0.11	0.00198058	0.12	0.0013868
Plant_Height_Raw	Tiller_Number_Week_6_Raw	0.06	0.0848498	0.07	0.0443175
Plant_Height_Raw	Tiller_Number_Week_7_Raw	0.01	0.705473	0.02	0.629889
Plant_Height_Raw	Tillering_Rate	0.1	0.00498069	0.11	0.00215636
Plant_Height_Raw	Weeks_Increasing_Raw	-0.16	1.30017e-05	-0.16	1.22999e-05
Ppd_H1_Geno	Days_to_Heading_Raw	0.27	1.88738e-14	0.35	0
Ppd_H1_Geno	Fifty_Kernel_Weight_Raw	0.14	6.35785e-05	0.14	5.96127e-05
Ppd_H1_Geno	Leaf_Width_Raw	-0.02	0.639476	-0.03	0.344091
Ppd_H1_Geno	Lodging	-0.16	1.0645e-05	-0.17	3.66369e-06
Ppd_H1_Geno	Percent_Productive_Tillers	-0.04	0.317681	-0.04	0.294134
Ppd_H1_Geno	Plant_Height_Raw	0.31	0	0.31	0
Ppd_H1_Geno	Seeds_Per_Spike_Raw	-0.18	6.90107e-07	-0.16	5.07408e-06
Ppd_H1_Geno	Spike_Density	-0.34	0	-0.32	0
Ppd_H1_Geno	Spike_Length_Raw	0.53	0	0.54	0
Ppd_H1_Geno	Spike_Row_Type	-0.36	0	-0.36	0
Ppd_H1_Geno	Stem_Diameter_Raw	0	0.99667	-0.02	0.505298
Ppd_H1_Geno	Tiller_Number_Maximum_Raw	0.2	2.45579e-08	0.23	5.01539e-11
Ppd_H1_Geno	Tiller_Number_Non_Productive_Raw	0.11	0.00295573	0.15	3.8786e-05
Ppd_H1_Geno	Tiller_Number_Productive_Raw	0.23	6.11413e-11	0.23	6.66072e-11
Ppd_H1_Geno	Tiller_Number_Week_2	0.12	0.00106375	0.1	0.00805739
Ppd_H1_Geno	Tiller_Number_Week_3_Raw	0.22	1.39064e-09	0.2	4.74845e-08
Ppd_H1_Geno	Tiller_Number_Week_4	0.14	9.92124e-05	0.14	0.000104375
Ppd_H1_Geno	Tiller_Number_Week_5_Raw	0.21	7.43219e-09	0.24	1.63272e-11
Ppd_H1_Geno	Tiller_Number_Week_6_Raw	0.22	3.42752e-10	0.26	6.23501e-13
Ppd_H1_Geno	Tiller_Number_Week_7_Raw	0.24	7.25642e-12	0.27	4.08562e-14
Ppd_H1_Geno	Tillering_Rate	0.16	4.66534e-06	0.2	1.73906e-08
Ppd_H1_Geno	Weeks_Increasing_Raw	0.03	0.371918	0.04	0.273963
Seeds_Per_Spike_Raw	Lodging	0.22	2.59373e-09	0.22	2.01808e-09
Seeds_Per_Spike_Raw	Spike_Density	0.89	0	0.89	0
Seeds_Per_Spike_Raw	Spike_Length_Raw	-0.39	0	-0.4	0
Seeds_Per_Spike_Raw	Spike_Row_Type	0.82	0	0.83	0
Seeds_Per_Spike_Raw	Stem_Diameter_Raw	0.59	0	0.59	0
Seeds_Per_Spike_Raw	Tiller_Number_Maximum_Raw	-0.32	0	-0.34	0
Seeds_Per_Spike_Raw	Tiller_Number_Non_Productive_Raw	-0.04	0.225561	-0.02	0.586735
Seeds_Per_Spike_Raw	Tiller_Number_Productive_Raw	-0.47	0	-0.49	0
Seeds_Per_Spike_Raw	Tiller_Number_Week_2	-0.27	1.35447e-14	-0.25	5.78626e-12
Seeds_Per_Spike_Raw	Tiller_Number_Week_3_Raw	-0.45	0	-0.43	0
Seeds_Per_Spike_Raw	Tiller_Number_Week_4	-0.24	3.43301e-11	-0.2	2.5234e-08
Seeds_Per_Spike_Raw	Tiller_Number_Week_5_Raw	-0.29	6.66134e-16	-0.29	8.88178e-16
Seeds_Per_Spike_Raw	Tiller_Number_Week_6_Raw	-0.31	0	-0.31	0
Seeds_Per_Spike_Raw	Tiller_Number_Week_7_Raw	-0.41	0	-0.43	0
Seeds_Per_Spike_Raw	Tillering_Rate	-0.22	9.1443e-10	-0.22	1.40097e-09
Seeds_Per_Spike_Raw	Weeks_Increasing_Raw	-0.25	1.75571e-12	-0.27	2.33147e-14
Spike_Density	Tillering_Rate	-0.29	8.88178e-16	-0.29	2.22045e-16
Spike_Length_Raw	Lodging	-0.04	0.296904	-0.07	0.068279
Spike_Length_Raw	Spike_Density	-0.71	0	-0.71	0
Spike_Length_Raw	Spike_Row_Type	-0.62	0	-0.64	0
Spike_Length_Raw	Stem_Diameter_Raw	-0.14	8.37808e-05	-0.17	3.05776e-06
Spike_Length_Raw	Tiller_Number_Maximum_Raw	0.33	0	0.37	0
Spike_Length_Raw	Tiller_Number_Non_Productive_Raw	0.14	7.88009e-05	0.17	3.17182e-06
Spike_Length_Raw	Tiller_Number_Productive_Raw	0.38	0	0.41	0
Spike_Length_Raw	Tiller_Number_Week_2	0.3	0	0.28	1.77636e-15
Spike_Length_Raw	Tiller_Number_Week_3_Raw	0.43	0	0.44	0
Spike_Length_Raw	Tiller_Number_Week_4	0.3	0	0.31	0
Spike_Length_Raw	Tiller_Number_Week_5_Raw	0.35	0	0.39	0
Spike_Length_Raw	Tiller_Number_Week_6_Raw	0.35	0	0.38	0
Spike_Length_Raw	Tiller_Number_Week_7_Raw	0.37	0	0.4	0
Spike_Length_Raw	Tillering_Rate	0.31	0	0.34	0
Spike_Length_Raw	Weeks_Increasing_Raw	0.03	0.381271	0.05	0.209492
Spike_Row_Type	Spike_Density	0.84	0	0.83	0
Spike_Row_Type	Tillering_Rate	-0.28	6.88338e-15	-0.32	0
Stem_Diameter_Raw	Lodging	0.12	0.00164544	0.13	0.000685691
Stem_Diameter_Raw	Spike_Density	0.51	0	0.5	0
Stem_Diameter_Raw	Spike_Row_Type	0.47	0	0.49	0
Stem_Diameter_Raw	Tiller_Number_Maximum_Raw	-0.3	0	-0.32	0
Stem_Diameter_Raw	Tiller_Number_Non_Productive_Raw	-0.07	0.0476746	-0.07	0.0537629
Stem_Diameter_Raw	Tiller_Number_Productive_Raw	-0.38	0	-0.4	0
Stem_Diameter_Raw	Tiller_Number_Week_2	-0.21	2.94491e-09	-0.19	5.62167e-08
Stem_Diameter_Raw	Tiller_Number_Week_3_Raw	-0.33	0	-0.34	0
Stem_Diameter_Raw	Tiller_Number_Week_4	-0.27	1.44329e-14	-0.25	3.91776e-12
Stem_Diameter_Raw	Tiller_Number_Week_5_Raw	-0.28	6.88338e-15	-0.28	1.55431e-15
Stem_Diameter_Raw	Tiller_Number_Week_6_Raw	-0.28	4.44089e-15	-0.29	4.44089e-16
Stem_Diameter_Raw	Tiller_Number_Week_7_Raw	-0.33	0	-0.36	0
Stem_Diameter_Raw	Tillering_Rate	-0.25	1.08757e-12	-0.26	3.40172e-13
Stem_Diameter_Raw	Weeks_Increasing_Raw	-0.14	0.00011567	-0.13	0.000297403
Tiller_Number_Maximum_Raw	Lodging	0	0.94477	-0.01	0.71058
Tiller_Number_Maximum_Raw	Spike_Density	-0.37	0	-0.39	0
Tiller_Number_Maximum_Raw	Spike_Row_Type	-0.36	0	-0.41	0
Tiller_Number_Maximum_Raw	Tiller_Number_Non_Productive_Raw	0.77	0	0.73	0
Tiller_Number_Maximum_Raw	Tiller_Number_Productive_Raw	0.68	0	0.7	0
Tiller_Number_Maximum_Raw	Tiller_Number_Week_2	0.46	0	0.47	0
Tiller_Number_Maximum_Raw	Tiller_Number_Week_3_Raw	0.59	0	0.61	0
Tiller_Number_Maximum_Raw	Tiller_Number_Week_4	0.76	0	0.77	0
Tiller_Number_Maximum_Raw	Tiller_Number_Week_5_Raw	0.94	0	0.95	0
Tiller_Number_Maximum_Raw	Tiller_Number_Week_6_Raw	0.98	0	0.98	0
Tiller_Number_Maximum_Raw	Tiller_Number_Week_7_Raw	0.94	0	0.94	0
Tiller_Number_Maximum_Raw	Tillering_Rate	0.92	0	0.92	0
Tiller_Number_Maximum_Raw	Weeks_Increasing_Raw	0.1	0.00359438	0.1	0.00467291
Tiller_Number_Non_Productive_Raw	Lodging	0.07	0.0648935	0.08	0.0358322
Tiller_Number_Non_Productive_Raw	Spike_Density	-0.09	0.0123971	-0.09	0.0176662
Tiller_Number_Non_Productive_Raw	Spike_Row_Type	-0.07	0.0471782	-0.1	0.00694932
Tiller_Number_Non_Productive_Raw	Tiller_Number_Productive_Raw	0.05	0.178209	0.1	0.00881577
Tiller_Number_Non_Productive_Raw	Tiller_Number_Week_2	0.29	0	0.32	0
Tiller_Number_Non_Productive_Raw	Tiller_Number_Week_3_Raw	0.34	0	0.35	0
Tiller_Number_Non_Productive_Raw	Tiller_Number_Week_4	0.55	0	0.58	0
Tiller_Number_Non_Productive_Raw	Tiller_Number_Week_5_Raw	0.71	0	0.71	0
Tiller_Number_Non_Productive_Raw	Tiller_Number_Week_6_Raw	0.75	0	0.71	0
Tiller_Number_Non_Productive_Raw	Tiller_Number_Week_7_Raw	0.65	0	0.6	0
Tiller_Number_Non_Productive_Raw	Tillering_Rate	0.75	0	0.73	0
Tiller_Number_Non_Productive_Raw	Weeks_Increasing_Raw	-0.04	0.284033	-0.07	0.0629078
Tiller_Number_Productive_Raw	Lodging	-0.08	0.0268056	-0.09	0.0155699
Tiller_Number_Productive_Raw	Spike_Density	-0.5	0	-0.51	0
Tiller_Number_Productive_Raw	Spike_Row_Type	-0.52	0	-0.55	0
Tiller_Number_Productive_Raw	Tiller_Number_Week_2	0.41	0	0.4	0
Tiller_Number_Productive_Raw	Tiller_Number_Week_3_Raw	0.56	0	0.57	0
Tiller_Number_Productive_Raw	Tiller_Number_Week_4	0.55	0	0.55	0
Tiller_Number_Productive_Raw	Tiller_Number_Week_5_Raw	0.65	0	0.67	0
Tiller_Number_Productive_Raw	Tiller_Number_Week_6_Raw	0.66	0	0.69	0
Tiller_Number_Productive_Raw	Tiller_Number_Week_7_Raw	0.72	0	0.75	0
Tiller_Number_Productive_Raw	Tillering_Rate	0.57	0	0.59	0
Tiller_Number_Productive_Raw	Weeks_Increasing_Raw	0.2	1.30624e-08	0.2	1.65336e-08
Tiller_Number_Week_2	Lodging	0.01	0.752828	0	0.980831
Tiller_Number_Week_2	Spike_Density	-0.32	0	-0.29	0
Tiller_Number_Week_2	Spike_Row_Type	-0.34	0	-0.33	0
Tiller_Number_Week_2	Tiller_Number_Week_3_Raw	0.81	0	0.79	0
Tiller_Number_Week_2	Tiller_Number_Week_4	0.7	0	0.69	0
Tiller_Number_Week_2	Tiller_Number_Week_5_Raw	0.5	0	0.51	0
Tiller_Number_Week_2	Tiller_Number_Week_6_Raw	0.45	0	0.46	0
Tiller_Number_Week_2	Tiller_Number_Week_7_Raw	0.43	0	0.42	0
Tiller_Number_Week_2	Tillering_Rate	0.47	0	0.49	0
Tiller_Number_Week_2	Weeks_Increasing_Raw	-0.07	0.0492863	-0.09	0.0176093
Tiller_Number_Week_3_Raw	Lodging	-0.11	0.00218919	-0.12	0.00179436
Tiller_Number_Week_3_Raw	Spike_Density	-0.5	0	-0.47	0
Tiller_Number_Week_3_Raw	Spike_Row_Type	-0.56	0	-0.58	0
Tiller_Number_Week_3_Raw	Tiller_Number_Week_4	0.8	0	0.8	0
Tiller_Number_Week_3_Raw	Tiller_Number_Week_5_Raw	0.64	0	0.65	0
Tiller_Number_Week_3_Raw	Tiller_Number_Week_6_Raw	0.59	0	0.61	0
Tiller_Number_Week_3_Raw	Tiller_Number_Week_7_Raw	0.58	0	0.59	0
Tiller_Number_Week_3_Raw	Tillering_Rate	0.59	0	0.61	0
Tiller_Number_Week_3_Raw	Weeks_Increasing_Raw	-0.04	0.220356	-0.05	0.183623
Tiller_Number_Week_4	Lodging	0.02	0.685749	0.01	0.867312
Tiller_Number_Week_4	Spike_Density	-0.3	0	-0.26	2.8777e-13
Tiller_Number_Week_4	Spike_Row_Type	-0.32	0	-0.33	0
Tiller_Number_Week_4	Tiller_Number_Week_5_Raw	0.84	0	0.84	0
Tiller_Number_Week_4	Tiller_Number_Week_6_Raw	0.76	0	0.77	0
Tiller_Number_Week_4	Tiller_Number_Week_7_Raw	0.67	0	0.67	0
Tiller_Number_Week_4	Tillering_Rate	0.8	0	0.8	0
Tiller_Number_Week_4	Weeks_Increasing_Raw	-0.15	3.1401e-05	-0.16	1.48709e-05
Tiller_Number_Week_5_Raw	Lodging	0	0.905507	0	0.910207
Tiller_Number_Week_5_Raw	Spike_Density	-0.35	0	-0.36	0
Tiller_Number_Week_5_Raw	Spike_Row_Type	-0.35	0	-0.4	0
Tiller_Number_Week_5_Raw	Tiller_Number_Week_6_Raw	0.94	0	0.95	0
Tiller_Number_Week_5_Raw	Tiller_Number_Week_7_Raw	0.86	0	0.86	0
Tiller_Number_Week_5_Raw	Tillering_Rate	0.95	0	0.95	0
Tiller_Number_Week_5_Raw	Weeks_Increasing_Raw	-0.08	0.0314192	-0.08	0.0247191
Tiller_Number_Week_6_Raw	Lodging	0	0.901766	0	0.919571
Tiller_Number_Week_6_Raw	Spike_Density	-0.36	0	-0.38	0
Tiller_Number_Week_6_Raw	Spike_Row_Type	-0.35	0	-0.4	0
Tiller_Number_Week_6_Raw	Tiller_Number_Week_7_Raw	0.91	0	0.91	0
Tiller_Number_Week_6_Raw	Tillering_Rate	0.91	0	0.91	0
Tiller_Number_Week_6_Raw	Weeks_Increasing_Raw	0.07	0.041734	0.08	0.0351275
Tiller_Number_Week_7_Raw	Lodging	-0.07	0.0512826	-0.08	0.0235702
Tiller_Number_Week_7_Raw	Spike_Density	-0.45	0	-0.48	0
Tiller_Number_Week_7_Raw	Spike_Row_Type	-0.44	0	-0.49	0
Tiller_Number_Week_7_Raw	Tillering_Rate	0.8	0	0.79	0
Tiller_Number_Week_7_Raw	Weeks_Increasing_Raw	0.27	2.73115e-14	0.27	2.08722e-14
Weeks_Increasing_Raw	Lodging	-0.14	0.000235614	-0.13	0.00055094
Weeks_Increasing_Raw	Spike_Density	-0.2	3.40356e-08	-0.22	5.53398e-10
Weeks_Increasing_Raw	Spike_Row_Type	-0.19	5.17945e-08	-0.19	8.6922e-08
Weeks_Increasing_Raw	Tillering_Rate	-0.27	3.35287e-14	-0.27	3.68594e-14

## Sheet: 2015_2-Row
Trait 1	Trait 2	Pearson Correlation	Pearson p-value	Spearman Correlation	Spearman p-value
Days_to_Heading_Raw	Fifty_Kernel_Weight_Raw	-0.21	5.66613e-05	-0.29	1.23903e-08
Days_to_Heading_Raw	Leaf_Width_Raw	0.29	1.73001e-08	0.24	3.4681e-06
Days_to_Heading_Raw	Lodging	0.04	0.504463	0.01	0.835162
Days_to_Heading_Raw	Percent_Productive_Tillers	-0.45	0	-0.43	0
Days_to_Heading_Raw	Plant_Height_Raw	0.3	5.4605e-09	0.26	5.27995e-07
Days_to_Heading_Raw	Seeds_Per_Spike_Raw	0.26	4.25371e-07	0.39	8.43769e-15
Days_to_Heading_Raw	Spike_Density	-0.05	0.29137	0.05	0.378323
Days_to_Heading_Raw	Spike_Length_Raw	0.34	1.5004e-11	0.38	1.62093e-14
Days_to_Heading_Raw	Stem_Diameter_Raw	0.06	0.207274	0.1	0.0555653
Days_to_Heading_Raw	Tiller_Number_Maximum_Raw	0.41	0	0.41	0
Days_to_Heading_Raw	Tiller_Number_Non_Productive_Raw	0.47	0	0.5	0
Days_to_Heading_Raw	Tiller_Number_Productive_Raw	0.02	0.653786	0.06	0.276175
Days_to_Heading_Raw	Tiller_Number_Week_2	0.05	0.319102	0.06	0.232753
Days_to_Heading_Raw	Tiller_Number_Week_3_Raw	0.2	8.85841e-05	0.22	1.47208e-05
Days_to_Heading_Raw	Tiller_Number_Week_4	0.38	2.70894e-14	0.38	3.4861e-14
Days_to_Heading_Raw	Tiller_Number_Week_5_Raw	0.51	0	0.52	0
Days_to_Heading_Raw	Tiller_Number_Week_6_Raw	0.47	0	0.47	0
Days_to_Heading_Raw	Tiller_Number_Week_7_Raw	0.33	7.15348e-11	0.33	5.60503e-11
Days_to_Heading_Raw	Tillering_Rate	0.48	0	0.48	0
Days_to_Heading_Raw	Weeks_Increasing_Raw	-0.26	1.8695e-07	-0.28	2.24988e-08
Fifty_Kernel_Weight_Raw	Leaf_Width_Raw	0.06	0.248177	0.09	0.0826572
Fifty_Kernel_Weight_Raw	Lodging	0.1	0.0696506	0.07	0.161863
Fifty_Kernel_Weight_Raw	Percent_Productive_Tillers	0.19	0.000162325	0.23	6.23724e-06
Fifty_Kernel_Weight_Raw	Plant_Height_Raw	-0.02	0.721171	-0.04	0.441207
Fifty_Kernel_Weight_Raw	Seeds_Per_Spike_Raw	-0.21	3.06961e-05	-0.21	3.88579e-05
Fifty_Kernel_Weight_Raw	Spike_Density	-0.26	5.03064e-07	-0.18	0.000616762
Fifty_Kernel_Weight_Raw	Spike_Length_Raw	0.03	0.523745	-0.02	0.727433
Fifty_Kernel_Weight_Raw	Stem_Diameter_Raw	0.11	0.0269995	0.13	0.0101634
Fifty_Kernel_Weight_Raw	Tiller_Number_Maximum_Raw	-0.16	0.00128815	-0.21	4.20435e-05
Fifty_Kernel_Weight_Raw	Tiller_Number_Non_Productive_Raw	-0.2	0.000107543	-0.26	3.01311e-07
Fifty_Kernel_Weight_Raw	Tiller_Number_Productive_Raw	-0.01	0.821091	-0.01	0.857476
Fifty_Kernel_Weight_Raw	Tiller_Number_Week_2	-0.11	0.0353902	-0.13	0.0133144
Fifty_Kernel_Weight_Raw	Tiller_Number_Week_3_Raw	-0.19	0.000146244	-0.22	1.21644e-05
Fifty_Kernel_Weight_Raw	Tiller_Number_Week_4	-0.2	6.48466e-05	-0.25	5.46339e-07
Fifty_Kernel_Weight_Raw	Tiller_Number_Week_5_Raw	-0.2	0.00011304	-0.25	1.25547e-06
Fifty_Kernel_Weight_Raw	Tiller_Number_Week_6_Raw	-0.17	0.000817596	-0.22	1.64451e-05
Fifty_Kernel_Weight_Raw	Tiller_Number_Week_7_Raw	-0.12	0.019691	-0.15	0.00451212
Fifty_Kernel_Weight_Raw	Tillering_Rate	-0.21	2.80901e-05	-0.27	8.40055e-08
Fifty_Kernel_Weight_Raw	Weeks_Increasing_Raw	0.15	0.002545	0.19	0.000193403
Leaf_Width_Raw	Lodging	0.06	0.228048	0.04	0.406092
Leaf_Width_Raw	Percent_Productive_Tillers	0.05	0.359718	0.04	0.473093
Leaf_Width_Raw	Plant_Height_Raw	0.31	7.95141e-10	0.31	5.76782e-10
Leaf_Width_Raw	Seeds_Per_Spike_Raw	0.22	1.31199e-05	0.22	1.25862e-05
Leaf_Width_Raw	Spike_Density	0.13	0.0102605	0.13	0.00950306
Leaf_Width_Raw	Spike_Length_Raw	0.11	0.0361888	0.13	0.0152361
Leaf_Width_Raw	Stem_Diameter_Raw	0.37	1.28564e-13	0.35	2.05658e-12
Leaf_Width_Raw	Tiller_Number_Maximum_Raw	-0.17	0.00125604	-0.17	0.000791572
Leaf_Width_Raw	Tiller_Number_Non_Productive_Raw	-0.11	0.0375136	-0.09	0.0818738
Leaf_Width_Raw	Tiller_Number_Productive_Raw	-0.12	0.0182837	-0.13	0.0153904
Leaf_Width_Raw	Tiller_Number_Week_2	-0.02	0.718473	0	0.989788
Leaf_Width_Raw	Tiller_Number_Week_3_Raw	-0.05	0.348929	-0.04	0.413828
Leaf_Width_Raw	Tiller_Number_Week_4	-0.06	0.234306	-0.03	0.519691
Leaf_Width_Raw	Tiller_Number_Week_5_Raw	-0.09	0.0741163	-0.09	0.0696722
Leaf_Width_Raw	Tiller_Number_Week_6_Raw	-0.12	0.0171821	-0.13	0.0144639
Leaf_Width_Raw	Tiller_Number_Week_7_Raw	-0.17	0.000851867	-0.18	0.000438823
Leaf_Width_Raw	Tillering_Rate	-0.12	0.0250209	-0.12	0.0209743
Leaf_Width_Raw	Weeks_Increasing_Raw	-0.07	0.180902	-0.08	0.14072
Lodging	Spike_Density	-0.09	0.0859629	-0.13	0.0171098
Lodging	Tillering_Rate	0.05	0.327796	0.06	0.281557
Percent_Productive_Tillers	Lodging	-0.07	0.206349	-0.09	0.0765255
Percent_Productive_Tillers	Plant_Height_Raw	0	0.978356	-0.02	0.69727
Percent_Productive_Tillers	Seeds_Per_Spike_Raw	-0.18	0.00037476	-0.19	0.000153461
Percent_Productive_Tillers	Spike_Density	-0.05	0.378264	-0.07	0.168206
Percent_Productive_Tillers	Spike_Length_Raw	-0.15	0.00397289	-0.13	0.00961912
Percent_Productive_Tillers	Stem_Diameter_Raw	-0.08	0.12073	-0.07	0.192216
Percent_Productive_Tillers	Tiller_Number_Maximum_Raw	-0.43	0	-0.4	8.88178e-16
Percent_Productive_Tillers	Tiller_Number_Non_Productive_Raw	-0.88	0	-0.92	0
Percent_Productive_Tillers	Tiller_Number_Productive_Raw	0.42	0	0.39	6.43929e-15
Percent_Productive_Tillers	Tiller_Number_Week_2	-0.17	0.00088084	-0.17	0.00128117
Percent_Productive_Tillers	Tiller_Number_Week_3_Raw	-0.23	7.0215e-06	-0.21	6.03705e-05
Percent_Productive_Tillers	Tiller_Number_Week_4	-0.33	8.56211e-11	-0.32	3.75433e-10
Percent_Productive_Tillers	Tiller_Number_Week_5_Raw	-0.41	0	-0.39	2.66454e-15
Percent_Productive_Tillers	Tiller_Number_Week_6_Raw	-0.43	0	-0.39	2.66454e-15
Percent_Productive_Tillers	Tiller_Number_Week_7_Raw	-0.37	2.61124e-13	-0.31	1.0176e-09
Percent_Productive_Tillers	Tillering_Rate	-0.43	0	-0.41	0
Percent_Productive_Tillers	Weeks_Increasing_Raw	0.11	0.0264502	0.12	0.0209997
Plant_Height_Raw	Lodging	0.42	0	0.42	2.22045e-16
Plant_Height_Raw	Seeds_Per_Spike_Raw	0.36	1.19105e-12	0.34	3.40228e-11
Plant_Height_Raw	Spike_Density	-0.06	0.219186	-0.05	0.345076
Plant_Height_Raw	Spike_Length_Raw	0.45	0	0.44	0
Plant_Height_Raw	Stem_Diameter_Raw	0.43	0	0.45	0
Plant_Height_Raw	Tiller_Number_Maximum_Raw	-0.01	0.773607	-0.02	0.754612
Plant_Height_Raw	Tiller_Number_Non_Productive_Raw	-0.03	0.607371	0.01	0.841945
Plant_Height_Raw	Tiller_Number_Productive_Raw	0.01	0.878035	0	0.988655
Plant_Height_Raw	Tiller_Number_Week_2	0.06	0.288017	0.06	0.253405
Plant_Height_Raw	Tiller_Number_Week_3_Raw	0.04	0.488258	0.04	0.409566
Plant_Height_Raw	Tiller_Number_Week_4	0.09	0.0791681	0.09	0.0683134
Plant_Height_Raw	Tiller_Number_Week_5_Raw	0.07	0.166423	0.07	0.168114
Plant_Height_Raw	Tiller_Number_Week_6_Raw	0.02	0.73081	0.03	0.511828
Plant_Height_Raw	Tiller_Number_Week_7_Raw	-0.04	0.465495	-0.04	0.410838
Plant_Height_Raw	Tillering_Rate	0.04	0.393706	0.05	0.331654
Plant_Height_Raw	Weeks_Increasing_Raw	-0.16	0.00253057	-0.16	0.00248537
Ppd_H1_Geno	Days_to_Heading_Raw	0.4	4.44089e-16	0.49	0
Ppd_H1_Geno	Fifty_Kernel_Weight_Raw	-0.07	0.201674	-0.07	0.184177
Ppd_H1_Geno	Leaf_Width_Raw	0.13	0.0128853	0.13	0.0108443
Ppd_H1_Geno	Lodging	-0.04	0.511848	-0.05	0.371938
Ppd_H1_Geno	Percent_Productive_Tillers	-0.2	8.26696e-05	-0.2	0.000139578
Ppd_H1_Geno	Plant_Height_Raw	0.33	1.31222e-10	0.32	5.26148e-10
Ppd_H1_Geno	Seeds_Per_Spike_Raw	0.38	2.15383e-14	0.39	1.77636e-15
Ppd_H1_Geno	Spike_Density	-0.08	0.114484	0.01	0.801053
Ppd_H1_Geno	Spike_Length_Raw	0.5	0	0.5	0
Ppd_H1_Geno	Stem_Diameter_Raw	0.11	0.0328085	0.14	0.00797482
Ppd_H1_Geno	Tiller_Number_Maximum_Raw	0.24	2.86563e-06	0.26	1.7273e-07
Ppd_H1_Geno	Tiller_Number_Non_Productive_Raw	0.23	5.93953e-06	0.27	1.90604e-07
Ppd_H1_Geno	Tiller_Number_Productive_Raw	0.13	0.0110066	0.12	0.0183097
Ppd_H1_Geno	Tiller_Number_Week_2	0.05	0.314248	0.03	0.537423
Ppd_H1_Geno	Tiller_Number_Week_3_Raw	0.11	0.0370519	0.09	0.0829148
Ppd_H1_Geno	Tiller_Number_Week_4	0.18	0.000335974	0.19	0.000262088
Ppd_H1_Geno	Tiller_Number_Week_5_Raw	0.27	1.37439e-07	0.29	6.61364e-09
Ppd_H1_Geno	Tiller_Number_Week_6_Raw	0.28	2.63158e-08	0.3	1.34682e-09
Ppd_H1_Geno	Tiller_Number_Week_7_Raw	0.22	1.94461e-05	0.24	2.19515e-06
Ppd_H1_Geno	Tillering_Rate	0.25	1.30522e-06	0.27	1.47102e-07
Ppd_H1_Geno	Weeks_Increasing_Raw	-0.08	0.114309	-0.08	0.104841
Seeds_Per_Spike_Raw	Lodging	0.04	0.401545	-0.02	0.776311
Seeds_Per_Spike_Raw	Spike_Density	0.57	0	0.56	0
Seeds_Per_Spike_Raw	Spike_Length_Raw	0.47	0	0.5	0
Seeds_Per_Spike_Raw	Stem_Diameter_Raw	0.33	3.48572e-11	0.31	1.29303e-09
Seeds_Per_Spike_Raw	Tiller_Number_Maximum_Raw	0.14	0.00631448	0.17	0.000800736
Seeds_Per_Spike_Raw	Tiller_Number_Non_Productive_Raw	0.18	0.000495925	0.22	1.18591e-05
Seeds_Per_Spike_Raw	Tiller_Number_Productive_Raw	0.04	0.494483	0.06	0.268721
Seeds_Per_Spike_Raw	Tiller_Number_Week_2	0.13	0.0144164	0.13	0.0144155
Seeds_Per_Spike_Raw	Tiller_Number_Week_3_Raw	0.24	2.8496e-06	0.26	2.6342e-07
Seeds_Per_Spike_Raw	Tiller_Number_Week_4	0.26	2.63929e-07	0.31	9.86632e-10
Seeds_Per_Spike_Raw	Tiller_Number_Week_5_Raw	0.25	5.09507e-07	0.29	1.08041e-08
Seeds_Per_Spike_Raw	Tiller_Number_Week_6_Raw	0.19	0.000185644	0.22	1.77192e-05
Seeds_Per_Spike_Raw	Tiller_Number_Week_7_Raw	0.09	0.0754087	0.12	0.0182648
Seeds_Per_Spike_Raw	Tillering_Rate	0.22	1.16359e-05	0.26	2.23209e-07
Seeds_Per_Spike_Raw	Weeks_Increasing_Raw	-0.23	5.18081e-06	-0.25	1.28713e-06
Spike_Density	Tillering_Rate	0.04	0.45266	0.09	0.0918237
Spike_Length_Raw	Lodging	0.14	0.00856016	0.11	0.0448029
Spike_Length_Raw	Spike_Density	-0.44	0	-0.35	1.24789e-12
Spike_Length_Raw	Stem_Diameter_Raw	0.23	3.81563e-06	0.28	3.32108e-08
Spike_Length_Raw	Tiller_Number_Maximum_Raw	0.15	0.00440464	0.16	0.00235351
Spike_Length_Raw	Tiller_Number_Non_Productive_Raw	0.16	0.00242854	0.16	0.00161798
Spike_Length_Raw	Tiller_Number_Productive_Raw	0.04	0.398963	0.05	0.382444
Spike_Length_Raw	Tiller_Number_Week_2	0.1	0.0594896	0.07	0.206
Spike_Length_Raw	Tiller_Number_Week_3_Raw	0.13	0.011915	0.1	0.0437031
Spike_Length_Raw	Tiller_Number_Week_4	0.15	0.00366533	0.15	0.00257561
Spike_Length_Raw	Tiller_Number_Week_5_Raw	0.21	4.97853e-05	0.22	1.64894e-05
Spike_Length_Raw	Tiller_Number_Week_6_Raw	0.18	0.00049985	0.19	0.00018519
Spike_Length_Raw	Tiller_Number_Week_7_Raw	0.12	0.0156221	0.13	0.0111675
Spike_Length_Raw	Tillering_Rate	0.19	0.000134856	0.2	7.84378e-05
Spike_Length_Raw	Weeks_Increasing_Raw	-0.16	0.0014024	-0.16	0.00237588
Stem_Diameter_Raw	Lodging	0.16	0.00314248	0.15	0.00577281
Stem_Diameter_Raw	Spike_Density	0.16	0.00185094	0.11	0.0387539
Stem_Diameter_Raw	Tiller_Number_Maximum_Raw	-0.09	0.0662713	-0.09	0.0900656
Stem_Diameter_Raw	Tiller_Number_Non_Productive_Raw	0.03	0.627314	0.02	0.738566
Stem_Diameter_Raw	Tiller_Number_Productive_Raw	-0.15	0.00409633	-0.13	0.0117457
Stem_Diameter_Raw	Tiller_Number_Week_2	0.01	0.851144	0.04	0.482208
Stem_Diameter_Raw	Tiller_Number_Week_3_Raw	-0.03	0.558984	-0.02	0.749394
Stem_Diameter_Raw	Tiller_Number_Week_4	-0.06	0.224558	-0.01	0.786639
Stem_Diameter_Raw	Tiller_Number_Week_5_Raw	-0.05	0.325223	-0.03	0.541332
Stem_Diameter_Raw	Tiller_Number_Week_6_Raw	-0.07	0.148677	-0.06	0.230964
Stem_Diameter_Raw	Tiller_Number_Week_7_Raw	-0.11	0.0383176	-0.11	0.0305343
Stem_Diameter_Raw	Tillering_Rate	-0.07	0.18627	-0.05	0.349769
Stem_Diameter_Raw	Weeks_Increasing_Raw	-0.06	0.261961	-0.06	0.2557
Tiller_Number_Maximum_Raw	Lodging	0.02	0.655617	0.02	0.668623
Tiller_Number_Maximum_Raw	Spike_Density	0	0.985928	0.05	0.378171
Tiller_Number_Maximum_Raw	Tiller_Number_Non_Productive_Raw	0.75	0	0.7	0
Tiller_Number_Maximum_Raw	Tiller_Number_Productive_Raw	0.6	0	0.63	0
Tiller_Number_Maximum_Raw	Tiller_Number_Week_2	0.4	1.11022e-15	0.36	5.82645e-13
Tiller_Number_Maximum_Raw	Tiller_Number_Week_3_Raw	0.58	0	0.55	0
Tiller_Number_Maximum_Raw	Tiller_Number_Week_4	0.73	0	0.74	0
Tiller_Number_Maximum_Raw	Tiller_Number_Week_5_Raw	0.92	0	0.93	0
Tiller_Number_Maximum_Raw	Tiller_Number_Week_6_Raw	0.97	0	0.97	0
Tiller_Number_Maximum_Raw	Tiller_Number_Week_7_Raw	0.96	0	0.95	0
Tiller_Number_Maximum_Raw	Tillering_Rate	0.89	0	0.89	0
Tiller_Number_Maximum_Raw	Weeks_Increasing_Raw	0	0.94612	-0.01	0.790612
Tiller_Number_Non_Productive_Raw	Lodging	0.04	0.41215	0.07	0.161498
Tiller_Number_Non_Productive_Raw	Spike_Density	0.03	0.530093	0.08	0.125919
Tiller_Number_Non_Productive_Raw	Tiller_Number_Productive_Raw	-0.07	0.170847	-0.03	0.530244
Tiller_Number_Non_Productive_Raw	Tiller_Number_Week_2	0.28	2.20006e-08	0.27	7.99686e-08
Tiller_Number_Non_Productive_Raw	Tiller_Number_Week_3_Raw	0.41	2.22045e-16	0.39	9.76996e-15
Tiller_Number_Non_Productive_Raw	Tiller_Number_Week_4	0.52	0	0.54	0
Tiller_Number_Non_Productive_Raw	Tiller_Number_Week_5_Raw	0.69	0	0.68	0
Tiller_Number_Non_Productive_Raw	Tiller_Number_Week_6_Raw	0.73	0	0.69	0
Tiller_Number_Non_Productive_Raw	Tiller_Number_Week_7_Raw	0.7	0	0.61	0
Tiller_Number_Non_Productive_Raw	Tillering_Rate	0.7	0	0.68	0
Tiller_Number_Non_Productive_Raw	Weeks_Increasing_Raw	-0.06	0.278957	-0.1	0.0437563
Tiller_Number_Productive_Raw	Lodging	-0.01	0.798996	-0.04	0.421746
Tiller_Number_Productive_Raw	Spike_Density	-0.01	0.801291	0.03	0.514315
Tiller_Number_Productive_Raw	Tiller_Number_Week_2	0.26	2.03846e-07	0.24	3.24942e-06
Tiller_Number_Productive_Raw	Tiller_Number_Week_3_Raw	0.38	1.9762e-14	0.4	1.55431e-15
Tiller_Number_Productive_Raw	Tiller_Number_Week_4	0.46	0	0.46	0
Tiller_Number_Productive_Raw	Tiller_Number_Week_5_Raw	0.56	0	0.58	0
Tiller_Number_Productive_Raw	Tiller_Number_Week_6_Raw	0.57	0	0.61	0
Tiller_Number_Productive_Raw	Tiller_Number_Week_7_Raw	0.61	0	0.65	0
Tiller_Number_Productive_Raw	Tillering_Rate	0.51	0	0.52	0
Tiller_Number_Productive_Raw	Weeks_Increasing_Raw	0.08	0.119951	0.07	0.181136
Tiller_Number_Week_2	Lodging	0.14	0.00954949	0.14	0.00851539
Tiller_Number_Week_2	Spike_Density	0.03	0.519763	0.05	0.340971
Tiller_Number_Week_2	Tiller_Number_Week_3_Raw	0.79	0	0.77	0
Tiller_Number_Week_2	Tiller_Number_Week_4	0.64	0	0.62	0
Tiller_Number_Week_2	Tiller_Number_Week_5_Raw	0.43	0	0.4	4.44089e-16
Tiller_Number_Week_2	Tiller_Number_Week_6_Raw	0.41	0	0.37	5.4623e-14
Tiller_Number_Week_2	Tiller_Number_Week_7_Raw	0.36	7.44738e-13	0.31	4.30121e-10
Tiller_Number_Week_2	Tillering_Rate	0.41	0	0.4	1.33227e-15
Tiller_Number_Week_2	Weeks_Increasing_Raw	-0.14	0.00543051	-0.15	0.00271476
Tiller_Number_Week_3_Raw	Lodging	0.02	0.693467	0.03	0.585503
Tiller_Number_Week_3_Raw	Spike_Density	0.12	0.0235262	0.15	0.00327538
Tiller_Number_Week_3_Raw	Tiller_Number_Week_4	0.83	0	0.83	0
Tiller_Number_Week_3_Raw	Tiller_Number_Week_5_Raw	0.63	0	0.61	0
Tiller_Number_Week_3_Raw	Tiller_Number_Week_6_Raw	0.59	0	0.57	0
Tiller_Number_Week_3_Raw	Tiller_Number_Week_7_Raw	0.52	0	0.49	0
Tiller_Number_Week_3_Raw	Tillering_Rate	0.6	0	0.59	0
Tiller_Number_Week_3_Raw	Weeks_Increasing_Raw	-0.2	0.000132062	-0.2	6.10731e-05
Tiller_Number_Week_4	Lodging	0.07	0.205232	0.06	0.268591
Tiller_Number_Week_4	Spike_Density	0.12	0.0211039	0.17	0.000642053
Tiller_Number_Week_4	Tiller_Number_Week_5_Raw	0.81	0	0.81	0
Tiller_Number_Week_4	Tiller_Number_Week_6_Raw	0.74	0	0.75	0
Tiller_Number_Week_4	Tiller_Number_Week_7_Raw	0.65	0	0.65	0
Tiller_Number_Week_4	Tillering_Rate	0.77	0	0.77	0
Tiller_Number_Week_4	Weeks_Increasing_Raw	-0.25	1.05701e-06	-0.25	1.35668e-06
Tiller_Number_Week_5_Raw	Lodging	0.03	0.54413	0.05	0.393594
Tiller_Number_Week_5_Raw	Spike_Density	0.05	0.289494	0.1	0.0444744
Tiller_Number_Week_5_Raw	Tiller_Number_Week_6_Raw	0.94	0	0.93	0
Tiller_Number_Week_5_Raw	Tiller_Number_Week_7_Raw	0.85	0	0.85	0
Tiller_Number_Week_5_Raw	Tillering_Rate	0.92	0	0.92	0
Tiller_Number_Week_5_Raw	Weeks_Increasing_Raw	-0.2	7.29399e-05	-0.21	3.92651e-05
Tiller_Number_Week_6_Raw	Lodging	0.02	0.657126	0.03	0.589394
Tiller_Number_Week_6_Raw	Spike_Density	0.02	0.671534	0.06	0.241822
Tiller_Number_Week_6_Raw	Tiller_Number_Week_7_Raw	0.91	0	0.9	0
Tiller_Number_Week_6_Raw	Tillering_Rate	0.89	0	0.88	0
Tiller_Number_Week_6_Raw	Weeks_Increasing_Raw	-0.07	0.190968	-0.07	0.145821
Tiller_Number_Week_7_Raw	Lodging	0	0.954779	-0.01	0.800275
Tiller_Number_Week_7_Raw	Spike_Density	-0.03	0.562556	0.02	0.666535
Tiller_Number_Week_7_Raw	Tillering_Rate	0.79	0	0.77	0
Tiller_Number_Week_7_Raw	Weeks_Increasing_Raw	0.15	0.00265035	0.15	0.00448984
Weeks_Increasing_Raw	Lodging	-0.11	0.0488148	-0.1	0.0612596
Weeks_Increasing_Raw	Spike_Density	-0.09	0.0928584	-0.11	0.0383947
Weeks_Increasing_Raw	Tillering_Rate	-0.43	0	-0.44	0

## Sheet: 2015_6-Row
Trait 1	Trait 2	Pearson Correlation	Pearson p-value	Spearman Correlation	Spearman p-value
Days_to_Heading_Raw	Fifty_Kernel_Weight_Raw	-0.19	0.000220459	-0.14	0.00498439
Days_to_Heading_Raw	Leaf_Width_Raw	0.26	3.77687e-07	0.26	3.42004e-07
Days_to_Heading_Raw	Lodging	0.12	0.0282195	0.17	0.00120688
Days_to_Heading_Raw	Percent_Productive_Tillers	-0.44	0	-0.48	0
Days_to_Heading_Raw	Plant_Height_Raw	0.38	1.59872e-14	0.39	3.9968e-15
Days_to_Heading_Raw	Seeds_Per_Spike_Raw	0.11	0.024475	0.2	5.85041e-05
Days_to_Heading_Raw	Spike_Density	-0.04	0.439874	0.01	0.900934
Days_to_Heading_Raw	Spike_Length_Raw	0.21	2.269e-05	0.23	3.5302e-06
Days_to_Heading_Raw	Spike_Row_Type	0.07	0.176589	0.06	0.202871
Days_to_Heading_Raw	Stem_Diameter_Raw	0.07	0.146936	0.08	0.0994221
Days_to_Heading_Raw	Tiller_Number_Maximum_Raw	0.52	0	0.46	0
Days_to_Heading_Raw	Tiller_Number_Non_Productive_Raw	0.51	0	0.54	0
Days_to_Heading_Raw	Tiller_Number_Productive_Raw	0.08	0.141774	0.04	0.405175
Days_to_Heading_Raw	Tiller_Number_Week_2	-0.06	0.218804	-0.03	0.584623
Days_to_Heading_Raw	Tiller_Number_Week_3_Raw	0.08	0.137289	0.09	0.0797805
Days_to_Heading_Raw	Tiller_Number_Week_4	0.37	3.28626e-14	0.43	0
Days_to_Heading_Raw	Tiller_Number_Week_5_Raw	0.54	0	0.54	0
Days_to_Heading_Raw	Tiller_Number_Week_6_Raw	0.54	0	0.49	0
Days_to_Heading_Raw	Tiller_Number_Week_7_Raw	0.47	0	0.33	1.5496e-11
Days_to_Heading_Raw	Tillering_Rate	0.53	0	0.53	0
Days_to_Heading_Raw	Weeks_Increasing_Raw	-0.15	0.00358163	-0.22	8.08538e-06
Fifty_Kernel_Weight_Raw	Leaf_Width_Raw	0	0.928298	0.01	0.827307
Fifty_Kernel_Weight_Raw	Lodging	0.07	0.159565	0	0.942073
Fifty_Kernel_Weight_Raw	Percent_Productive_Tillers	0.16	0.00227199	0.16	0.00191022
Fifty_Kernel_Weight_Raw	Plant_Height_Raw	0.04	0.386474	0.03	0.608188
Fifty_Kernel_Weight_Raw	Seeds_Per_Spike_Raw	-0.17	0.000817543	-0.17	0.000612632
Fifty_Kernel_Weight_Raw	Spike_Density	-0.19	0.000168725	-0.17	0.000771114
Fifty_Kernel_Weight_Raw	Spike_Length_Raw	0.05	0.307869	0.06	0.265675
Fifty_Kernel_Weight_Raw	Spike_Row_Type	0.13	0.0114933	0.13	0.0112935
Fifty_Kernel_Weight_Raw	Stem_Diameter_Raw	0.08	0.0941306	0.07	0.17724
Fifty_Kernel_Weight_Raw	Tiller_Number_Maximum_Raw	-0.21	4.48394e-05	-0.17	0.00095684
Fifty_Kernel_Weight_Raw	Tiller_Number_Non_Productive_Raw	-0.21	2.83515e-05	-0.18	0.000438917
Fifty_Kernel_Weight_Raw	Tiller_Number_Productive_Raw	-0.04	0.40095	-0.04	0.430162
Fifty_Kernel_Weight_Raw	Tiller_Number_Week_2	0.1	0.0428464	0.08	0.123961
Fifty_Kernel_Weight_Raw	Tiller_Number_Week_3_Raw	0.08	0.113985	0.06	0.26277
Fifty_Kernel_Weight_Raw	Tiller_Number_Week_4	-0.04	0.396263	-0.06	0.270985
Fifty_Kernel_Weight_Raw	Tiller_Number_Week_5_Raw	-0.19	0.00023641	-0.16	0.00122842
Fifty_Kernel_Weight_Raw	Tiller_Number_Week_6_Raw	-0.22	7.91125e-06	-0.18	0.000255676
Fifty_Kernel_Weight_Raw	Tiller_Number_Week_7_Raw	-0.17	0.000810182	-0.15	0.00324137
Fifty_Kernel_Weight_Raw	Tillering_Rate	-0.19	0.000170476	-0.16	0.00117752
Fifty_Kernel_Weight_Raw	Weeks_Increasing_Raw	-0.01	0.862907	0	0.979148
Leaf_Width_Raw	Lodging	-0.05	0.337698	-0.05	0.303241
Leaf_Width_Raw	Percent_Productive_Tillers	-0.15	0.00491302	-0.14	0.00564655
Leaf_Width_Raw	Plant_Height_Raw	0.26	5.88308e-07	0.27	1.27795e-07
Leaf_Width_Raw	Seeds_Per_Spike_Raw	0.37	1.47438e-13	0.36	8.21565e-13
Leaf_Width_Raw	Spike_Density	0.16	0.00244009	0.15	0.00389498
Leaf_Width_Raw	Spike_Length_Raw	0.21	3.43691e-05	0.21	3.19615e-05
Leaf_Width_Raw	Spike_Row_Type	0.06	0.222866	0.06	0.239586
Leaf_Width_Raw	Stem_Diameter_Raw	0.51	0	0.48	0
Leaf_Width_Raw	Tiller_Number_Maximum_Raw	-0.08	0.139786	-0.08	0.109415
Leaf_Width_Raw	Tiller_Number_Non_Productive_Raw	0.03	0.564945	0.06	0.246212
Leaf_Width_Raw	Tiller_Number_Productive_Raw	-0.2	0.000110192	-0.21	3.24686e-05
Leaf_Width_Raw	Tiller_Number_Week_2	-0.04	0.486899	-0.06	0.229642
Leaf_Width_Raw	Tiller_Number_Week_3_Raw	-0.04	0.431984	-0.07	0.163888
Leaf_Width_Raw	Tiller_Number_Week_4	-0.05	0.328977	-0.05	0.369105
Leaf_Width_Raw	Tiller_Number_Week_5_Raw	-0.05	0.384267	-0.03	0.535708
Leaf_Width_Raw	Tiller_Number_Week_6_Raw	-0.06	0.226065	-0.06	0.24268
Leaf_Width_Raw	Tiller_Number_Week_7_Raw	-0.12	0.0181445	-0.16	0.0021679
Leaf_Width_Raw	Tillering_Rate	-0.01	0.797065	0	0.959724
Leaf_Width_Raw	Weeks_Increasing_Raw	-0.22	2.69937e-05	-0.19	0.000168125
Lodging	Spike_Density	-0.21	7.41697e-05	-0.13	0.0152529
Lodging	Spike_Row_Type	0.05	0.336257	0.03	0.541401
Lodging	Tillering_Rate	0.23	1.16882e-05	0.23	1.45451e-05
Percent_Productive_Tillers	Lodging	-0.04	0.4175	-0.07	0.183815
Percent_Productive_Tillers	Plant_Height_Raw	0.01	0.794864	-0.02	0.758979
Percent_Productive_Tillers	Seeds_Per_Spike_Raw	-0.07	0.178172	-0.09	0.0804997
Percent_Productive_Tillers	Spike_Density	0.01	0.861238	0.01	0.849366
Percent_Productive_Tillers	Spike_Length_Raw	-0.08	0.115629	-0.07	0.173517
Percent_Productive_Tillers	Spike_Row_Type	0.04	0.391126	0.05	0.288776
Percent_Productive_Tillers	Stem_Diameter_Raw	-0.04	0.4524	-0.04	0.458777
Percent_Productive_Tillers	Tiller_Number_Maximum_Raw	-0.51	0	-0.53	0
Percent_Productive_Tillers	Tiller_Number_Non_Productive_Raw	-0.84	0	-0.9	0
Percent_Productive_Tillers	Tiller_Number_Productive_Raw	0.32	1.3941e-10	0.28	1.54906e-08
Percent_Productive_Tillers	Tiller_Number_Week_2	-0.17	0.000678275	-0.18	0.000315098
Percent_Productive_Tillers	Tiller_Number_Week_3_Raw	-0.18	0.000451232	-0.18	0.000352755
Percent_Productive_Tillers	Tiller_Number_Week_4	-0.37	9.59233e-14	-0.4	8.88178e-16
Percent_Productive_Tillers	Tiller_Number_Week_5_Raw	-0.46	0	-0.5	0
Percent_Productive_Tillers	Tiller_Number_Week_6_Raw	-0.48	0	-0.49	0
Percent_Productive_Tillers	Tiller_Number_Week_7_Raw	-0.37	1.18794e-13	-0.37	1.15463e-13
Percent_Productive_Tillers	Tillering_Rate	-0.52	0	-0.55	0
Percent_Productive_Tillers	Weeks_Increasing_Raw	0.16	0.00230312	0.15	0.00363736
Plant_Height_Raw	Lodging	0.29	1.13423e-08	0.27	1.21867e-07
Plant_Height_Raw	Seeds_Per_Spike_Raw	0.31	8.58093e-10	0.33	9.38019e-11
Plant_Height_Raw	Spike_Density	-0.1	0.0489058	-0.07	0.204576
Plant_Height_Raw	Spike_Length_Raw	0.47	0	0.48	0
Plant_Height_Raw	Spike_Row_Type	0.07	0.160383	0.09	0.0871957
Plant_Height_Raw	Stem_Diameter_Raw	0.19	0.000199904	0.21	4.29092e-05
Plant_Height_Raw	Tiller_Number_Maximum_Raw	0.03	0.519529	0.01	0.788332
Plant_Height_Raw	Tiller_Number_Non_Productive_Raw	0.02	0.718114	0.02	0.657872
Plant_Height_Raw	Tiller_Number_Productive_Raw	0.03	0.558189	0.04	0.460379
Plant_Height_Raw	Tiller_Number_Week_2	-0.03	0.555577	-0.04	0.468783
Plant_Height_Raw	Tiller_Number_Week_3_Raw	0	0.939307	-0.01	0.844101
Plant_Height_Raw	Tiller_Number_Week_4	0.1	0.0618788	0.1	0.0593275
Plant_Height_Raw	Tiller_Number_Week_5_Raw	0.1	0.0588739	0.08	0.135553
Plant_Height_Raw	Tiller_Number_Week_6_Raw	0.04	0.424968	0.02	0.705664
Plant_Height_Raw	Tiller_Number_Week_7_Raw	-0.03	0.533502	-0.05	0.361074
Plant_Height_Raw	Tillering_Rate	0.11	0.0306324	0.1	0.0637325
Plant_Height_Raw	Weeks_Increasing_Raw	-0.21	5.39892e-05	-0.2	0.000105027
Ppd_H1_Geno	Days_to_Heading_Raw	0.17	0.000930758	0.19	0.000217115
Ppd_H1_Geno	Fifty_Kernel_Weight_Raw	-0.08	0.112629	-0.08	0.106327
Ppd_H1_Geno	Leaf_Width_Raw	0.28	4.44553e-08	0.27	1.37521e-07
Ppd_H1_Geno	Lodging	-0.11	0.0416923	-0.11	0.041696
Ppd_H1_Geno	Percent_Productive_Tillers	-0.03	0.535248	-0.04	0.467228
Ppd_H1_Geno	Plant_Height_Raw	0.28	5.53114e-08	0.28	3.73126e-08
Ppd_H1_Geno	Seeds_Per_Spike_Raw	0.24	1.13456e-06	0.26	1.87088e-07
Ppd_H1_Geno	Spike_Density	-0.05	0.371784	-0.01	0.821478
Ppd_H1_Geno	Spike_Length_Raw	0.34	9.48441e-12	0.33	1.56581e-11
Ppd_H1_Geno	Spike_Row_Type	0.06	0.2619	0.06	0.2619
Ppd_H1_Geno	Stem_Diameter_Raw	0.29	6.32114e-09	0.29	3.57979e-09
Ppd_H1_Geno	Tiller_Number_Maximum_Raw	-0.07	0.178112	-0.04	0.385162
Ppd_H1_Geno	Tiller_Number_Non_Productive_Raw	-0.04	0.454373	0	0.957274
Ppd_H1_Geno	Tiller_Number_Productive_Raw	-0.06	0.260277	-0.06	0.242802
Ppd_H1_Geno	Tiller_Number_Week_2	-0.09	0.0839195	-0.1	0.0491704
Ppd_H1_Geno	Tiller_Number_Week_3_Raw	-0.12	0.0171404	-0.12	0.0156316
Ppd_H1_Geno	Tiller_Number_Week_4	-0.14	0.00524506	-0.11	0.0285092
Ppd_H1_Geno	Tiller_Number_Week_5_Raw	-0.08	0.123514	-0.04	0.395576
Ppd_H1_Geno	Tiller_Number_Week_6_Raw	-0.05	0.304219	-0.02	0.646764
Ppd_H1_Geno	Tiller_Number_Week_7_Raw	-0.03	0.593162	-0.02	0.626239
Ppd_H1_Geno	Tillering_Rate	-0.09	0.0882312	-0.04	0.449405
Ppd_H1_Geno	Weeks_Increasing_Raw	-0.01	0.817998	0.01	0.892875
Seeds_Per_Spike_Raw	Lodging	-0.02	0.730285	0	0.978587
Seeds_Per_Spike_Raw	Spike_Density	0.62	0	0.63	0
Seeds_Per_Spike_Raw	Spike_Length_Raw	0.31	8.37933e-10	0.36	1.96065e-13
Seeds_Per_Spike_Raw	Spike_Row_Type	-0.03	0.51064	-0.04	0.467169
Seeds_Per_Spike_Raw	Stem_Diameter_Raw	0.47	0	0.48	0
Seeds_Per_Spike_Raw	Tiller_Number_Maximum_Raw	-0.07	0.172833	-0.02	0.679742
Seeds_Per_Spike_Raw	Tiller_Number_Non_Productive_Raw	0	0.948321	0.06	0.247962
Seeds_Per_Spike_Raw	Tiller_Number_Productive_Raw	-0.09	0.0695038	-0.07	0.205029
Seeds_Per_Spike_Raw	Tiller_Number_Week_2	0.03	0.510984	0.04	0.390241
Seeds_Per_Spike_Raw	Tiller_Number_Week_3_Raw	0.03	0.548418	0.04	0.385987
Seeds_Per_Spike_Raw	Tiller_Number_Week_4	0.05	0.356962	0.08	0.127034
Seeds_Per_Spike_Raw	Tiller_Number_Week_5_Raw	-0.02	0.700896	0.03	0.591461
Seeds_Per_Spike_Raw	Tiller_Number_Week_6_Raw	-0.05	0.336305	0.01	0.848331
Seeds_Per_Spike_Raw	Tiller_Number_Week_7_Raw	-0.14	0.00719353	-0.08	0.110708
Seeds_Per_Spike_Raw	Tillering_Rate	-0.01	0.890959	0.04	0.378676
Seeds_Per_Spike_Raw	Weeks_Increasing_Raw	-0.17	0.000852859	-0.16	0.00135309
Spike_Density	Tillering_Rate	-0.12	0.0227029	-0.08	0.1199
Spike_Length_Raw	Lodging	0.2	9.52499e-05	0.19	0.000338667
Spike_Length_Raw	Spike_Density	-0.52	0	-0.42	0
Spike_Length_Raw	Spike_Row_Type	0.02	0.752414	0.01	0.773445
Spike_Length_Raw	Stem_Diameter_Raw	0.21	3.04934e-05	0.23	4.22635e-06
Spike_Length_Raw	Tiller_Number_Maximum_Raw	0.13	0.00935712	0.13	0.0112184
Spike_Length_Raw	Tiller_Number_Non_Productive_Raw	0.09	0.0794918	0.11	0.0377066
Spike_Length_Raw	Tiller_Number_Productive_Raw	0.1	0.0634177	0.07	0.167078
Spike_Length_Raw	Tiller_Number_Week_2	0.11	0.0363716	0.09	0.0705509
Spike_Length_Raw	Tiller_Number_Week_3_Raw	0.09	0.081635	0.07	0.144948
Spike_Length_Raw	Tiller_Number_Week_4	0.1	0.0528907	0.1	0.04298
Spike_Length_Raw	Tiller_Number_Week_5_Raw	0.13	0.00784141	0.14	0.00649488
Spike_Length_Raw	Tiller_Number_Week_6_Raw	0.14	0.00595309	0.14	0.00529715
Spike_Length_Raw	Tiller_Number_Week_7_Raw	0.12	0.0169654	0.11	0.0349769
Spike_Length_Raw	Tillering_Rate	0.14	0.00604242	0.15	0.00360127
Spike_Length_Raw	Weeks_Increasing_Raw	-0.07	0.14742	-0.05	0.287103
Spike_Row_Type	Spike_Density	-0.03	0.493869	-0.05	0.369425
Spike_Row_Type	Tillering_Rate	0.07	0.165496	0.08	0.134255
Stem_Diameter_Raw	Lodging	-0.15	0.00494218	-0.13	0.0166736
Stem_Diameter_Raw	Spike_Density	0.29	9.80836e-09	0.28	1.35693e-08
Stem_Diameter_Raw	Spike_Row_Type	0.1	0.0472813	0.08	0.112446
Stem_Diameter_Raw	Tiller_Number_Maximum_Raw	-0.2	5.78611e-05	-0.19	0.000145628
Stem_Diameter_Raw	Tiller_Number_Non_Productive_Raw	-0.1	0.0517117	-0.05	0.292356
Stem_Diameter_Raw	Tiller_Number_Productive_Raw	-0.23	7.88383e-06	-0.22	1.69313e-05
Stem_Diameter_Raw	Tiller_Number_Week_2	-0.13	0.0132052	-0.11	0.0307868
Stem_Diameter_Raw	Tiller_Number_Week_3_Raw	-0.15	0.00273966	-0.13	0.0116386
Stem_Diameter_Raw	Tiller_Number_Week_4	-0.21	2.31425e-05	-0.16	0.00109882
Stem_Diameter_Raw	Tiller_Number_Week_5_Raw	-0.19	0.000129371	-0.16	0.00163885
Stem_Diameter_Raw	Tiller_Number_Week_6_Raw	-0.17	0.000577288	-0.15	0.00232407
Stem_Diameter_Raw	Tiller_Number_Week_7_Raw	-0.18	0.000258584	-0.2	7.29102e-05
Stem_Diameter_Raw	Tillering_Rate	-0.2	7.13696e-05	-0.16	0.0013479
Stem_Diameter_Raw	Weeks_Increasing_Raw	-0.05	0.290279	-0.01	0.771935
Tiller_Number_Maximum_Raw	Lodging	0.22	1.56621e-05	0.21	4.13735e-05
Tiller_Number_Maximum_Raw	Spike_Density	-0.16	0.00177338	-0.13	0.00971713
Tiller_Number_Maximum_Raw	Spike_Row_Type	0.07	0.200176	0.07	0.148068
Tiller_Number_Maximum_Raw	Tiller_Number_Non_Productive_Raw	0.86	0	0.83	0
Tiller_Number_Maximum_Raw	Tiller_Number_Productive_Raw	0.6	0	0.59	0
Tiller_Number_Maximum_Raw	Tiller_Number_Week_2	0.36	4.05231e-13	0.39	1.33227e-15
Tiller_Number_Maximum_Raw	Tiller_Number_Week_3_Raw	0.41	0	0.45	0
Tiller_Number_Maximum_Raw	Tiller_Number_Week_4	0.72	0	0.73	0
Tiller_Number_Maximum_Raw	Tiller_Number_Week_5_Raw	0.94	0	0.94	0
Tiller_Number_Maximum_Raw	Tiller_Number_Week_6_Raw	0.98	0	0.97	0
Tiller_Number_Maximum_Raw	Tiller_Number_Week_7_Raw	0.92	0	0.92	0
Tiller_Number_Maximum_Raw	Tillering_Rate	0.93	0	0.92	0
Tiller_Number_Maximum_Raw	Weeks_Increasing_Raw	0.07	0.197583	0.07	0.164741
Tiller_Number_Non_Productive_Raw	Lodging	0.14	0.00680065	0.14	0.00630729
Tiller_Number_Non_Productive_Raw	Spike_Density	-0.08	0.140171	-0.06	0.245745
Tiller_Number_Non_Productive_Raw	Spike_Row_Type	0.02	0.727864	0	0.945136
Tiller_Number_Non_Productive_Raw	Tiller_Number_Productive_Raw	0.11	0.0247694	0.1	0.0571196
Tiller_Number_Non_Productive_Raw	Tiller_Number_Week_2	0.29	4.15092e-09	0.32	1.3232e-10
Tiller_Number_Non_Productive_Raw	Tiller_Number_Week_3_Raw	0.32	2.43446e-10	0.34	9.77929e-12
Tiller_Number_Non_Productive_Raw	Tiller_Number_Week_4	0.6	0	0.61	0
Tiller_Number_Non_Productive_Raw	Tiller_Number_Week_5_Raw	0.8	0	0.78	0
Tiller_Number_Non_Productive_Raw	Tiller_Number_Week_6_Raw	0.83	0	0.79	0
Tiller_Number_Non_Productive_Raw	Tiller_Number_Week_7_Raw	0.72	0	0.67	0
Tiller_Number_Non_Productive_Raw	Tillering_Rate	0.84	0	0.8	0
Tiller_Number_Non_Productive_Raw	Weeks_Increasing_Raw	-0.06	0.28263	-0.07	0.166601
Tiller_Number_Productive_Raw	Lodging	0.21	4.92609e-05	0.19	0.000192373
Tiller_Number_Productive_Raw	Spike_Density	-0.15	0.0038628	-0.09	0.0651996
Tiller_Number_Productive_Raw	Spike_Row_Type	0.1	0.0586911	0.1	0.0412922
Tiller_Number_Productive_Raw	Tiller_Number_Week_2	0.3	3.01556e-09	0.27	8.86948e-08
Tiller_Number_Productive_Raw	Tiller_Number_Week_3_Raw	0.32	1.56376e-10	0.32	2.31805e-10
Tiller_Number_Productive_Raw	Tiller_Number_Week_4	0.46	0	0.43	0
Tiller_Number_Productive_Raw	Tiller_Number_Week_5_Raw	0.59	0	0.56	0
Tiller_Number_Productive_Raw	Tiller_Number_Week_6_Raw	0.6	0	0.59	0
Tiller_Number_Productive_Raw	Tiller_Number_Week_7_Raw	0.65	0	0.64	0
Tiller_Number_Productive_Raw	Tillering_Rate	0.51	0	0.49	0
Tiller_Number_Productive_Raw	Weeks_Increasing_Raw	0.17	0.00120451	0.16	0.00163791
Tiller_Number_Week_2	Lodging	0.1	0.0686709	0.06	0.220402
Tiller_Number_Week_2	Spike_Density	-0.07	0.164782	-0.06	0.226278
Tiller_Number_Week_2	Spike_Row_Type	0.08	0.107876	0.09	0.0776864
Tiller_Number_Week_2	Tiller_Number_Week_3_Raw	0.8	0	0.78	0
Tiller_Number_Week_2	Tiller_Number_Week_4	0.68	0	0.67	0
Tiller_Number_Week_2	Tiller_Number_Week_5_Raw	0.42	0	0.44	0
Tiller_Number_Week_2	Tiller_Number_Week_6_Raw	0.33	1.80065e-11	0.36	1.67644e-13
Tiller_Number_Week_2	Tiller_Number_Week_7_Raw	0.27	4.2653e-08	0.3	1.18154e-09
Tiller_Number_Week_2	Tillering_Rate	0.41	0	0.43	0
Tiller_Number_Week_2	Weeks_Increasing_Raw	-0.17	0.00101397	-0.18	0.000494088
Tiller_Number_Week_3_Raw	Lodging	0.09	0.0986334	0.07	0.16674
Tiller_Number_Week_3_Raw	Spike_Density	-0.05	0.315968	-0.04	0.469162
Tiller_Number_Week_3_Raw	Spike_Row_Type	0.04	0.441872	0.04	0.465688
Tiller_Number_Week_3_Raw	Tiller_Number_Week_4	0.73	0	0.73	0
Tiller_Number_Week_3_Raw	Tiller_Number_Week_5_Raw	0.49	0	0.5	0
Tiller_Number_Week_3_Raw	Tiller_Number_Week_6_Raw	0.39	8.88178e-16	0.43	0
Tiller_Number_Week_3_Raw	Tiller_Number_Week_7_Raw	0.32	5.12497e-11	0.36	1.90514e-13
Tiller_Number_Week_3_Raw	Tillering_Rate	0.48	0	0.49	0
Tiller_Number_Week_3_Raw	Weeks_Increasing_Raw	-0.2	7.41564e-05	-0.19	0.000136979
Tiller_Number_Week_4	Lodging	0.17	0.000939967	0.16	0.00180017
Tiller_Number_Week_4	Spike_Density	-0.05	0.320592	-0.02	0.639245
Tiller_Number_Week_4	Spike_Row_Type	0.09	0.080154	0.08	0.128986
Tiller_Number_Week_4	Tiller_Number_Week_5_Raw	0.82	0	0.82	0
Tiller_Number_Week_4	Tiller_Number_Week_6_Raw	0.71	0	0.72	0
Tiller_Number_Week_4	Tiller_Number_Week_7_Raw	0.57	0	0.58	0
Tiller_Number_Week_4	Tillering_Rate	0.78	0	0.78	0
Tiller_Number_Week_4	Weeks_Increasing_Raw	-0.22	1.44842e-05	-0.23	5.53892e-06
Tiller_Number_Week_5_Raw	Lodging	0.22	2.25665e-05	0.22	2.90488e-05
Tiller_Number_Week_5_Raw	Spike_Density	-0.12	0.0212571	-0.09	0.0726539
Tiller_Number_Week_5_Raw	Spike_Row_Type	0.07	0.166091	0.08	0.13856
Tiller_Number_Week_5_Raw	Tiller_Number_Week_6_Raw	0.93	0	0.93	0
Tiller_Number_Week_5_Raw	Tiller_Number_Week_7_Raw	0.82	0	0.81	0
Tiller_Number_Week_5_Raw	Tillering_Rate	0.96	0	0.95	0
Tiller_Number_Week_5_Raw	Weeks_Increasing_Raw	-0.13	0.012924	-0.14	0.00646901
Tiller_Number_Week_6_Raw	Lodging	0.24	3.36752e-06	0.22	1.52552e-05
Tiller_Number_Week_6_Raw	Spike_Density	-0.14	0.00493826	-0.11	0.0288032
Tiller_Number_Week_6_Raw	Spike_Row_Type	0.09	0.0730106	0.1	0.0392105
Tiller_Number_Week_6_Raw	Tiller_Number_Week_7_Raw	0.89	0	0.89	0
Tiller_Number_Week_6_Raw	Tillering_Rate	0.91	0	0.89	0
Tiller_Number_Week_6_Raw	Weeks_Increasing_Raw	0.07	0.194437	0.08	0.117521
Tiller_Number_Week_7_Raw	Lodging	0.17	0.00131034	0.15	0.00338743
Tiller_Number_Week_7_Raw	Spike_Density	-0.2	9.0207e-05	-0.16	0.00111796
Tiller_Number_Week_7_Raw	Spike_Row_Type	0.07	0.175506	0.08	0.107948
Tiller_Number_Week_7_Raw	Tillering_Rate	0.78	0	0.75	0
Tiller_Number_Week_7_Raw	Weeks_Increasing_Raw	0.27	1.04437e-07	0.28	1.31881e-08
Weeks_Increasing_Raw	Lodging	-0.07	0.165088	-0.05	0.306412
Weeks_Increasing_Raw	Spike_Density	-0.07	0.152776	-0.11	0.0317126
Weeks_Increasing_Raw	Spike_Row_Type	-0.03	0.509977	-0.02	0.643542
Weeks_Increasing_Raw	Tillering_Rate	-0.27	6.04369e-08	-0.3	9.44943e-10

## Sheet: 2015_Ppd-H1_D
Trait 1	Trait 2	Pearson Correlation	Pearson p-value	Spearman Correlation	Spearman p-value
Days_to_Heading_Raw	Fifty_Kernel_Weight_Raw	-0.19	0.000422246	-0.180398	0.000960881
Days_to_Heading_Raw	Leaf_Width_Raw	0.41	1.37668e-14	0.443548	0
Days_to_Heading_Raw	Lodging	0.25	6.21404e-06	0.2896	1.53174e-07
Days_to_Heading_Raw	Percent_Productive_Tillers	-0.58	0	-0.566992	0
Days_to_Heading_Raw	Plant_Height_Raw	0.32	5.3587e-09	0.311791	1.27527e-08
Days_to_Heading_Raw	Seeds_Per_Spike_Raw	0.23	2.33079e-05	0.352265	4.48004e-11
Days_to_Heading_Raw	Spike_Density	0.14	0.00960853	0.228021	2.89336e-05
Days_to_Heading_Raw	Spike_Length_Raw	0.07	0.190551	0.0570368	0.300117
Days_to_Heading_Raw	Spike_Row_Type	0.16	0.00356292	0.237785	1.1907e-05
Days_to_Heading_Raw	Stem_Diameter_Raw	0.01	0.903968	0.108634	0.0479518
Days_to_Heading_Raw	Tiller_Number_Maximum_Raw	0.49	0	0.376636	1.24833e-12
Days_to_Heading_Raw	Tiller_Number_Non_Productive_Raw	0.57	0	0.561523	0
Days_to_Heading_Raw	Tiller_Number_Productive_Raw	-0.13	0.0174906	-0.135491	0.0149711
Days_to_Heading_Raw	Tiller_Number_Week_2	0	0.986947	0.0381678	0.488259
Days_to_Heading_Raw	Tiller_Number_Week_3_Raw	0.08	0.146235	0.0550116	0.317632
Days_to_Heading_Raw	Tiller_Number_Week_4	0.45	0	0.435023	0
Days_to_Heading_Raw	Tiller_Number_Week_5_Raw	0.56	0	0.482761	0
Days_to_Heading_Raw	Tiller_Number_Week_6_Raw	0.53	0	0.400642	3.13083e-14
Days_to_Heading_Raw	Tiller_Number_Week_7_Raw	0.36	8.50231e-12	0.185334	0.000689666
Days_to_Heading_Raw	Tillering_Rate	0.56	0	0.504231	0
Days_to_Heading_Raw	Weeks_Increasing_Raw	-0.29	1.16949e-07	-0.403035	2.13163e-14
Fifty_Kernel_Weight_Raw	Leaf_Width_Raw	-0.19	0.000624655	-0.205125	0.000236091
Fifty_Kernel_Weight_Raw	Lodging	-0.01	0.863336	-0.0628227	0.26476
Fifty_Kernel_Weight_Raw	Percent_Productive_Tillers	0.21	0.000107095	0.182967	0.000972571
Fifty_Kernel_Weight_Raw	Plant_Height_Raw	0.01	0.883652	-0.0134231	0.81125
Fifty_Kernel_Weight_Raw	Seeds_Per_Spike_Raw	-0.45	0	-0.437027	0
Fifty_Kernel_Weight_Raw	Spike_Density	-0.48	0	-0.454243	0
Fifty_Kernel_Weight_Raw	Spike_Length_Raw	0.32	2.17688e-09	0.319858	2.46896e-09
Fifty_Kernel_Weight_Raw	Spike_Row_Type	-0.41	3.9968e-15	-0.423298	8.88178e-16
Fifty_Kernel_Weight_Raw	Stem_Diameter_Raw	-0.15	0.00697905	-0.149507	0.00634822
Fifty_Kernel_Weight_Raw	Tiller_Number_Maximum_Raw	-0.09	0.0960236	-0.00820962	0.881534
Fifty_Kernel_Weight_Raw	Tiller_Number_Non_Productive_Raw	-0.21	0.000120701	-0.130293	0.0193405
Fifty_Kernel_Weight_Raw	Tiller_Number_Productive_Raw	0.15	0.00538819	0.163277	0.00330065
Fifty_Kernel_Weight_Raw	Tiller_Number_Week_2	0.25	3.00037e-06	0.239287	1.04441e-05
Fifty_Kernel_Weight_Raw	Tiller_Number_Week_3_Raw	0.32	1.95786e-09	0.332333	5.30062e-10
Fifty_Kernel_Weight_Raw	Tiller_Number_Week_4	0.07	0.203571	0.0958352	0.0812236
Fifty_Kernel_Weight_Raw	Tiller_Number_Week_5_Raw	-0.06	0.255261	0.0139427	0.800189
Fifty_Kernel_Weight_Raw	Tiller_Number_Week_6_Raw	-0.11	0.0460198	-0.0335592	0.542297
Fifty_Kernel_Weight_Raw	Tiller_Number_Week_7_Raw	-0.02	0.703646	0.0220582	0.688824
Fifty_Kernel_Weight_Raw	Tillering_Rate	-0.1	0.056418	-0.0241936	0.660494
Fifty_Kernel_Weight_Raw	Weeks_Increasing_Raw	0.03	0.559786	0.042503	0.440192
Leaf_Width_Raw	Lodging	0.22	0.000113237	0.219219	8.97225e-05
Leaf_Width_Raw	Percent_Productive_Tillers	-0.22	7.67347e-05	-0.228503	4.01239e-05
Leaf_Width_Raw	Plant_Height_Raw	0.22	6.00261e-05	0.241633	1.36278e-05
Leaf_Width_Raw	Seeds_Per_Spike_Raw	0.5	0	0.517666	0
Leaf_Width_Raw	Spike_Density	0.4	1.98952e-13	0.414437	1.66533e-14
Leaf_Width_Raw	Spike_Length_Raw	-0.06	0.252329	-0.0830068	0.14032
Leaf_Width_Raw	Spike_Row_Type	0.42	3.10862e-15	0.421227	4.44089e-15
Leaf_Width_Raw	Stem_Diameter_Raw	0.57	0	0.557432	0
Leaf_Width_Raw	Tiller_Number_Maximum_Raw	-0.09	0.0992277	-0.103278	0.0662884
Leaf_Width_Raw	Tiller_Number_Non_Productive_Raw	0.1	0.0893693	0.129547	0.0210475
Leaf_Width_Raw	Tiller_Number_Productive_Raw	-0.31	2.56774e-08	-0.29287	1.09201e-07
Leaf_Width_Raw	Tiller_Number_Week_2	-0.1	0.0868884	-0.0971121	0.0842965
Leaf_Width_Raw	Tiller_Number_Week_3_Raw	-0.22	8.58624e-05	-0.230755	3.34854e-05
Leaf_Width_Raw	Tiller_Number_Week_4	-0.02	0.722113	-0.0269633	0.632466
Leaf_Width_Raw	Tiller_Number_Week_5_Raw	-0.02	0.680844	-0.0318195	0.572458
Leaf_Width_Raw	Tiller_Number_Week_6_Raw	-0.06	0.298738	-0.0715028	0.204203
Leaf_Width_Raw	Tiller_Number_Week_7_Raw	-0.19	0.000575331	-0.203162	0.000271641
Leaf_Width_Raw	Tillering_Rate	0	0.989976	0.00756418	0.893287
Leaf_Width_Raw	Weeks_Increasing_Raw	-0.24	2.02741e-05	-0.247224	8.44298e-06
Lodging	Spike_Density	0.11	0.049514	0.13568	0.0159672
Lodging	Spike_Row_Type	0.26	2.43478e-06	0.252447	5.34267e-06
Lodging	Tillering_Rate	0.24	2.00907e-05	0.214971	0.000114543
Percent_Productive_Tillers	Lodging	-0.21	0.000125019	-0.232228	3.06001e-05
Percent_Productive_Tillers	Plant_Height_Raw	-0.03	0.584615	-0.0265184	0.637029
Percent_Productive_Tillers	Seeds_Per_Spike_Raw	-0.26	2.02643e-06	-0.263572	1.74185e-06
Percent_Productive_Tillers	Spike_Density	-0.19	0.000690449	-0.215693	0.000100569
Percent_Productive_Tillers	Spike_Length_Raw	0.05	0.405421	0.0616294	0.27018
Percent_Productive_Tillers	Spike_Row_Type	-0.25	7.71611e-06	-0.245373	8.42031e-06
Percent_Productive_Tillers	Stem_Diameter_Raw	-0.08	0.164041	-0.0851472	0.127324
Percent_Productive_Tillers	Tiller_Number_Maximum_Raw	-0.51	0	-0.493361	0
Percent_Productive_Tillers	Tiller_Number_Non_Productive_Raw	-0.86	0	-0.920995	0
Percent_Productive_Tillers	Tiller_Number_Productive_Raw	0.33	1.81882e-09	0.292044	9.45169e-08
Percent_Productive_Tillers	Tiller_Number_Week_2	-0.15	0.00652516	-0.153806	0.00568018
Percent_Productive_Tillers	Tiller_Number_Week_3_Raw	-0.09	0.113292	-0.102262	0.0668476
Percent_Productive_Tillers	Tiller_Number_Week_4	-0.4	9.50351e-14	-0.395682	1.63425e-13
Percent_Productive_Tillers	Tiller_Number_Week_5_Raw	-0.49	0	-0.494418	0
Percent_Productive_Tillers	Tiller_Number_Week_6_Raw	-0.5	0	-0.477381	0
Percent_Productive_Tillers	Tiller_Number_Week_7_Raw	-0.31	1.38453e-08	-0.288244	1.40658e-07
Percent_Productive_Tillers	Tillering_Rate	-0.56	0	-0.549786	0
Percent_Productive_Tillers	Weeks_Increasing_Raw	0.24	9.0332e-06	0.244173	9.34735e-06
Plant_Height_Raw	Lodging	0.33	1.62937e-09	0.317299	8.03142e-09
Plant_Height_Raw	Seeds_Per_Spike_Raw	0.24	1.28769e-05	0.259649	2.79622e-06
Plant_Height_Raw	Spike_Density	0.03	0.604672	0.0338329	0.548393
Plant_Height_Raw	Spike_Length_Raw	0.35	9.09823e-11	0.333109	1.05219e-09
Plant_Height_Raw	Spike_Row_Type	0.09	0.0939939	0.0962151	0.0862182
Plant_Height_Raw	Stem_Diameter_Raw	0.2	0.000230878	0.207937	0.000183836
Plant_Height_Raw	Tiller_Number_Maximum_Raw	-0.01	0.87206	-0.0431139	0.44286
Plant_Height_Raw	Tiller_Number_Non_Productive_Raw	0.04	0.507234	0.0110343	0.844366
Plant_Height_Raw	Tiller_Number_Productive_Raw	-0.07	0.212078	-0.063225	0.260196
Plant_Height_Raw	Tiller_Number_Week_2	0.05	0.371668	0.0486116	0.386855
Plant_Height_Raw	Tiller_Number_Week_3_Raw	0.03	0.633797	0.01369	0.807569
Plant_Height_Raw	Tiller_Number_Week_4	0.14	0.0101566	0.132171	0.0181883
Plant_Height_Raw	Tiller_Number_Week_5_Raw	0.08	0.140822	0.0446421	0.426846
Plant_Height_Raw	Tiller_Number_Week_6_Raw	-0.01	0.877374	-0.0344058	0.540355
Plant_Height_Raw	Tiller_Number_Week_7_Raw	-0.11	0.0404955	-0.131154	0.0191083
Plant_Height_Raw	Tillering_Rate	0.12	0.0366527	0.0818537	0.144658
Plant_Height_Raw	Weeks_Increasing_Raw	-0.29	1.24947e-07	-0.290967	1.21415e-07
Seeds_Per_Spike_Raw	Lodging	0.24	2.21451e-05	0.24182	1.42874e-05
Seeds_Per_Spike_Raw	Spike_Density	0.85	0	0.850104	0
Seeds_Per_Spike_Raw	Spike_Length_Raw	-0.23	2.53738e-05	-0.19939	0.00026736
Seeds_Per_Spike_Raw	Spike_Row_Type	0.77	0	0.730139	0
Seeds_Per_Spike_Raw	Stem_Diameter_Raw	0.51	0	0.542854	0
Seeds_Per_Spike_Raw	Tiller_Number_Maximum_Raw	-0.11	0.0443487	-0.148733	0.00679591
Seeds_Per_Spike_Raw	Tiller_Number_Non_Productive_Raw	0.13	0.0156951	0.135448	0.0153221
Seeds_Per_Spike_Raw	Tiller_Number_Productive_Raw	-0.39	7.4607e-13	-0.376077	3.44569e-12
Seeds_Per_Spike_Raw	Tiller_Number_Week_2	-0.23	2.33046e-05	-0.192597	0.000434139
Seeds_Per_Spike_Raw	Tiller_Number_Week_3_Raw	-0.38	1.66667e-12	-0.343248	1.47967e-10
Seeds_Per_Spike_Raw	Tiller_Number_Week_4	-0.05	0.386921	-0.0324109	0.55741
Seeds_Per_Spike_Raw	Tiller_Number_Week_5_Raw	-0.06	0.302045	-0.0866909	0.115996
Seeds_Per_Spike_Raw	Tiller_Number_Week_6_Raw	-0.07	0.175082	-0.103118	0.06133
Seeds_Per_Spike_Raw	Tiller_Number_Week_7_Raw	-0.25	5.80605e-06	-0.273376	4.56689e-07
Seeds_Per_Spike_Raw	Tillering_Rate	0	0.994829	-0.0202087	0.714549
Seeds_Per_Spike_Raw	Weeks_Increasing_Raw	-0.27	9.69641e-07	-0.28211	1.87251e-07
Spike_Density	Tillering_Rate	-0.1	0.0737475	-0.105751	0.0549645
Spike_Length_Raw	Lodging	0.12	0.0341868	0.0686726	0.222734
Spike_Length_Raw	Spike_Density	-0.65	0	-0.618064	0
Spike_Length_Raw	Spike_Row_Type	-0.44	0	-0.452407	0
Spike_Length_Raw	Stem_Diameter_Raw	-0.09	0.0894202	-0.103238	0.0602416
Spike_Length_Raw	Tiller_Number_Maximum_Raw	0.16	0.00453406	0.179334	0.00103097
Spike_Length_Raw	Tiller_Number_Non_Productive_Raw	0.02	0.661047	0.028227	0.613808
Spike_Length_Raw	Tiller_Number_Productive_Raw	0.22	6.61343e-05	0.236005	1.87654e-05
Spike_Length_Raw	Tiller_Number_Week_2	0.27	4.87647e-07	0.236426	1.33968e-05
Spike_Length_Raw	Tiller_Number_Week_3_Raw	0.31	4.80037e-09	0.296568	3.63465e-08
Spike_Length_Raw	Tiller_Number_Week_4	0.22	4.28709e-05	0.203721	0.00018605
Spike_Length_Raw	Tiller_Number_Week_5_Raw	0.17	0.0014309	0.206124	0.000155394
Spike_Length_Raw	Tiller_Number_Week_6_Raw	0.15	0.0056935	0.182106	0.000857522
Spike_Length_Raw	Tiller_Number_Week_7_Raw	0.17	0.00194871	0.192953	0.000406558
Spike_Length_Raw	Tillering_Rate	0.16	0.00448359	0.176653	0.00122887
Spike_Length_Raw	Weeks_Increasing_Raw	-0.05	0.392434	-0.0304884	0.579881
Spike_Row_Type	Spike_Density	0.75	0	0.728623	0
Spike_Row_Type	Tillering_Rate	-0.03	0.625176	-0.0794116	0.148803
Stem_Diameter_Raw	Lodging	0.02	0.699851	0.0229855	0.683507
Stem_Diameter_Raw	Spike_Density	0.45	0	0.462948	0
Stem_Diameter_Raw	Spike_Row_Type	0.4	5.83977e-14	0.3889	1.97176e-13
Stem_Diameter_Raw	Tiller_Number_Maximum_Raw	-0.26	1.83025e-06	-0.253264	2.95806e-06
Stem_Diameter_Raw	Tiller_Number_Non_Productive_Raw	-0.06	0.302267	-0.0258216	0.644348
Stem_Diameter_Raw	Tiller_Number_Productive_Raw	-0.34	2.72239e-10	-0.32234	3.21034e-09
Stem_Diameter_Raw	Tiller_Number_Week_2	-0.15	0.0048256	-0.139541	0.0109142
Stem_Diameter_Raw	Tiller_Number_Week_3_Raw	-0.28	3.26367e-07	-0.273669	4.09069e-07
Stem_Diameter_Raw	Tiller_Number_Week_4	-0.2	0.00018099	-0.161441	0.00317906
Stem_Diameter_Raw	Tiller_Number_Week_5_Raw	-0.22	5.35949e-05	-0.212389	9.62319e-05
Stem_Diameter_Raw	Tiller_Number_Week_6_Raw	-0.21	9.91719e-05	-0.207167	0.000143617
Stem_Diameter_Raw	Tiller_Number_Week_7_Raw	-0.3	3.76863e-08	-0.285682	1.18028e-07
Stem_Diameter_Raw	Tillering_Rate	-0.2	0.000322236	-0.180148	0.000976903
Stem_Diameter_Raw	Weeks_Increasing_Raw	-0.15	0.0062763	-0.136642	0.0127008
Tiller_Number_Maximum_Raw	Lodging	0.2	0.000422272	0.162818	0.00365082
Tiller_Number_Maximum_Raw	Spike_Density	-0.19	0.000656532	-0.208863	0.000132361
Tiller_Number_Maximum_Raw	Spike_Row_Type	-0.12	0.0254503	-0.183157	0.000799121
Tiller_Number_Maximum_Raw	Tiller_Number_Non_Productive_Raw	0.84	0	0.766855	0
Tiller_Number_Maximum_Raw	Tiller_Number_Productive_Raw	0.6	0	0.622321	0
Tiller_Number_Maximum_Raw	Tiller_Number_Week_2	0.35	3.55098e-11	0.40255	2.30926e-14
Tiller_Number_Maximum_Raw	Tiller_Number_Week_3_Raw	0.46	0	0.515384	0
Tiller_Number_Maximum_Raw	Tiller_Number_Week_4	0.73	0	0.732926	0
Tiller_Number_Maximum_Raw	Tiller_Number_Week_5_Raw	0.92	0	0.944251	0
Tiller_Number_Maximum_Raw	Tiller_Number_Week_6_Raw	0.97	0	0.969429	0
Tiller_Number_Maximum_Raw	Tiller_Number_Week_7_Raw	0.92	0	0.91385	0
Tiller_Number_Maximum_Raw	Tillering_Rate	0.93	0	0.90906	0
Tiller_Number_Maximum_Raw	Weeks_Increasing_Raw	-0.01	0.894258	0.00167467	0.975749
Tiller_Number_Non_Productive_Raw	Lodging	0.24	1.5752e-05	0.23854	1.82242e-05
Tiller_Number_Non_Productive_Raw	Spike_Density	0.06	0.320144	0.076688	0.17116
Tiller_Number_Non_Productive_Raw	Spike_Row_Type	0.13	0.0209456	0.102381	0.0665295
Tiller_Number_Non_Productive_Raw	Tiller_Number_Productive_Raw	0.06	0.274342	0.0577781	0.301313
Tiller_Number_Non_Productive_Raw	Tiller_Number_Week_2	0.25	5.03474e-06	0.291464	1.00474e-07
Tiller_Number_Non_Productive_Raw	Tiller_Number_Week_3_Raw	0.24	9.74858e-06	0.297005	5.57554e-08
Tiller_Number_Non_Productive_Raw	Tiller_Number_Week_4	0.58	0	0.594929	0
Tiller_Number_Non_Productive_Raw	Tiller_Number_Week_5_Raw	0.77	0	0.749024	0
Tiller_Number_Non_Productive_Raw	Tiller_Number_Week_6_Raw	0.81	0	0.743417	0
Tiller_Number_Non_Productive_Raw	Tiller_Number_Week_7_Raw	0.65	0	0.581676	0
Tiller_Number_Non_Productive_Raw	Tillering_Rate	0.83	0	0.774015	0
Tiller_Number_Non_Productive_Raw	Weeks_Increasing_Raw	-0.16	0.00346223	-0.184105	0.000902726
Tiller_Number_Productive_Raw	Lodging	0.01	0.891643	-0.00234591	0.966868
Tiller_Number_Productive_Raw	Spike_Density	-0.41	3.39728e-14	-0.39124	3.78808e-13
Tiller_Number_Productive_Raw	Spike_Row_Type	-0.42	6.66134e-15	-0.418834	3.9968e-15
Tiller_Number_Productive_Raw	Tiller_Number_Week_2	0.35	1.67475e-10	0.329995	1.28404e-09
Tiller_Number_Productive_Raw	Tiller_Number_Week_3_Raw	0.48	0	0.489583	0
Tiller_Number_Productive_Raw	Tiller_Number_Week_4	0.45	0	0.444607	0
Tiller_Number_Productive_Raw	Tiller_Number_Week_5_Raw	0.54	0	0.568792	0
Tiller_Number_Productive_Raw	Tiller_Number_Week_6_Raw	0.57	0	0.605355	0
Tiller_Number_Productive_Raw	Tiller_Number_Week_7_Raw	0.7	0	0.712625	0
Tiller_Number_Productive_Raw	Tillering_Rate	0.46	0	0.476635	0
Tiller_Number_Productive_Raw	Weeks_Increasing_Raw	0.2	0.000350309	0.201014	0.000283241
Tiller_Number_Week_2	Lodging	0.15	0.00704931	0.112183	0.0459592
Tiller_Number_Week_2	Spike_Density	-0.3	1.90537e-08	-0.259288	1.80395e-06
Tiller_Number_Week_2	Spike_Row_Type	-0.24	8.33583e-06	-0.225793	3.29055e-05
Tiller_Number_Week_2	Tiller_Number_Week_3_Raw	0.79	0	0.786827	0
Tiller_Number_Week_2	Tiller_Number_Week_4	0.64	0	0.673493	0
Tiller_Number_Week_2	Tiller_Number_Week_5_Raw	0.42	1.77636e-15	0.464137	0
Tiller_Number_Week_2	Tiller_Number_Week_6_Raw	0.34	3.44734e-10	0.392333	1.15907e-13
Tiller_Number_Week_2	Tiller_Number_Week_7_Raw	0.32	2.44446e-09	0.337718	2.66928e-10
Tiller_Number_Week_2	Tillering_Rate	0.38	1.41176e-12	0.41751	1.9984e-15
Tiller_Number_Week_2	Weeks_Increasing_Raw	-0.14	0.0104789	-0.143	0.0090759
Tiller_Number_Week_3_Raw	Lodging	0.03	0.598023	0.0203858	0.717679
Tiller_Number_Week_3_Raw	Spike_Density	-0.42	1.9984e-15	-0.384521	4.52527e-13
Tiller_Number_Week_3_Raw	Spike_Row_Type	-0.45	0	-0.429611	2.22045e-16
Tiller_Number_Week_3_Raw	Tiller_Number_Week_4	0.71	0	0.743298	0
Tiller_Number_Week_3_Raw	Tiller_Number_Week_5_Raw	0.52	0	0.563717	0
Tiller_Number_Week_3_Raw	Tiller_Number_Week_6_Raw	0.44	0	0.506292	0
Tiller_Number_Week_3_Raw	Tiller_Number_Week_7_Raw	0.45	0	0.471822	0
Tiller_Number_Week_3_Raw	Tillering_Rate	0.46	0	0.510144	0
Tiller_Number_Week_3_Raw	Weeks_Increasing_Raw	-0.11	0.049893	-0.121655	0.0266547
Tiller_Number_Week_4	Lodging	0.22	7.16092e-05	0.196777	0.000424783
Tiller_Number_Week_4	Spike_Density	-0.15	0.00524622	-0.127958	0.0200605
Tiller_Number_Week_4	Spike_Row_Type	-0.09	0.109095	-0.10996	0.045276
Tiller_Number_Week_4	Tiller_Number_Week_5_Raw	0.83	0	0.82374	0
Tiller_Number_Week_4	Tiller_Number_Week_6_Raw	0.73	0	0.734532	0
Tiller_Number_Week_4	Tiller_Number_Week_7_Raw	0.6	0	0.588465	0
Tiller_Number_Week_4	Tillering_Rate	0.79	0	0.782238	0
Tiller_Number_Week_4	Weeks_Increasing_Raw	-0.28	1.77102e-07	-0.272037	4.82106e-07
Tiller_Number_Week_5_Raw	Lodging	0.21	0.000148687	0.185243	0.000920176
Tiller_Number_Week_5_Raw	Spike_Density	-0.15	0.00823838	-0.166318	0.00243748
Tiller_Number_Week_5_Raw	Spike_Row_Type	-0.09	0.107154	-0.150117	0.00613473
Tiller_Number_Week_5_Raw	Tiller_Number_Week_6_Raw	0.92	0	0.936167	0
Tiller_Number_Week_5_Raw	Tiller_Number_Week_7_Raw	0.8	0	0.809158	0
Tiller_Number_Week_5_Raw	Tillering_Rate	0.95	0	0.946273	0
Tiller_Number_Week_5_Raw	Weeks_Increasing_Raw	-0.21	9.81815e-05	-0.206953	0.000145961
Tiller_Number_Week_6_Raw	Lodging	0.22	9.13787e-05	0.186346	0.000856235
Tiller_Number_Week_6_Raw	Spike_Density	-0.15	0.0053075	-0.174319	0.00147778
Tiller_Number_Week_6_Raw	Spike_Row_Type	-0.09	0.111238	-0.148843	0.00658818
Tiller_Number_Week_6_Raw	Tiller_Number_Week_7_Raw	0.87	0	0.880073	0
Tiller_Number_Week_6_Raw	Tillering_Rate	0.9	0	0.892845	0
Tiller_Number_Week_6_Raw	Weeks_Increasing_Raw	-0.03	0.633712	-0.018968	0.73059
Tiller_Number_Week_7_Raw	Lodging	0.09	0.117796	0.0566099	0.315024
Tiller_Number_Week_7_Raw	Spike_Density	-0.29	5.56957e-08	-0.308818	1.00838e-08
Tiller_Number_Week_7_Raw	Spike_Row_Type	-0.24	1.11303e-05	-0.282464	1.65615e-07
Tiller_Number_Week_7_Raw	Tillering_Rate	0.76	0	0.729657	0
Tiller_Number_Week_7_Raw	Weeks_Increasing_Raw	0.21	8.52704e-05	0.236739	1.30389e-05
Weeks_Increasing_Raw	Lodging	-0.16	0.00336065	-0.139529	0.0128969
Weeks_Increasing_Raw	Spike_Density	-0.18	0.000985958	-0.203681	0.000195213
Weeks_Increasing_Raw	Spike_Row_Type	-0.21	7.86414e-05	-0.210404	0.000112182
Weeks_Increasing_Raw	Tillering_Rate	-0.36	1.75522e-11	-0.389909	1.68754e-13

## Sheet: 2015_ppd-H1_r
Trait 1	Trait 2	Pearson Correlation	Pearson p-value	Spearman Correlation	Spearman p-value
Days_to_Heading_Raw	Fifty_Kernel_Weight_Raw	-0.16	0.000929915	-0.11	0.0165967
Days_to_Heading_Raw	Leaf_Width_Raw	0.03	0.555697	-0.02	0.672983
Days_to_Heading_Raw	Lodging	-0.01	0.787926	-0.03	0.61187
Days_to_Heading_Raw	Percent_Productive_Tillers	-0.33	3.68594e-12	-0.33	1.44418e-12
Days_to_Heading_Raw	Plant_Height_Raw	0.22	6.08818e-06	0.2	2.10305e-05
Days_to_Heading_Raw	Seeds_Per_Spike_Raw	-0.07	0.131622	-0.05	0.320335
Days_to_Heading_Raw	Spike_Density	-0.11	0.0182985	-0.15	0.00215464
Days_to_Heading_Raw	Spike_Length_Raw	0.18	0.000104994	0.25	7.59884e-08
Days_to_Heading_Raw	Spike_Row_Type	-0.06	0.241083	-0.15	0.00187812
Days_to_Heading_Raw	Stem_Diameter_Raw	0.06	0.190381	-0.02	0.716855
Days_to_Heading_Raw	Tiller_Number_Maximum_Raw	0.37	6.66134e-16	0.4	0
Days_to_Heading_Raw	Tiller_Number_Non_Productive_Raw	0.43	0	0.46	0
Days_to_Heading_Raw	Tiller_Number_Productive_Raw	0.08	0.110372	0.13	0.0062061
Days_to_Heading_Raw	Tiller_Number_Week_2	-0.03	0.567401	0.02	0.701587
Days_to_Heading_Raw	Tiller_Number_Week_3_Raw	0.12	0.0144479	0.18	0.000161925
Days_to_Heading_Raw	Tiller_Number_Week_4	0.26	2.47315e-08	0.34	4.60076e-13
Days_to_Heading_Raw	Tiller_Number_Week_5_Raw	0.42	0	0.46	0
Days_to_Heading_Raw	Tiller_Number_Week_6_Raw	0.41	0	0.44	0
Days_to_Heading_Raw	Tiller_Number_Week_7_Raw	0.33	1.99329e-12	0.35	3.75255e-14
Days_to_Heading_Raw	Tillering_Rate	0.41	0	0.45	0
Days_to_Heading_Raw	Weeks_Increasing_Raw	-0.11	0.0229347	-0.13	0.00863958
Fifty_Kernel_Weight_Raw	Leaf_Width_Raw	-0.3	1.56906e-10	-0.3	3.26899e-10
Fifty_Kernel_Weight_Raw	Lodging	-0.09	0.073666	-0.11	0.0234491
Fifty_Kernel_Weight_Raw	Percent_Productive_Tillers	0.26	4.34453e-08	0.28	3.02818e-09
Fifty_Kernel_Weight_Raw	Plant_Height_Raw	0.03	0.535786	0.02	0.700856
Fifty_Kernel_Weight_Raw	Seeds_Per_Spike_Raw	-0.58	0	-0.58	0
Fifty_Kernel_Weight_Raw	Spike_Density	-0.58	0	-0.59	0
Fifty_Kernel_Weight_Raw	Spike_Length_Raw	0.38	2.22045e-16	0.39	0
Fifty_Kernel_Weight_Raw	Spike_Row_Type	-0.6	0	-0.62	0
Fifty_Kernel_Weight_Raw	Stem_Diameter_Raw	-0.22	4.89515e-06	-0.23	1.43609e-06
Fifty_Kernel_Weight_Raw	Tiller_Number_Maximum_Raw	0.14	0.00295061	0.17	0.000515115
Fifty_Kernel_Weight_Raw	Tiller_Number_Non_Productive_Raw	-0.09	0.0552375	-0.11	0.0169659
Fifty_Kernel_Weight_Raw	Tiller_Number_Productive_Raw	0.32	6.2661e-12	0.36	3.77476e-15
Fifty_Kernel_Weight_Raw	Tiller_Number_Week_2	0.11	0.018717	0.13	0.00610701
Fifty_Kernel_Weight_Raw	Tiller_Number_Week_3_Raw	0.19	9.57087e-05	0.23	9.8929e-07
Fifty_Kernel_Weight_Raw	Tiller_Number_Week_4	0.06	0.183636	0.08	0.0877435
Fifty_Kernel_Weight_Raw	Tiller_Number_Week_5_Raw	0.1	0.0396527	0.12	0.0127211
Fifty_Kernel_Weight_Raw	Tiller_Number_Week_6_Raw	0.12	0.00916523	0.15	0.00179701
Fifty_Kernel_Weight_Raw	Tiller_Number_Week_7_Raw	0.22	5.69065e-06	0.26	2.87108e-08
Fifty_Kernel_Weight_Raw	Tillering_Rate	0.05	0.329887	0.06	0.230953
Fifty_Kernel_Weight_Raw	Weeks_Increasing_Raw	0.29	1.2551e-09	0.29	6.6068e-10
Leaf_Width_Raw	Lodging	0.07	0.147475	0.08	0.127233
Leaf_Width_Raw	Percent_Productive_Tillers	-0.07	0.155963	-0.05	0.261645
Leaf_Width_Raw	Plant_Height_Raw	0.2	2.47404e-05	0.22	4.19646e-06
Leaf_Width_Raw	Seeds_Per_Spike_Raw	0.63	0	0.58	0
Leaf_Width_Raw	Spike_Density	0.61	0	0.56	0
Leaf_Width_Raw	Spike_Length_Raw	-0.34	4.18776e-13	-0.35	1.44773e-13
Leaf_Width_Raw	Spike_Row_Type	0.61	0	0.61	0
Leaf_Width_Raw	Stem_Diameter_Raw	0.59	0	0.56	0
Leaf_Width_Raw	Tiller_Number_Maximum_Raw	-0.45	0	-0.46	0
Leaf_Width_Raw	Tiller_Number_Non_Productive_Raw	-0.19	6.76076e-05	-0.19	7.2058e-05
Leaf_Width_Raw	Tiller_Number_Productive_Raw	-0.45	0	-0.45	0
Leaf_Width_Raw	Tiller_Number_Week_2	-0.26	4.44901e-08	-0.26	3.67213e-08
Leaf_Width_Raw	Tiller_Number_Week_3_Raw	-0.39	0	-0.41	0
Leaf_Width_Raw	Tiller_Number_Week_4	-0.35	1.33227e-13	-0.34	6.75016e-13
Leaf_Width_Raw	Tiller_Number_Week_5_Raw	-0.41	0	-0.42	0
Leaf_Width_Raw	Tiller_Number_Week_6_Raw	-0.43	0	-0.44	0
Leaf_Width_Raw	Tiller_Number_Week_7_Raw	-0.47	0	-0.5	0
Leaf_Width_Raw	Tillering_Rate	-0.36	9.76996e-15	-0.37	1.55431e-15
Leaf_Width_Raw	Weeks_Increasing_Raw	-0.23	2.6191e-06	-0.2	2.7036e-05
Lodging	Spike_Density	0.1	0.0543897	0.09	0.0686987
Lodging	Spike_Row_Type	0.2	8.25511e-05	0.2	6.00761e-05
Lodging	Tillering_Rate	-0.05	0.298967	-0.04	0.416149
Percent_Productive_Tillers	Lodging	-0.01	0.779595	-0.04	0.453769
Percent_Productive_Tillers	Plant_Height_Raw	0.08	0.0885611	0.03	0.517133
Percent_Productive_Tillers	Seeds_Per_Spike_Raw	-0.14	0.00437864	-0.15	0.00240191
Percent_Productive_Tillers	Spike_Density	-0.13	0.00657646	-0.11	0.0184647
Percent_Productive_Tillers	Spike_Length_Raw	0.03	0.474209	0.02	0.694862
Percent_Productive_Tillers	Spike_Row_Type	-0.12	0.0101659	-0.12	0.00931016
Percent_Productive_Tillers	Stem_Diameter_Raw	-0.16	0.000878926	-0.14	0.00474715
Percent_Productive_Tillers	Tiller_Number_Maximum_Raw	-0.26	3.17504e-08	-0.25	2.13502e-07
Percent_Productive_Tillers	Tiller_Number_Non_Productive_Raw	-0.81	0	-0.84	0
Percent_Productive_Tillers	Tiller_Number_Productive_Raw	0.47	0	0.44	0
Percent_Productive_Tillers	Tiller_Number_Week_2	-0.06	0.190604	-0.08	0.0856499
Percent_Productive_Tillers	Tiller_Number_Week_3_Raw	-0.05	0.2878	-0.04	0.407482
Percent_Productive_Tillers	Tiller_Number_Week_4	-0.17	0.000349775	-0.18	0.000125164
Percent_Productive_Tillers	Tiller_Number_Week_5_Raw	-0.23	8.67576e-07	-0.23	1.34331e-06
Percent_Productive_Tillers	Tiller_Number_Week_6_Raw	-0.25	1.38556e-07	-0.23	1.74807e-06
Percent_Productive_Tillers	Tiller_Number_Week_7_Raw	-0.19	4.91261e-05	-0.16	0.000778905
Percent_Productive_Tillers	Tillering_Rate	-0.28	2.66179e-09	-0.27	1.01934e-08
Percent_Productive_Tillers	Weeks_Increasing_Raw	0.1	0.036453	0.09	0.0533738
Plant_Height_Raw	Lodging	0.44	0	0.44	0
Plant_Height_Raw	Seeds_Per_Spike_Raw	0.08	0.0850344	0.14	0.00397728
Plant_Height_Raw	Spike_Density	-0.05	0.318415	-0.03	0.557902
Plant_Height_Raw	Spike_Length_Raw	0.28	2.26383e-09	0.26	3.37463e-08
Plant_Height_Raw	Spike_Row_Type	0	0.956077	0.02	0.702034
Plant_Height_Raw	Stem_Diameter_Raw	0.27	1.2544e-08	0.3	2.10524e-10
Plant_Height_Raw	Tiller_Number_Maximum_Raw	-0.04	0.400612	-0.04	0.406783
Plant_Height_Raw	Tiller_Number_Non_Productive_Raw	-0.08	0.0819286	-0.04	0.461956
Plant_Height_Raw	Tiller_Number_Productive_Raw	0.02	0.622981	0.01	0.864584
Plant_Height_Raw	Tiller_Number_Week_2	-0.01	0.80707	0	0.971246
Plant_Height_Raw	Tiller_Number_Week_3_Raw	-0.01	0.797226	-0.01	0.900322
Plant_Height_Raw	Tiller_Number_Week_4	0.03	0.581782	0.03	0.491281
Plant_Height_Raw	Tiller_Number_Week_5_Raw	0.02	0.715632	0.01	0.778715
Plant_Height_Raw	Tiller_Number_Week_6_Raw	-0.02	0.612476	-0.02	0.718085
Plant_Height_Raw	Tiller_Number_Week_7_Raw	-0.05	0.258011	-0.06	0.226966
Plant_Height_Raw	Tillering_Rate	-0.01	0.887179	0.01	0.875577
Plant_Height_Raw	Weeks_Increasing_Raw	-0.09	0.0650242	-0.1	0.0376549
Seeds_Per_Spike_Raw	Lodging	0.17	0.000664583	0.16	0.00120036
Seeds_Per_Spike_Raw	Spike_Density	0.93	0	0.85	0
Seeds_Per_Spike_Raw	Spike_Length_Raw	-0.43	0	-0.31	2.19318e-11
Seeds_Per_Spike_Raw	Spike_Row_Type	0.86	0	0.78	0
Seeds_Per_Spike_Raw	Stem_Diameter_Raw	0.66	0	0.62	0
Seeds_Per_Spike_Raw	Tiller_Number_Maximum_Raw	-0.43	0	-0.37	3.33067e-15
Seeds_Per_Spike_Raw	Tiller_Number_Non_Productive_Raw	-0.14	0.00450781	-0.08	0.085014
Seeds_Per_Spike_Raw	Tiller_Number_Productive_Raw	-0.48	0	-0.43	0
Seeds_Per_Spike_Raw	Tiller_Number_Week_2	-0.27	5.39703e-09	-0.22	2.59302e-06
Seeds_Per_Spike_Raw	Tiller_Number_Week_3_Raw	-0.45	0	-0.37	8.88178e-16
Seeds_Per_Spike_Raw	Tiller_Number_Week_4	-0.33	1.34537e-12	-0.23	1.1196e-06
Seeds_Per_Spike_Raw	Tiller_Number_Week_5_Raw	-0.4	0	-0.31	2.61577e-11
Seeds_Per_Spike_Raw	Tiller_Number_Week_6_Raw	-0.42	0	-0.34	1.61204e-13
Seeds_Per_Spike_Raw	Tiller_Number_Week_7_Raw	-0.47	0	-0.43	0
Seeds_Per_Spike_Raw	Tillering_Rate	-0.35	1.15907e-13	-0.26	3.13383e-08
Seeds_Per_Spike_Raw	Weeks_Increasing_Raw	-0.24	4.45448e-07	-0.27	9.67662e-09
Spike_Density	Tillering_Rate	-0.38	2.22045e-16	-0.33	8.84626e-13
Spike_Length_Raw	Lodging	0.02	0.715311	-0.01	0.890207
Spike_Length_Raw	Spike_Density	-0.68	0	-0.7	0
Spike_Length_Raw	Spike_Row_Type	-0.61	0	-0.61	0
Spike_Length_Raw	Stem_Diameter_Raw	-0.22	5.47227e-06	-0.21	1.32694e-05
Spike_Length_Raw	Tiller_Number_Maximum_Raw	0.35	2.39808e-14	0.38	2.22045e-16
Spike_Length_Raw	Tiller_Number_Non_Productive_Raw	0.15	0.00143782	0.18	0.000162682
Spike_Length_Raw	Tiller_Number_Productive_Raw	0.35	2.62013e-14	0.38	4.44089e-16
Spike_Length_Raw	Tiller_Number_Week_2	0.28	2.10115e-09	0.29	1.14692e-09
Spike_Length_Raw	Tiller_Number_Week_3_Raw	0.42	0	0.44	0
Spike_Length_Raw	Tiller_Number_Week_4	0.3	7.78617e-11	0.33	2.44249e-12
Spike_Length_Raw	Tiller_Number_Week_5_Raw	0.37	6.66134e-16	0.4	0
Spike_Length_Raw	Tiller_Number_Week_6_Raw	0.36	2.08722e-14	0.38	0
Spike_Length_Raw	Tiller_Number_Week_7_Raw	0.36	4.88498e-15	0.4	0
Spike_Length_Raw	Tillering_Rate	0.34	4.29656e-13	0.36	5.10703e-15
Spike_Length_Raw	Weeks_Increasing_Raw	0.06	0.197511	0.05	0.28233
Spike_Row_Type	Spike_Density	0.87	0	0.8	0
Spike_Row_Type	Tillering_Rate	-0.4	0	-0.42	0
Stem_Diameter_Raw	Lodging	0.19	0.000124677	0.21	2.28356e-05
Stem_Diameter_Raw	Spike_Density	0.61	0	0.5	0
Stem_Diameter_Raw	Spike_Row_Type	0.58	0	0.58	0
Stem_Diameter_Raw	Tiller_Number_Maximum_Raw	-0.34	1.77192e-13	-0.36	1.37668e-14
Stem_Diameter_Raw	Tiller_Number_Non_Productive_Raw	-0.08	0.0923482	-0.09	0.0494959
Stem_Diameter_Raw	Tiller_Number_Productive_Raw	-0.43	0	-0.43	0
Stem_Diameter_Raw	Tiller_Number_Week_2	-0.25	7.83886e-08	-0.23	1.35072e-06
Stem_Diameter_Raw	Tiller_Number_Week_3_Raw	-0.38	4.44089e-16	-0.37	8.88178e-16
Stem_Diameter_Raw	Tiller_Number_Week_4	-0.33	2.09366e-12	-0.3	2.19616e-10
Stem_Diameter_Raw	Tiller_Number_Week_5_Raw	-0.33	1.79101e-12	-0.32	9.03233e-12
Stem_Diameter_Raw	Tiller_Number_Week_6_Raw	-0.34	3.55715e-13	-0.34	2.367e-13
Stem_Diameter_Raw	Tiller_Number_Week_7_Raw	-0.37	3.10862e-15	-0.4	0
Stem_Diameter_Raw	Tillering_Rate	-0.31	5.71125e-11	-0.31	4.00702e-11
Stem_Diameter_Raw	Weeks_Increasing_Raw	-0.13	0.00663882	-0.11	0.0174411
Tiller_Number_Maximum_Raw	Lodging	-0.08	0.0929954	-0.08	0.130951
Tiller_Number_Maximum_Raw	Spike_Density	-0.45	0	-0.42	0
Tiller_Number_Maximum_Raw	Spike_Row_Type	-0.46	0	-0.48	0
Tiller_Number_Maximum_Raw	Tiller_Number_Non_Productive_Raw	0.72	0	0.69	0
Tiller_Number_Maximum_Raw	Tiller_Number_Productive_Raw	0.69	0	0.71	0
Tiller_Number_Maximum_Raw	Tiller_Number_Week_2	0.51	0	0.5	0
Tiller_Number_Maximum_Raw	Tiller_Number_Week_3_Raw	0.65	0	0.65	0
Tiller_Number_Maximum_Raw	Tiller_Number_Week_4	0.77	0	0.78	0
Tiller_Number_Maximum_Raw	Tiller_Number_Week_5_Raw	0.95	0	0.95	0
Tiller_Number_Maximum_Raw	Tiller_Number_Week_6_Raw	0.98	0	0.98	0
Tiller_Number_Maximum_Raw	Tiller_Number_Week_7_Raw	0.96	0	0.95	0
Tiller_Number_Maximum_Raw	Tillering_Rate	0.91	0	0.92	0
Tiller_Number_Maximum_Raw	Weeks_Increasing_Raw	0.19	7.70815e-05	0.17	0.000499899
Tiller_Number_Non_Productive_Raw	Lodging	-0.04	0.408103	-0.01	0.768072
Tiller_Number_Non_Productive_Raw	Spike_Density	-0.15	0.00204296	-0.13	0.00640632
Tiller_Number_Non_Productive_Raw	Spike_Row_Type	-0.16	0.00111297	-0.16	0.000797523
Tiller_Number_Non_Productive_Raw	Tiller_Number_Productive_Raw	0	0.92402	0.05	0.341689
Tiller_Number_Non_Productive_Raw	Tiller_Number_Week_2	0.31	3.28251e-11	0.32	5.2538e-12
Tiller_Number_Non_Productive_Raw	Tiller_Number_Week_3_Raw	0.38	2.22045e-16	0.37	2.22045e-15
Tiller_Number_Non_Productive_Raw	Tiller_Number_Week_4	0.51	0	0.54	0
Tiller_Number_Non_Productive_Raw	Tiller_Number_Week_5_Raw	0.67	0	0.66	0
Tiller_Number_Non_Productive_Raw	Tiller_Number_Week_6_Raw	0.71	0	0.67	0
Tiller_Number_Non_Productive_Raw	Tiller_Number_Week_7_Raw	0.66	0	0.6	0
Tiller_Number_Non_Productive_Raw	Tillering_Rate	0.68	0	0.67	0
Tiller_Number_Non_Productive_Raw	Weeks_Increasing_Raw	0.05	0.255694	0.03	0.566237
Tiller_Number_Productive_Raw	Lodging	-0.08	0.125431	-0.09	0.0671179
Tiller_Number_Productive_Raw	Spike_Density	-0.5	0	-0.46	0
Tiller_Number_Productive_Raw	Spike_Row_Type	-0.52	0	-0.55	0
Tiller_Number_Productive_Raw	Tiller_Number_Week_2	0.42	0	0.42	0
Tiller_Number_Productive_Raw	Tiller_Number_Week_3_Raw	0.56	0	0.58	0
Tiller_Number_Productive_Raw	Tiller_Number_Week_4	0.58	0	0.58	0
Tiller_Number_Productive_Raw	Tiller_Number_Week_5_Raw	0.68	0	0.69	0
Tiller_Number_Productive_Raw	Tiller_Number_Week_6_Raw	0.68	0	0.7	0
Tiller_Number_Productive_Raw	Tiller_Number_Week_7_Raw	0.7	0	0.72	0
Tiller_Number_Productive_Raw	Tillering_Rate	0.61	0	0.63	0
Tiller_Number_Productive_Raw	Weeks_Increasing_Raw	0.21	1.00967e-05	0.19	6.11406e-05
Tiller_Number_Week_2	Lodging	-0.05	0.335476	-0.05	0.312132
Tiller_Number_Week_2	Spike_Density	-0.31	4.81815e-11	-0.28	2.50042e-09
Tiller_Number_Week_2	Spike_Row_Type	-0.37	4.44089e-16	-0.39	0
Tiller_Number_Week_2	Tiller_Number_Week_3_Raw	0.82	0	0.8	0
Tiller_Number_Week_2	Tiller_Number_Week_4	0.73	0	0.71	0
Tiller_Number_Week_2	Tiller_Number_Week_5_Raw	0.54	0	0.53	0
Tiller_Number_Week_2	Tiller_Number_Week_6_Raw	0.51	0	0.5	0
Tiller_Number_Week_2	Tiller_Number_Week_7_Raw	0.47	0	0.45	0
Tiller_Number_Week_2	Tillering_Rate	0.52	0	0.53	0
Tiller_Number_Week_2	Weeks_Increasing_Raw	-0.03	0.526458	-0.05	0.269597
Tiller_Number_Week_3_Raw	Lodging	-0.15	0.00244888	-0.15	0.00301284
Tiller_Number_Week_3_Raw	Spike_Density	-0.49	0	-0.43	0
Tiller_Number_Week_3_Raw	Spike_Row_Type	-0.59	0	-0.62	0
Tiller_Number_Week_3_Raw	Tiller_Number_Week_4	0.85	0	0.84	0
Tiller_Number_Week_3_Raw	Tiller_Number_Week_5_Raw	0.69	0	0.69	0
Tiller_Number_Week_3_Raw	Tiller_Number_Week_6_Raw	0.65	0	0.65	0
Tiller_Number_Week_3_Raw	Tiller_Number_Week_7_Raw	0.61	0	0.61	0
Tiller_Number_Week_3_Raw	Tillering_Rate	0.66	0	0.66	0
Tiller_Number_Week_3_Raw	Weeks_Increasing_Raw	-0.02	0.720606	-0.02	0.660004
Tiller_Number_Week_4	Lodging	-0.09	0.0847484	-0.09	0.0618791
Tiller_Number_Week_4	Spike_Density	-0.36	1.70974e-14	-0.29	1.19435e-09
Tiller_Number_Week_4	Spike_Row_Type	-0.44	0	-0.45	0
Tiller_Number_Week_4	Tiller_Number_Week_5_Raw	0.83	0	0.84	0
Tiller_Number_Week_4	Tiller_Number_Week_6_Raw	0.77	0	0.79	0
Tiller_Number_Week_4	Tiller_Number_Week_7_Raw	0.7	0	0.7	0
Tiller_Number_Week_4	Tillering_Rate	0.79	0	0.81	0
Tiller_Number_Week_4	Weeks_Increasing_Raw	-0.06	0.233164	-0.07	0.120963
Tiller_Number_Week_5_Raw	Lodging	-0.08	0.112804	-0.06	0.235724
Tiller_Number_Week_5_Raw	Spike_Density	-0.43	0	-0.38	0
Tiller_Number_Week_5_Raw	Spike_Row_Type	-0.46	0	-0.48	0
Tiller_Number_Week_5_Raw	Tiller_Number_Week_6_Raw	0.95	0	0.95	0
Tiller_Number_Week_5_Raw	Tiller_Number_Week_7_Raw	0.89	0	0.88	0
Tiller_Number_Week_5_Raw	Tillering_Rate	0.94	0	0.94	0
Tiller_Number_Week_5_Raw	Weeks_Increasing_Raw	0.02	0.753842	-0.01	0.882113
Tiller_Number_Week_6_Raw	Lodging	-0.07	0.14255	-0.06	0.197187
Tiller_Number_Week_6_Raw	Spike_Density	-0.44	0	-0.4	0
Tiller_Number_Week_6_Raw	Spike_Row_Type	-0.45	0	-0.48	0
Tiller_Number_Week_6_Raw	Tiller_Number_Week_7_Raw	0.93	0	0.92	0
Tiller_Number_Week_6_Raw	Tillering_Rate	0.91	0	0.91	0
Tiller_Number_Week_6_Raw	Weeks_Increasing_Raw	0.14	0.00287579	0.13	0.00795323
Tiller_Number_Week_7_Raw	Lodging	-0.11	0.0335172	-0.11	0.0334606
Tiller_Number_Week_7_Raw	Spike_Density	-0.49	0	-0.47	0
Tiller_Number_Week_7_Raw	Spike_Row_Type	-0.49	0	-0.52	0
Tiller_Number_Week_7_Raw	Tillering_Rate	0.83	0	0.82	0
Tiller_Number_Week_7_Raw	Weeks_Increasing_Raw	0.31	2.24465e-11	0.29	3.66229e-10
Weeks_Increasing_Raw	Lodging	-0.11	0.0257051	-0.11	0.0242291
Weeks_Increasing_Raw	Spike_Density	-0.22	5.64928e-06	-0.22	4.53349e-06
Weeks_Increasing_Raw	Spike_Row_Type	-0.18	0.000126972	-0.17	0.000275134
Weeks_Increasing_Raw	Tillering_Rate	-0.21	1.24045e-05	-0.21	1.4181e-05

[truncated: 5 more sheets: 2016_All, 2016_2-Row, 2016_6-Row, 2016_Ppd-H1_D, 2016_ppd-H1_r]
